# Microbial population dynamics decouple growth response from environmental nutrient concentration

Justus Wilhelm Fink\*

*Institute of Integrative Biology, Department of Environmental Systems Science, ETH Zurich, Zurich, Switzerland*

Noelle A. Held

*Institute of Biogeochemistry and Pollutant Dynamics,  
Department of Environmental Systems Science, ETH Zurich, Zurich, Switzerland and  
Department of Environmental Microbiology, Swiss Federal Institute  
of Aquatic Science and Technology (Eawag), Dübendorf, Switzerland*

Michael Manhart†

*Institute of Integrative Biology, Department of Environmental Systems Science, ETH Zurich, Zurich, Switzerland  
Department of Environmental Microbiology, Swiss Federal Institute of  
Aquatic Science and Technology (Eawag), Dübendorf, Switzerland and  
Center for Advanced Biotechnology and Medicine and Department of Biochemistry and Molecular Biology,  
Robert Wood Johnson Medical School, Rutgers University, Piscataway, NJ, USA*

(Dated: November 18, 2022)

How the growth rate of a microbial population responds to the environmental availability of chemical nutrients and other resources is a fundamental question in microbiology. Models of this response, such as the widely-used Monod model, are generally characterized by a maximum growth rate and a half-saturation concentration of the resource. What values should we expect for these half-saturation concentrations, and how should they depend on the environmental concentration of the resource? We survey growth response data across a wide range of organisms and resources. We find that the half-saturation concentrations vary across orders of magnitude, even for the same organism and resource. To explain this variation, we develop an evolutionary model to show that demographic fluctuations (genetic drift) can constrain the adaptation of half-saturation concentrations. We find that this effect fundamentally differs depending on the type of population dynamics: populations undergoing periodic bottlenecks of fixed size will adapt their half-saturation concentration in proportion to the environmental resource concentration, but populations undergoing periodic dilutions of fixed size will evolve half-saturation concentrations that are largely decoupled from the environmental concentration. Our model not only provides testable predictions for laboratory evolution experiments, but it also reveals how an evolved half-saturation concentration may not reflect the organism's environment. In particular, this explains how organisms in resource-rich environments can still evolve fast growth at low resource concentrations. Altogether our results demonstrate the critical role of population dynamics in shaping fundamental ecological traits.

Keywords: Microbial evolution | Monod model | resource competition | half-saturation concentration | selection-drift balance

## INTRODUCTION

Microbial populations rely on a wide range of resources, including chemical nutrients such as sugars, minerals, and metals, as well as space, light, and prey [1]. These resources vary in abundance across time and environments, which typically elicits differences in growth rates [2-4]. A significant literature discusses how natural populations can be classified as oligotrophs or copiotrophs [4-6], that differ, among other things, in their growth rate response to resource concentration. The most widely-used quantitative model of the relationship between growth rate and resource concentration is at-

tributed to Jacques Monod [7]. In the Monod model, growth rate increases linearly with resource concentration at low concentrations, and then saturates at high concentrations, reaching half its maximum value at some intermediate concentration of resources. This half-saturation concentration of the growth response, also known as the Monod constant, therefore plays a key role in determining the ability of the population to grow on scarce resources. This suggests that lower resource concentrations in the environment may drive populations to evolve commensurately lower half-saturation concentrations [8, 9], one of the main predictions of resource-ratio theory [10-12]. Quantitative models and data for the dependence of growth rate on resource concentration are important both for predicting the behavior of a population under different environmental conditions [13-15], as well as for inferring the natural environmental niche from evolved traits of the population. This inverse approach has been used, for example, to infer separate niches for

\* To whom correspondence should be addressed. Email: [jus-tus.fink@env.ethz.ch](mailto:jus-tus.fink@env.ethz.ch)

† To whom correspondence should be addressed. Email: [mmanhart@rutgers.edu](mailto:mmanhart@rutgers.edu)

ammonia-oxidizing archaea and bacteria in the global nitrogen cycle based on kinetic parameters for resource consumption [16–19].

Even though these concepts have been central elements of microbiology and ecology for decades, there is limited experimental evidence that directly demonstrates the evolution of growth rate response to resources. Continuous culture for 200–300 generations led to improved growth rate at low glucose concentrations for *Escherichia coli* [20, 21] and *Saccharomyces cerevisiae* [22], but these changes were not clearly attributable to genetic (rather than physiological) adaptation. The Long-Term Evolution Experiment (LTEE) of *E. coli* found that the half-saturation concentration for glucose actually increased over the first 2000 generations, although the maximum growth rate at much higher glucose concentrations significantly increased as well [23]. More recently, Bernhardt et al. [12] observed adaptation in the half-saturation concentration for phosphorus of *Chlamydomonas reinhardtii* when limited for phosphorus, but they did not obtain consistent outcomes for nitrogen and light. Perhaps the most explicit evidence so far is from Hart et al. [24], who found that a synthetic auxotroph strain of *S. cerevisiae* significantly reduced its half-saturation concentration for lysine through genetic adaptations.

While laboratory experiments can test the basic principle, mathematical models are better suited to exploring the wide range of environments necessary to establish the link between environment and evolved traits. Previous modeling studies on this topic have focused on how tradeoffs in growth rate at low versus high resource concentrations define an optimum strategy for a single strain [13] or can facilitate coexistence of multiple strains or species when resource concentrations fluctuate [25, 26]. More recent work has shown how this coexistence can spontaneously evolve if such tradeoffs constrain the effects of mutations [27, 28]. However, the evidence for these tradeoffs, especially on spontaneous mutations, is limited [27–31]. Thus their importance for explaining the evolved variation in growth rate response, especially the half-saturation concentration, is unclear.

Here we address this problem using both empirical and modeling approaches. We first perform a survey of data for the growth rate response to resource concentration across a wide range of organisms and resources. We find that the measured half-saturation concentrations vary over orders of magnitude, even within some single species on the same resource, such as *E. coli* strains on glucose. We also find no evidence for tradeoffs between growth rate at low versus high resource concentrations. To better understand the potential causes of this variation, we model evolution for populations with a single limiting resource under feast-and-famine conditions (batch dynamics with fixed biomass or fixed dilution factor) and steady-state growth (chemostat dynamics). We show how demographic fluctuations, known as genetic drift, inhibit selection on lower half-saturation concentration, which leads to a general relationship between

the evolved half-saturation concentration, environmental resource concentration, and the effective population size. Using this result, we determine that populations with fixed-bottleneck batch dynamics will evolve half-saturation concentrations that are proportional to the environmental resource concentration, but populations with fixed-dilution batch dynamics evolve half-saturation concentrations that are practically independent of the environment. Besides providing a testable theory for laboratory evolution experiments, our results help to explain how species evolving under high concentrations can maintain fast growth at low concentrations and why evolved half-saturation concentrations may not reflect the environment of origin.

## RESULTS

### The Monod model quantifies growth rate response to resource concentration

Consider a population of microbes consuming a resource; we will generally focus on chemical nutrients such as carbon or nitrogen sources, but some aspects of the model apply to other types of resources as well (e.g., prey or light). While microbes consume many different resources simultaneously [32, 33], for simplicity here we assume only a single resource limits growth (Supplementary Information Sec. S1). The best-known dependence of population growth rate  $g$  on resource concentration  $R$  is the Monod model [7]:

$$g(R) = g^{\max} \cdot \frac{R}{R + K}, \quad (1)$$

where  $g^{\max}$  is the maximum growth rate — achieved when the resource is unlimited — and  $K$  is the concentration for the resource at which growth rate is slowed to half its maximum (Fig. 1). Decreasing the half-saturation concentration  $K$  therefore allows the population to grow faster at lower resource concentrations. The half-saturation concentration  $K$  is not to be confused with a related but distinct concept of  $R^*$  from resource-ratio theory [10, 12]. Note that the Monod model of Eq. (1) is used to describe both steady state [12] and non-steady-state [25, 28] relationships between growth rate and environmental resource concentration. While there are many alternative models of how growth rate depends on resource concentration (Supplementary Information Sec. S2, Table S1), we focus on the Monod model due to its wider usage and available data.

The parameter  $K$  is sometimes labeled as the affinity for the resource [34], but this is potentially misleading as  $K$  is inversely proportional to ability to grow on the resource. We instead use the term *specific affinity* to refer to the parameter combination  $g^{\max}/K$ , which measures how much the growth rate increases per unit change in resource concentration, starting from a low concentration [35]. The specific affinity is therefore a common

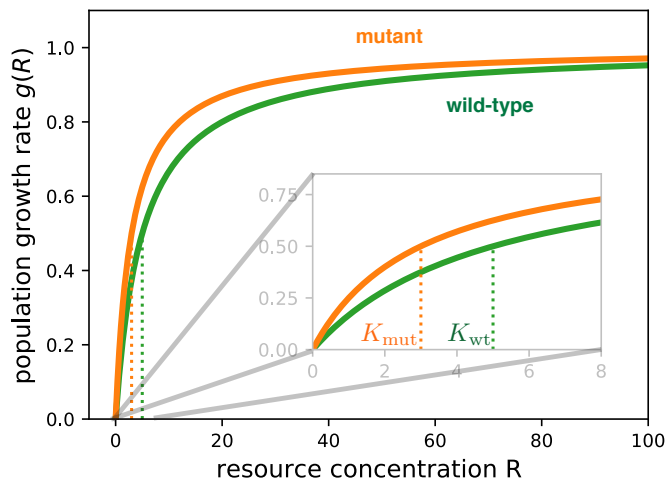

FIG. 1. **Monod model of growth rate response to resource concentration.** The population growth rate  $g(R)$  as a function of the external resource concentration  $R$  for two hypothetical strains: a wild-type (green) and a derived mutant strain (orange), with equal maximum growth rates ( $g^{\max} = 1$ ) but different half-saturation concentrations ( $K_{wt} = 5$ ,  $K_{mut} = 3$ ). The inset shows a magnified view at low concentrations near  $K_{wt}$  and  $K_{mut}$  (dotted vertical lines). Note that the growth rates do not fully overlap at the highest concentration shown, but eventually converge to the same value  $g^{\max}$  outside the range of this plot.

measure for oligotrophic growth ability [9, 16, 19, 34]. Note that both  $K$  and  $g^{\max}$  are required to fully characterize the growth rate dependence; for example, the specific affinity  $g^{\max}/K$  alone does not suffice because while it describes the growth rate response at low concentrations, it does not define the range of low concentrations (which is determined separately by  $K$ ). Since we are primarily interested in how these traits evolve in relation to the environmental concentration  $R$ , we focus primarily on the half-saturation concentration  $K$  since one can directly compare it to  $R$ .

One can derive the Monod model of Eq. (1) by modeling biomass growth as a two-step process, in which uptake of the external resource into the cell occurs at a rate proportional to the external concentration  $R$  [36]. However, the dependence of growth rate on resource concentration expressed by Eq. (1) is surprisingly robust to additional model complexities [37, 38], albeit with the resulting traits  $g^{\max}$  and  $K$  being emergent properties of whole cells or populations. In particular, the half-saturation concentration  $K$  is not equivalent to the Michaelis-Menten constant for resource uptake kinetics [37, 39, 40], despite the mathematical similarity between the Michaelis-Menten and Monod models (Eq. 1); this is because the Monod model describes the whole process of producing new biomass, of which uptake is just one step.

### Half-saturation concentrations vary widely across resources and organisms

To explore the diversity of microbial growth responses, we have compiled 247 measurements of half-saturation concentrations  $K$  from previously-published studies (Methods; Dataset S1; Fig. S1), substantially extending previous surveys [41–44]. Figure 2A shows an overview of this data, sorted by resource. The data includes a wide range of resources, with phosphate, glucose, and nitrate having the largest number of measurements due to their emphasis in marine and laboratory systems. Organisms include prokaryotes and eukaryotes as well as autotrophs and heterotrophs (marked by different symbols in Fig. 2A).

Measured values of the half-saturation concentration  $K$  vary over several orders of magnitude, ranging from below  $10^{-6}$   $\mu\text{M}$  (for thiamine and vitamin B12) to above  $10^4$   $\mu\text{M}$  (for one glucose measurement). This variation is not attributable to measurement uncertainties, which never exceeded 20% in the studies that reported them. It also is not an artifact of technical aspects of the measurements (Fig. S2) such as temperature (linear regression,  $R^2 \approx 0.089$ ,  $p \approx 1.2 \times 10^{-5}$ ) or experimental method (linear regression,  $R^2 \approx 0.160$ ,  $p \approx 1.3 \times 10^{-3}$ ), nor does the variation appear to be systematically biased by experimental design such as the degree of pre-acclimation to the growth medium (Fig. S3). We furthermore find no evidence for a major bias from simultaneous limitation (colimitation) for other resources besides the focal resource (Supplementary Information Sec. S1).

Instead, most variation of concentrations  $K$  corresponds to variation in the identity of the organisms and resources themselves (Fig. S2A). Figure 2B shows a subset of measurements on glucose, which have systematic differences in  $K$  between taxa. For example, measurements of *S. cerevisiae* and *Streptococcus* almost all have  $K$  values higher than those of *E. coli* (Mann-Whitney U test,  $p \approx 1.40 \times 10^{-6}$ ). Phosphate and silicate similarly show significant variation between species (Fig. 2C,D), as do nitrate and ammonium (Fig. S4). Even within some taxa, there is large variation of  $K$ ; glucose  $K$  in *E. coli* varies over three orders of magnitude (Fig. 2B). This variation within a single resource and taxon does not appear to be explained by technical covariates of the measurements (Fig. S2B), but rather corresponds to genetically-distinct strains of *E. coli* (Fig. S5), suggesting that even subspecies-level genetic variation can lead to significant differences in the half-saturation concentration  $K$ . Indeed, Ferenci [46] reported single target genes, like the membrane-associated lamB or the stress-factor rpoS, that affect the half-saturation concentration of *E. coli* on glucose when mutated. The genetic differences in our dataset are mostly unknown, but we grouped *E. coli* measurements by strain labels to find reproducible half-saturation concentrations for glucose within strains (e.g., ML 30, see Fig. S5A).

How can we explain this wide variation in half-

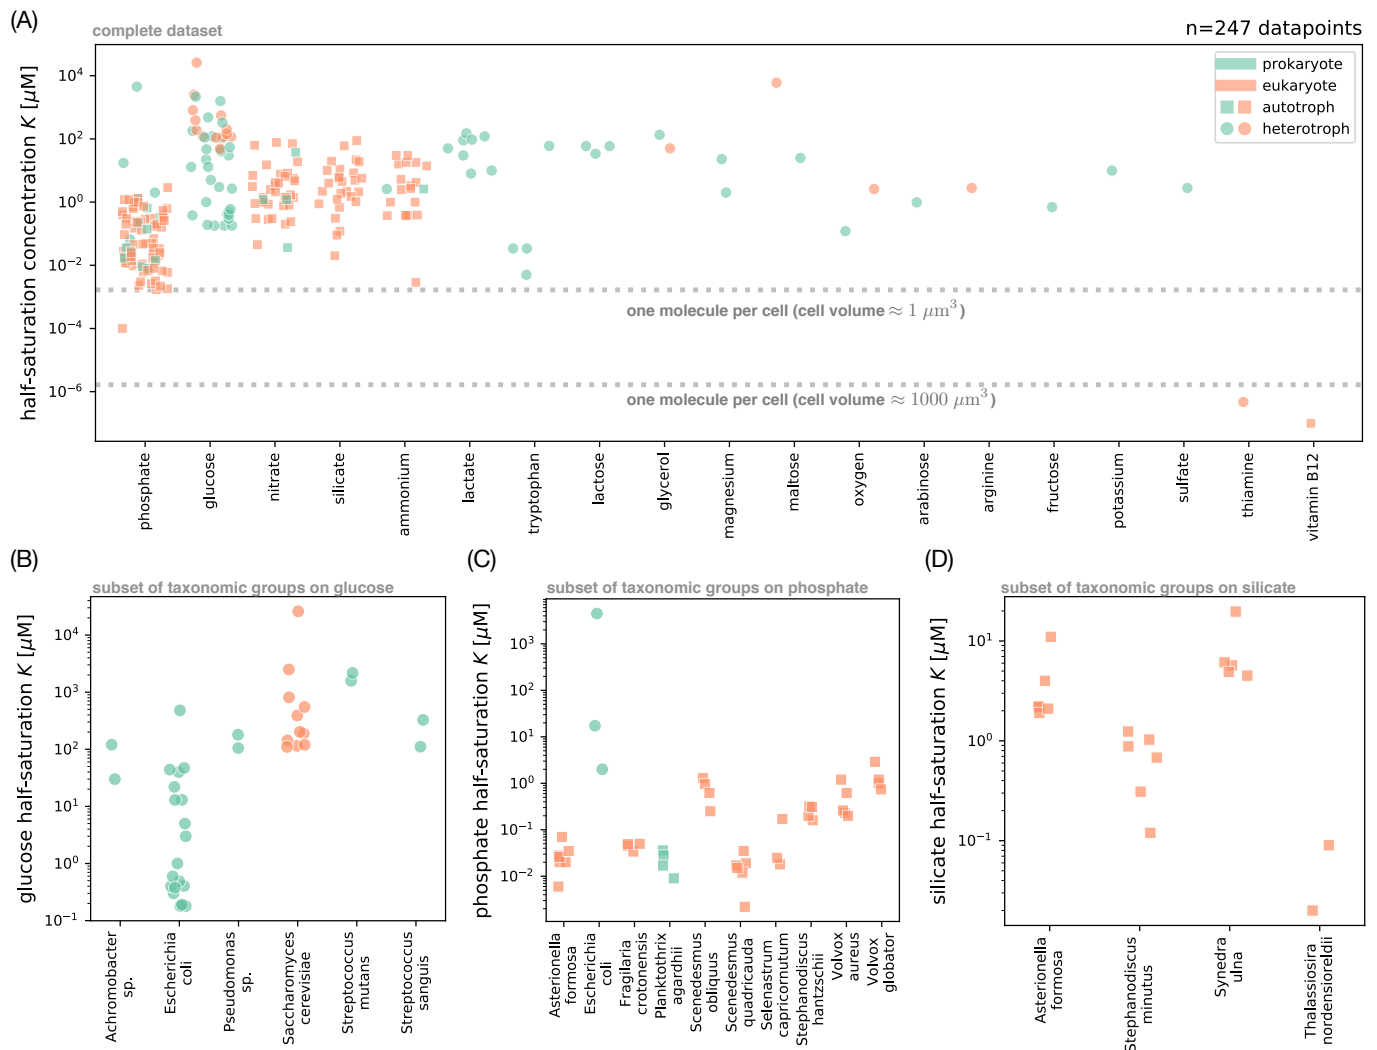

**FIG. 2. Survey of measured half-saturation concentrations.** (A) Complete set of half-saturation concentrations  $K$  for the Monod model of growth rate (Eq. (1)) in our survey, grouped by resource (in decreasing order of number of data points). Each point represents a different measurement; color indicates whether the organism is a prokaryote (green) or eukaryote (orange), and shape indicates whether the organism can grow as an autotroph (square) or only as a heterotroph (circle). Dashed lines mark concentrations of one molecule per cell for approximate prokaryotic and eukaryotic cell volumes [45]. (B) Subset of  $K$  measurements from panel A for glucose, grouped by taxon (only those with at least two measurements). We use the taxonomic identity given in the original publications, where an ending in *sp.* means the isolate is a representative of the genus but was not identified at the species level. Symbols are the same as in panel A. For brevity, we use “glucose half-saturation” to refer to the half-saturation concentration for glucose as the limiting nutrient. (C) Subset of  $K$  measurements from panel A for phosphate, grouped by taxon (with at least three measurements). (D) Subset for silicate, grouped by taxon (with at least two measurements). See the Supplemental Information for additional plots with  $K$  measurements for nitrate (Fig. S4A) and ammonium (Fig. S4B).

saturation concentrations? Intuitively, we expect evolution to reduce  $K$ , since mutations that reduce  $K$  increase growth rate (Eq. (1)). For example, Fig. 1 shows the growth rate dependence for a hypothetical wild-type strain (green line) and a mutant (orange) with lower half-saturation  $K$ . Since the mutant has a greater relative growth rate advantage at low resource concentrations, there could be stronger selection pressure to reduce  $K$  at those low concentrations. This is hinted by some patterns in the data: for example, *E. coli* often grows in

mammalian large intestines where there are few simple sugars such as glucose, while *S. cerevisiae* and *Streptococcus* often grow in high-sugar environments (fruit and the oral microbiome, respectively) [47, 48], which could explain their large difference in half-saturation concentrations for glucose.

### Variation in specific affinity has trends similar to those of the half-saturation concentration

Since  $K$  alone does not define the growth rate at low resource concentrations, it is essential to consider the maximum growth rate  $g^{\max}$  or specific affinity  $g^{\max}/K$  as well. We show the variation in maximum growth rate  $g^{\max}$  across resources in Fig. 3A (reported for 97.5% of all entries for half-saturation concentrations  $K$ ; Dataset S1). The most striking feature of this data is that while maximum growth rates  $g^{\max}$  vary less between resources than do half-saturation concentrations  $K$  (compare Figs. 3A and 2A), there is a clear bimodality between fast-growing heterotrophs (circles) and slow-growing autotrophs (squares). Indeed, a closer look at the covariation between  $g^{\max}$  and  $K$  in autotrophs (squares in Fig. 3B) reveals that resources have comparable distributions of  $g^{\max}$  but stratify in terms of half-saturation concentrations  $K$ , with the lowest values for phosphate. In particular, the distributions for phosphate and nitrate are indistinguishable in terms of maximum growth rate (Mann-Whitney U test,  $p = 0.0801$ ), but clearly different in terms of half-saturation concentration (Mann-Whitney U test,  $p = 1.28 \times 10^{-12}$ ). Also, the species differences in maximum growth rate on glucose and phosphate are less pronounced (Fig. S6) and more of the variation can be explained by experiment temperature (Figs. S7 and S8) compared to variation in  $K$ .

We can also compute the specific affinity  $g^{\max}/K$  for each data point. Figure S9 shows that the variation in specific affinity is similar to variation in  $K$ : the variation spans orders of magnitude, even for single species, and there are systematic differences between taxa (e.g., *E. coli* compared to *S. cerevisiae* and *Streptococcus*; Mann-Whitney U test,  $p \approx 1.20 \times 10^{-6}$ ; Fig. S9B). The similarity in patterns of variation between the half-saturation concentration and specific affinity is because variation in  $g^{\max}/K$  is dominated by variation in  $K$  (Fig. S7B); on a logarithmic scale,  $g^{\max}/K$  depends on additive contributions from  $g^{\max}$  and  $K$ , and variation in  $K$  is much larger than variation in  $g^{\max}$  (compare Figs. 2A and 3A).

### There is no evidence for a tradeoff between half-saturation concentration and maximum growth rate

Many previous studies have considered the possibility of tradeoffs between  $g^{\max}$  and  $K$  (positive correlation), such that genotypes growing faster with abundant resources will grow slower when resources are scarce [13, 25–28]. If this were true, evolution at high resource concentrations may select for increasing maximum growth rate  $g^{\max}$  at the expense of the half-saturation concentration  $K$ , leading to high values of  $K$ . If we consider all organisms and resources in our data set, we do find a significant positive correlation between  $g^{\max}$

and  $K$  (Spearman  $\rho \approx 0.39$ ,  $p \approx 5.7 \times 10^{-10}$ ; Fig. 3B). However, this correlation is an artifact of the biased sampling of organism-resource pairs, which are dominated by fast-growing heterotrophs on glucose (which tend to have higher concentrations  $K$ ) and slow-growing autotrophs on other resources (which tend to have lower concentrations  $K$  compared to glucose); the correlation disappears when we separate heterotrophs (Fig. S10A,B) from autotrophs (Fig. S10C,D). If we further separate individual resources, we see no significant correlations for phosphate, nitrate, ammonium, or glucose across organisms (Figs. 3C,D and S10E–H), while there is actually a negative correlation (opposite of a tradeoff) for silicate  $g^{\max}$  and  $K$  (Spearman  $\rho \approx -0.56$ ,  $p \approx 0.0025$ ; Fig. 3E). In Fig. 3F we test the covariation of  $g^{\max}$  with  $K$  for two individual species (*E. coli* and *S. cerevisiae*) for a single resource (glucose). The *E. coli* data shows a positive correlation indicative of a tradeoff, but it has modest magnitude and low statistical significance (Spearman  $\rho \approx 0.26$ ,  $p \approx 0.26$ ). *Saccharomyces cerevisiae*, on the other hand, shows a positive correlation between the two traits (Spearman  $\rho \approx -0.75$ ,  $p \approx 0.008$ ). The lack of tradeoff appears irrespective of experimental method (i.e., batch or chemostat; Fig. S3B) and also holds when comparing the maximum growth rate  $g^{\max}$  to the specific affinity  $g^{\max}/K$  (Fig. S11).

Much of the previous literature arguing for tradeoffs in these traits based their evidence on measurements for resource uptake kinetics [27, 28, 30, 49] rather than on population growth as we consider here. However, we find little to no correspondence between traits of uptake kinetics with traits of population growth in data points where we have measurements for both (Fig. S12) [44], consistent with previous analyses [37, 39]. It is therefore not surprising that the observed tradeoffs in uptake do not translate to tradeoffs in growth. For example, Litchman et al. [30] reported a tradeoff between uptake traits for nitrate, but we see no correlation in growth traits for nitrate (Spearman  $\rho \approx 0.03$ ,  $p \approx 0.84$ ; Figs. 3D and S11C). Altogether the absence of evidence for a systematic correlation between  $K$  and  $g^{\max}$  suggests that selection for  $g^{\max}$  does not explain the evolved variation in  $K$ .

### Models of population dynamics with mutations to half-saturation concentration

To test how the environmental resource concentration shapes the evolution of the half-saturation concentration  $K$ , we turn to a model of population dynamics with mutations altering traits of the Monod growth rate response (Methods; Supplementary Information Secs. S3–S5; Table S2). We consider a microbial population consisting of a wild-type and a mutant, with biomasses  $N_{\text{wt}}(t)$  and  $N_{\text{mut}}(t)$  that vary over time  $t$ . They grow at rates depending on the resource concentration  $R$  according to the Monod model (Eq. (1)), but with potentially different values of the traits  $g^{\max}$  and  $K$  depending on the

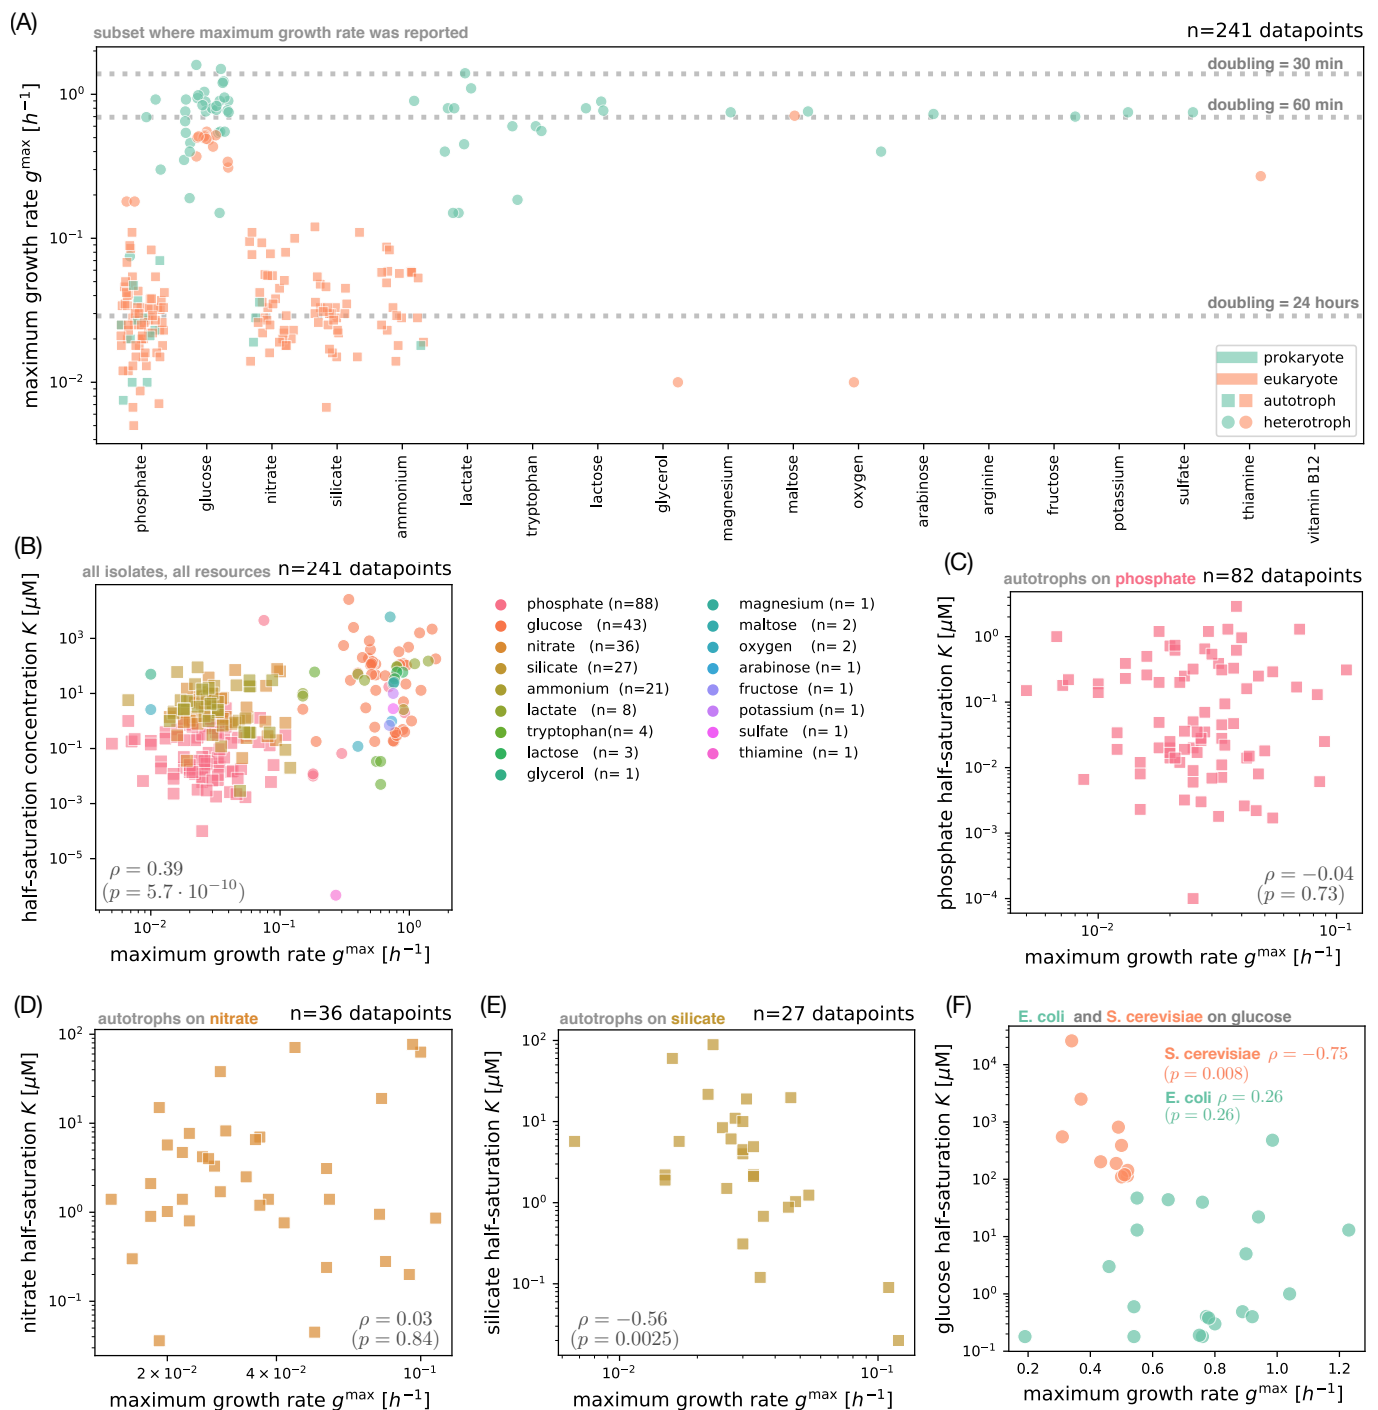

**FIG. 3. Survey of maximum growth rates and trait correlations.** (A) Empirical maximum growth rates  $g^{\max}$  for the microbial isolates in our survey. There are slightly fewer data points for maximum growth rate compared to half-saturation concentrations in Fig. 2A, since some publications only reported the half-saturation concentration. Markers indicate whether the organisms can grow as an autotroph (square) or only as a heterotroph (circle); colors indicate if the isolate is prokaryotic (green) or eukaryotic (orange). Dashed lines mark reference doubling times. (B) Covariation of maximum growth rate  $g^{\max}$  and half-saturation concentration  $K$  across the entire set of isolates from panel A. Here colors indicate the limiting resource, with the number of measurements  $n$  given in parentheses. Marker shapes (squares are autotrophs, circles are heterotrophs) are the same as in panel A. We compute the Spearman rank correlation  $\rho$  and  $p$ -value across the pooled set of isolates. (C) Subset of measurements from panel B for phosphate (only autotroph isolates shown). (D) Subset of measurements from panel B for nitrate. (E) Subset of measurements from panel B for silicate. (F) Covariation between maximum growth rate  $g^{\max}$  and half-saturation concentration  $K$  on glucose for measurements of *E. coli* (green) and *S. cerevisiae* (orange), with Spearman rank correlations  $\rho$  and  $p$ -values by species.

effect of the mutation [25, 28]. The rate at which the mutant increases or decreases in frequency compared to the wild-type is given by the selection coefficient  $s$  (Supplementary Information Sec. S6) [50, 51]. We show that  $s$  decomposes into two additive terms

$$s \approx s_{\text{high}} + s_{\text{low}}, \quad (2)$$

where  $s_{\text{high}}$  measures selection on growth at high resource concentrations, and is therefore proportional to variation in the maximum growth rate  $g^{\text{max}}$ , while  $s_{\text{low}}$  measures selection on growth at low resource concentrations, and is therefore proportional to variation in the half-saturation concentration  $K$  (Figs. [S13, S16], Supplementary Information Secs. S7–S9).

We consider selection in three prototypical regimes of population dynamics. In the first case, the population grows as a batch culture with serial transfers (Supplementary Information Sec. S3). That is, there is an initial concentration  $R_0$  of the resource, and the population grows until the resource is exhausted. Figure [4A] shows these dynamics for the hypothetical wild-type and mutant strains of Fig. [1]. Although the mutant has the same maximum growth rate  $g^{\text{max}}$  as the wild-type, its lower value of  $K$  allows it to continue growing fast at lower concentrations of the resource, decelerating more abruptly at the end of growth (see inset of Fig. [4A] for more dramatic examples). Then a fixed amount of biomass  $N_0$  — sampled from the whole culture, so that the relative frequencies of the mutant and wild-type are preserved on average — is transferred to a new environment with the same initial concentration  $R_0$  of the resource as before, and the cycle repeats (Fig. [4B], top panel). This dilution step represents a form of mortality for the population. We refer to this regime as *fixed-bottleneck batch dynamics*, since the bottleneck of biomass between transfers is held fixed. Boom-bust dynamics such as these are believed to be common in some natural environments [52, 53], with a fixed bottleneck size being plausible for populations that serially colonize new environments [54] or are reset to a fixed density by culling [4] between cycles of growth.

The second regime is the same as the first, except instead of transferring a fixed amount of biomass to the next cycle, we transfer a fixed fraction  $1/D$ , where  $D$  is the dilution factor (Fig. [4B], bottom panel); we therefore refer to this regime as *fixed-dilution batch dynamics*. Note that the dilution factor  $D$  and the bottleneck biomass  $N_0$  are related according to  $D = R_0 Y / N_0 + 1$ , where  $Y$  is the yield (biomass produced per unit resource; Supplementary Information Sec. S3). These dynamics are plausible for populations that experience a constant death rate between growth cycles or are regularly purged by the environment, as believed to occur in the human gut microbiome [55]. This case is also the most common protocol in laboratory evolution experiments owing to its simplicity [56]. While the differences between these two regimes of batch dynamics may appear to be subtle (comparing the two panels of Fig. [4B]), we will show

later that these two dilution protocols have different dependences on the resource concentration, which lead to different evolutionary outcomes.

Finally, we also consider the regime of *chemostat dynamics*, where the population grows as a continuous culture with a constant supply of the resource and a constant dilution rate  $d$  (Supplementary Information Sec. S5). Chemostats are used as devices for experimental evolution [12, 22] and the same dynamics are often applied to describe natural populations in the ocean [13, 57].

### Selection quantifies variation in growth traits between isolates at different resource concentrations

We previously observed wide variation in half-saturation concentrations  $K$  (Fig. [2A]) and maximum growth rates  $g^{\text{max}}$  (Fig. [3A]) across isolates, but the significance of this variation is difficult to assess by itself. For example, glucose  $K$  for *E. coli* varied across four orders of magnitude, but how significant is this variation for evolution? Our model of selection under different population dynamics gives us precisely the metric to quantify this variation. We demonstrate this in Fig. [4C] by calculating the two components of selection (Eq. [2]) for hypothetical competitions between all pairs of *E. coli* isolates measured on glucose. We do this for batch dynamics starting at different initial concentrations  $R_0$  of glucose. While selection on variation in  $g^{\text{max}}$  ( $s_{\text{high}}$ ) always increases with higher  $R_0$ , selection on variation in  $K$  ( $s_{\text{low}}$ ) depends non-monotonically on the concentration  $R_0$ , such that selection is maximized at some intermediate concentration (Fig. [S17], Supplementary Information Sec. S10). Intuitively, this optimal concentration approximately equals the half-saturation concentration  $K$  itself (Fig. [S17C]). On the other hand, if the resource concentration  $R_0$  also increases the initial population size  $N_0$  (i.e., transfer from a pre-growth cycle with fixed dilution factor), selection on variation in  $K$  depends monotonically on  $R_0$  and is maximized at the lowest concentration (Fig. [S18]).

We calculate selection between *E. coli* isolates at 10  $\mu\text{M}$  glucose, which is in the middle of the range of observed half-saturation concentrations  $K$ , as well as at two higher concentrations corresponding to the conditions of the *E. coli* LTEE (139  $\mu\text{M}$ ) [58] and a common laboratory concentration (11000  $\mu\text{M} \approx 0.2\%$  w/v). Figure [4C] indeed shows that variation in the value of  $K$  is highly significant for evolution at concentrations around the half-saturation concentration, whereas at the highest concentration, selection on the variation in  $K$  is small compared to the selection in  $g^{\text{max}}$ .

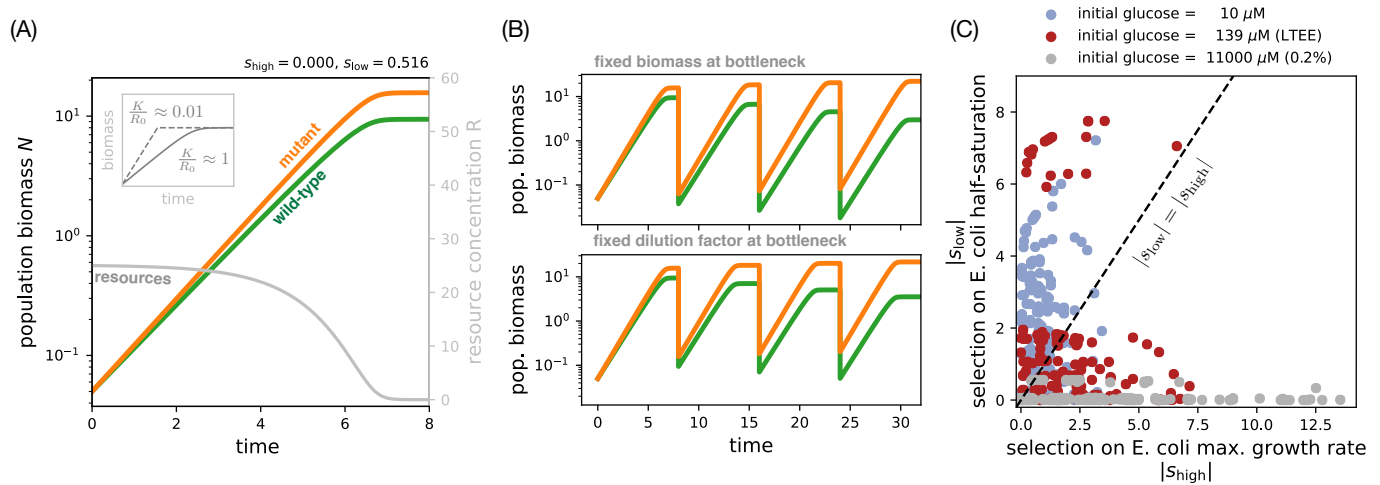

**FIG. 4. Selection on variation in half-saturation concentrations over batch population dynamics.** (A) Simulated growth of wild-type (green) and mutant (orange) strains competing under batch dynamics, with the transient resource concentration (gray) on the right vertical axis (Supplementary Information Sec. S3). The strain pair is the same as in Fig. 1, the initial resource concentration is  $R_0 = 25$ , with strains at equal initial frequencies and equal yields. (B) The same strain competition from panel A continued over multiple growth cycles under fixed-bottleneck batch dynamics (top panel,  $N_0 = 0.01$ ) and fixed-dilution batch dynamics (bottom panel,  $D = 100$ ). (C) Each point represents the predicted selection coefficients  $|s_{high}|$  and  $|s_{low}|$  (Eq. 2; Supplementary Information Sec. S8) for pairs of *E. coli* isolates with measured growth traits on glucose (from Fig. 2D). The three colors represent different glucose concentrations. We assume the isolates in each pair start competing at equal initial frequencies, set the initial cell density to  $N_0 = 4.6 \times 10^5$  cells/mL, and use a biomass yield of  $Y = 3.3 \times 10^8$  cells/ $\mu$ mol glucose measured by a previous study [23].

### The half-saturation concentration evolves downward over successive mutations

With our model of population dynamics, we can predict how the traits of the Monod growth rate response (Eq. 1) will evolve over long times. For simplicity, we focus on the “strong-selection weak-mutation” (SSWM) regime of evolutionary dynamics, where each new mutation either fixes or goes extinct before the next mutation arises (Fig. S19; Supplementary Information Sec. S11) [59].

We first simulate a population growing under fixed-bottleneck batch dynamics, with an initial half-saturation concentration  $K$  that is higher than the external resource concentration  $R_0$ ; the population therefore decelerates gradually into starvation over each growth cycle (Fig. 5A, left inset). Mutations then regularly arise and alter the value of  $K$  with a random effect size (Fig. S19; Supplementary Information Sec. S11). Each mutation stochastically fixes or goes extinct according to a fixation probability, which depends on the mutation’s selection coefficient. Over time these beneficial mutations accumulate and the half-saturation concentration  $K$  systematically decreases. By the end of the simulation, the half-saturation concentration  $K$  is 1000 times smaller than the resource concentration  $R_0$ , leading to growth curves that grow much faster and abruptly decelerate into starvation (Fig. 5A, right inset).

Such an abrupt arrest is, for example, realized by *E. coli* in glucose-limited batch culture through a dy-

namic surge in gene expression late in the growth cycle [60], often involving the use of separate transporters with lower Michaelis-Menten constants [61]. The presence of these transporter systems has been raised as evidence for evolutionary adaptation of the species at micromolar glucose concentrations [8, 61, 62]. But our model shows that a feast-and-famine environment dominated by concentrations orders of magnitude higher would still allow *E. coli* to evolve the low half-saturation concentrations  $K$  observed in existing strains.

### Adaptation in the half-saturation concentration stalls when it reaches selection-drift balance

The value of  $K$  does not evolve downward forever; in Fig. 5A adaptation slows down and the half-saturation concentration levels off after a few tens of thousands of mutations, even though there is no change in the supply of beneficial mutations. This occurs because selection on beneficial mutations is inhibited by random demographic fluctuations in the population, known as genetic drift [63]. The strength of genetic drift is measured by  $1/N_e$ , where  $N_e$  is the effective population size (for the variance in mutant frequency change per unit time) [64, 65]; smaller populations experience greater fluctuations. In the simplest cases,  $N_e$  is proportional to the actual (“census”) population size, but in more complex systems  $N_e$  may depend on other aspects of demography (such as spatial dynamics [66] or age structure [67])



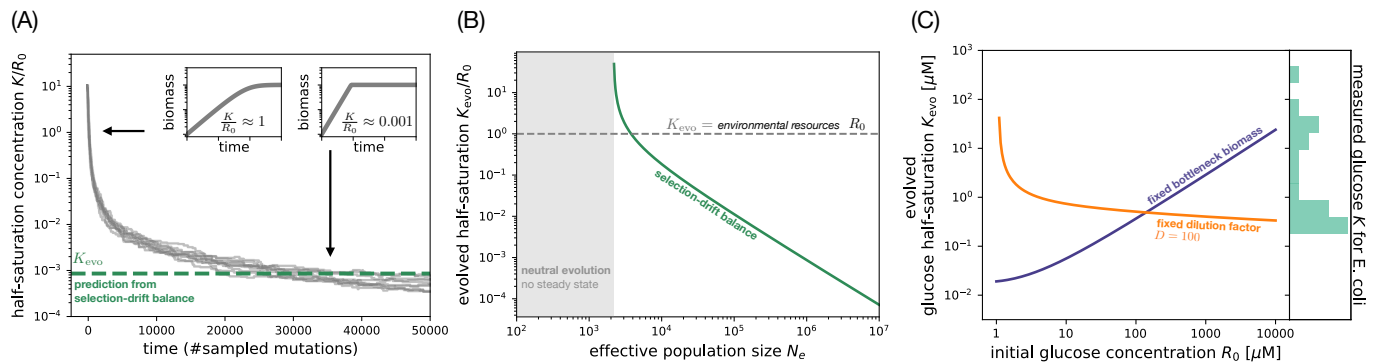

**FIG. 5. Evolution of the half-saturation concentration.** (A) The half-saturation concentration  $K$  evolving under fixed-bottleneck batch dynamics. Each gray line is one of 10 independent stochastic simulations using an effective population size  $N_e = 1000$  and mutation effects  $\kappa$  drawn from a uniform distribution (Supplementary Information Sec. S11). The insets show the growth curve in a single batch cycle before adaptation (left inset) and at the final state (right inset). The green dashed line marks our prediction  $K_{\text{evo}}$  at selection-drift balance. (B) Evolved half-saturation concentration  $K_{\text{evo}}$  as a function of the effective population size  $N_e$ . In the gray region, the effective population size is too small and all evolution is neutral. If  $N_e$  is sufficiently large (white region), the evolved half-saturation  $K_{\text{evo}}$  has selection-drift balance along the green line. Parameters are  $|\kappa_{\text{max}}| = 0.001$ ,  $g^{\text{max}} = 1$ ,  $N_0 = 0.01$ , and  $Y = 1$  for both strains. (C) The evolved glucose half-saturation  $K_{\text{evo}}$  as a function of initial glucose concentration  $R_0$  for two regimes of batch dynamics: fixed-bottleneck dynamics (blue line) and fixed-dilution dynamics (orange line). We use parameters based on the LTEE:  $N_0 = 4.6 \times 10^5$  cells/mL (for fixed-bottleneck case),  $D = 100$  (for fixed-dilution case),  $N_e = VN_0$  where  $V = 10$  mL,  $g^{\text{max}} = 0.888/\text{h}$ , and  $Y = 3.3 \times 10^8$  cells/ $\mu\text{mol}$  [23]. We also set  $\kappa_{\text{max}} = 6 \times 10^{-6}$  (Fig. S27). On the right axis is a histogram of glucose half-saturation  $K$  data for *E. coli* isolates (from Fig. 2B).

as well as additional sources of noise in the population dynamics [68].

Beneficial mutations will therefore no longer fix with high probability if their selection equals genetic drift, a condition known as selection-drift balance [69–71]:

$$s = \frac{1}{N_e}. \quad (3)$$

Selection-drift balance occurs in our model under batch dynamics because the growth deceleration phase becomes shorter as  $K$  decreases over evolution (insets of Figs. 4A and 5A), which means there is weaker selection to reduce it further. Once the half-saturation concentration  $K$  becomes sufficiently small, selection is no longer strong enough to overcome genetic drift (Supplementary Information Sec. S12; Fig. S20).

By combining Eqs. (2) and (3), we can calculate the value of the evolved half-saturation concentration at which selection-drift balance occurs (Fig. S21). For typical regimes of the parameters, the evolved concentration is approximately (Supplementary Information Sec. S13)

$$K_{\text{evo}} \approx \frac{R_0}{N_e |\kappa_{\text{max}}| \log(N_e |\kappa_{\text{max}}| R_0 Y / N_0)}, \quad (4)$$

where  $\kappa_{\text{max}}$  is the maximum effect size of a beneficial mutation reducing  $K$ . We calculate an example of  $K_{\text{evo}}$  in Fig. 5A (dashed green line), which corresponds well with the simulations. This result is robust to a wide range of effective population sizes and frequency-dependent effects (Fig. S22; Supplementary Information Sec. S11).

We also observe an equivalent result for the adaptation of the specific affinity  $g^{\text{max}}/K$  (Fig. S23; Supplementary Information Sec. S14) instead of the half-saturation concentration  $K$  alone.

One salient feature of Eq. (4) is that the evolved half-saturation concentration  $K_{\text{evo}}$  scales inversely with the effective population size  $N_e$ , as shown in Fig. 5B. That is, larger populations or those with lower genetic drift can evolve proportionally lower half-saturation concentrations  $K_{\text{evo}}$  that are orders of magnitude lower than the environmental resource concentration  $R_0$ . This potentially explains why we observe such low values of  $K$  for many organisms and resources (Fig. 2); this also explains why these half-saturation concentrations are difficult to measure from time-series data, since low half-saturation concentrations produce extremely abrupt deceleration at the end of growth (insets of Figs. 4A and 5A and Fig. S24; Supplementary Information Sec. S15). Hints of the influence of  $N_e$  are found in ammonia-oxidizing archaea and bacteria from marine environments, which tend to have lower half-saturation concentrations than isolates from soil [18]. Our scaling relationship Eq. (4) suggests that this ordering can arise from the smaller effective population size  $N_e$  for spatially-structured environments like soil.

The other important feature of Eq. (4) is the dependence of the evolved half-saturation concentration  $K_{\text{evo}}$  on the resource concentration  $R_0$ . For a fixed effective population size  $N_e$ , there is an optimal value of  $R_0$  that minimizes the evolved concentration  $K_{\text{evo}}$  (left insets of Fig. S21A,B), just as we observed for selection on individual mutations (Fig. S17). We note that for sufficiently

low values of the effective population size  $N_e$ , genetic drift is stronger than selection on any mutation  $\kappa$  (Fig. S20A), and so the half-saturation concentration  $K$  evolves neutrally (gray region in Fig. 5B).

In contrast to batch dynamics, selection under chemostat dynamics does not depend on the half-saturation concentration  $K$  itself (Supplementary Information Sec. S9). Intuitively, this is because reductions in  $K$  cause the environmental resource concentration to decrease proportionally (Supplementary Information Sec. S5), such that the growth rate remains constant. Not only does this keep a constant strength of selection on new mutations, but the effective population size will actually increase as  $K$  evolves lower, making beneficial mutations even easier to fix. Therefore selection-drift balance never occurs for  $K$  under chemostat dynamics; the half-saturation concentration  $K$  will continue to evolve downward until adaptation is limited by the supply of mutations or other factors (Discussion). Note that selection-drift balance also does not occur for mutations to the maximum growth rate  $g^{\max}$  under either batch or chemostat dynamics, since selection does not depend on the magnitude of growth rate (Supplementary Information Secs. S8 and S9).

### Population dynamics can decouple the evolved half-saturation concentration from the resource concentration

In general the effective population size  $N_e$  that controls genetic drift may be shaped by a variety of demographic factors besides the census population size [65]. However, in well-mixed batch cultures,  $N_e$  is primarily determined by the number of cells at the bottleneck of each transfer [69, 72]; we assume that other sources of stochasticity (such as individual cell division events) are much weaker than the sampling noise of these transfers. Therefore the effective population size  $N_e$  is proportional to the bottleneck biomass  $N_0$  (assuming constant biomass per cell).

Under fixed-bottleneck batch dynamics, the effective population size  $N_e$  is thus an independent parameter of the population, so that the strength of genetic drift does not depend on the resource concentration (Fig. S25A). In this case, the evolved trait  $K_{\text{evo}}$  is in approximately linear proportion to the resource concentration  $R_0$  (Eq. 4; Figs. 5C and S26A), making the evolved half-saturation concentration a biomarker of the resource's environmental concentration. This is consistent with our original speculation about the systematic differences in glucose  $K$  between *E. coli* and *S. cerevisiae*, owing to the different glucose availability in their different environments.

However, for fixed-dilution batch dynamics, the bottleneck biomass  $N_0$ , and therefore the effective population size  $N_e$ , are coupled to the resource concentration  $R_0$  because the dilution factor  $D$  is fixed:  $N_e \propto N_0 = R_0 Y / (D - 1)$  (Supplementary Information Sec. S3). This coupling occurs because increasing the resource

concentration increases the biomass at the end of each growth cycle, but then the fixed dilution factor means that this must also increase the biomass at the bottleneck. The scaling of  $N_e$  with  $R_0$ , though, cancels out the scaling of  $K_{\text{evo}}$  with  $R_0$  in Eq. 4, leading to an evolved half-saturation concentration  $K_{\text{evo}}$  that is approximately independent of the environmental concentration  $R_0$  (Figs. 5C and S26B). Conceptually, fixed-dilution batch dynamics do not allow the strength of selection to be tuned independently from genetic drift: the decrease in selection magnitude on  $K$  with higher resource concentration  $R_0$  is compensated by weaker genetic drift, due to a higher effective population size  $N_e$  (Fig. S25B). Thus, the population dynamics decouple the evolved half-saturation concentration of the organism from the environmental concentration.

This has major consequences for interpreting empirical variation. We predict the evolved half-saturation concentration  $K_{\text{evo}}$  for *E. coli* on glucose as a function of glucose concentration  $R_0$  in Fig. 5C, using parameters estimated from the LTEE (Fig. S27). On the same plot, we show a histogram of all measured glucose  $K$  values for *E. coli* (from Fig. 2B) on the right vertical axis. We see that, under fixed-bottleneck batch dynamics, we would expect *E. coli* to have evolved in glucose concentrations above 100  $\mu\text{M}$  to account for the observed half-saturation concentrations. However, under fixed-dilution batch dynamics, the evolved half-saturation concentration depends so weakly on the environmental concentration that almost any concentration of glucose is possible to explain the data.

## DISCUSSION

### Modeling insights to interpret half-saturation data

Since it is often difficult to measure resource concentrations and population dynamics in natural environments, can we use the evolved half-saturation concentration  $K$  as a biomarker to infer them? This logic is often implicit in environmental studies, which attempt to draw conclusions about the environmental conditions of an isolate based on its abilities to grow at different resource concentrations [16–19]. However, our model shows that it is not as simple as assuming the half-saturation concentration  $K$  for a resource is proportional to its concentration in the environment, since that proportionality is altered by the population dynamics, at least through the effective population size  $N_e$  (Eq. 4). In particular, this proportionality is confounded in the case of fixed-dilution batch dynamics, where the evolved half-saturation concentration  $K$  is largely independent of the resource concentration  $R_0$  (Fig. 5C).

Under fixed-bottleneck batch dynamics, though, the linear scaling of  $K$  with  $R_0$  does approximately hold. In this case, one can compare two populations with unknown, but identical effective population sizes  $N_e$  and

mutation effects  $\kappa$ ; for example, two isogenic populations located at different points along a resource gradient. In this case, one can calculate the ratio of evolved half-saturation concentrations  $K_{\text{evo}}$  for the two populations to estimate the ratio of resource concentrations. But in many scenarios, one might not even know the type of bottlenecks the population is experiencing. To classify the population dynamics as fixed-bottleneck or fixed-dilution, one could correlate a set of evolved concentrations  $K_{\text{evo}}$  with their different resource concentrations  $R_0$ ; a strong linear correlation would support fixed-bottleneck batch dynamics, while little to no correlation would indicate fixed-dilution batch or chemostat dynamics.

### Role of the mutation supply in shaping evolved half-saturation concentrations

We have focused on the role of selection-drift balance as a null model for the evolved variation in half-saturation concentrations, since the competition between selection and genetic drift is a universal feature of all evolving populations. In doing so we have assumed the supply of mutations on  $K$  is constant, but real populations will at some point run out of beneficial mutations on the trait value  $K$ , potentially reaching this mutation-selection balance before selection-drift balance [70]. Many mutations will also be pleiotropic, affecting both the half-saturation concentration  $K$  and the maximum growth rate  $g^{\text{max}}$  (as well as possibly other traits) simultaneously. The correlation between pleiotropic effects on both traits is important: if pleiotropy is synergistic, so that mutations that decrease  $K$  also tend to increase  $g^{\text{max}}$ , then the population might evolve lower  $K$  than otherwise expected since its selection is enhanced by additional selection on  $g^{\text{max}}$ . On the other hand, if there is a tradeoff between  $K$  and  $g^{\text{max}}$ , the population might evolve higher  $K$  if its selection is outweighed by selection for higher  $g^{\text{max}}$ . Indeed, this is what appears to have happened in the LTEE, where  $K$  for glucose actually increased over the first 2000 generations, but that was offset by a stronger improvement in the maximum growth rate  $g^{\text{max}}$  [23].

Such a tradeoff between  $K$  and  $g^{\text{max}}$  is interesting both for its consequences on the stoichiometric composition of community biomass [49, 73] as well as from an evolutionary point of view, since the population can then diversify into stably-coexisting lineages. While there is significant theoretical work on this hypothesis [25–28], it has limited empirical evidence. Some of these previous studies claiming tradeoffs found them only in parameters for the Michaelis-Menten model of resource uptake [27, 28, 30, 49, 74], which we and others have shown are not equivalent to parameters of the Monod model of growth (Fig. S12) [37, 39]. In the larger set of data we have collected in this work (Fig. 3F), we find no compelling evidence of a correlation; *E. coli* shows a weak but

insignificant tradeoff, while *S. cerevisiae* shows a slight synergy [75].

Interpretation of this tradeoff (or lack thereof) is also complicated by the sample of strains and environmental conditions being considered. For the tradeoff to affect the evolved half-saturation concentration as we have discussed, the tradeoff must exist across the entire spectrum of spontaneous mutations available to an organism (i.e., there is an underlying physiological constraint). This has also been the underlying assumption of previous models on this topic [25–28]. Testing this would require a distribution of  $K$  and  $g^{\text{max}}$  values over a large mutant library in a single environment, which has not been measured to our knowledge. An experimental study in *E. coli* [31] reports a tradeoff between half-saturation concentration  $K$  and maximum growth rate  $g^{\text{max}}$ , but this screen was restricted to mutations in the single gene *lamB*, which may not be representative of genome-wide mutations. However, even in the absence of an underlying correlation in mutation effects, such a tradeoff could still emerge across clones within a rapidly evolving population, at least transiently [76, 77]. Further systematic measurements of these traits within and between populations will be necessary to resolve the issue of a tradeoff in the future.

### Other factors shaping evolved half-saturation concentrations

Besides mutation supply, there are other phenomena that may lead to different evolved outcomes for the half-saturation concentration  $K$ . One important assumption in our model is that we only consider a single resource, whereas real populations are dependent on several resources [78], including those from biotic sources such as cross-feeding and predation. Some of these resources may be rarely or never limiting, and therefore their half-saturation concentrations  $K$  will evolve only as byproducts of selection on mutations for other traits. In this sense many observed half-saturation values may actually be spandrels, an evolutionary term (defined in analogy with the architectural structure) for traits that evolve for reasons other than direct selection [79]. Selection for other traits may occur simply because competition in natural environments is likely more complex and could include lag phases [51] and other strategies for low-resource survival [5, 80–82]. On the other hand, multiple resources could also be simultaneously colimiting [32, 33]. While we have shown how colimitation under measurement conditions affects estimates of  $g^{\text{max}}$  and  $K$  (Supplementary Information Sec. S1), the effect of colimitation, as well as more complex sources of nutrients such as cross-feeding and predation, on the evolution of these traits remains an important problem for future work.

We can predict the consequences of relaxing other assumptions in our model as well. For example, simultaneous competition of multiple mutations (clonal interfer-

ence) generally reduces the efficacy of selection [83, 84], which would make it more likely to evolve higher half-saturation concentrations than what we predict from SSWM dynamics. Another assumption in our model is that the population under batch dynamics always grows until complete exhaustion of the resources during each cycle, but earlier transfers could reduce the amount of growth occurring during deceleration, which would reduce selection on the half-saturation  $K$ . However, the population may adapt its maximum growth rate to simply saturate earlier and restore selection on its deceleration phase. Finally, populations may also have higher than expected  $K$  values if they simply have not had enough time to reach selection-drift balance, which takes a timescale of order  $N_e$  generations (Fig. S22) [85].

### Population dynamics are essential for understanding microbial ecology

Broadly speaking, our results provide a valuable example of how ecological traits are influenced by factors other than abiotic environmental features. In particular, we have shown how population dynamics can confound our naive expectations for the evolutionary fate of such traits. While here we have focused on the role of genetic drift, other potentially important factors include mutation supply, pleiotropy, recombination, and spatial structure. Altogether our results mean that the half-saturation concentration  $K$  may not be a reliable biomarker of environmental resource concentrations. This does not mean that  $K$  evolves independently of the environment, however. Rather, it is linked to additional environmental processes like the bottleneck between growth cycles. To understand the systematic differences between species, we need to know not only the resource concentrations they have evolved in, but also which type of population dynamics best reflects the time scales of growth, death, and resource supply in their environment of origin.

## Materials and Methods

### Literature survey of measured growth rate dependence on resources

We collected 247 measurements of Monod model parameters ( $K$  and  $g^{\max}$ ; Eq. (1)) through a targeted literature search that included prior surveys and reviews [41, 43], the phytoplankton trait database (130 data points) by Edwards et al. [44], as well as original research papers. In all but two cases, we traced data from surveys and reviews back to their original papers, which we report in Dataset S1 (sheet 1). We included only experiments that directly measured population growth rates, rather than nutrient uptake rates or respiration. We excluded measurements where the actual limiting resource was unclear, such as measurements in rich medium with added glucose. Where possible we checked the raw data of growth rate over resource concentrations to determine if the focal resource concentration was measured up to saturation and had sufficient sampling of concentrations around  $K$ . For a subset of measurements of *E. coli* on glucose, we also checked for the concentration of a nitrogen source to determine the relative impact of colimitation (Dataset S1, sheet 2; Supplementary Information Sec. S1). If the original  $K$  value was reported as weight per volume, we converted these into units of micromolar ( $\mu\text{M}$ ) using the calculated molecular weight of the compound's chemical formula. We preserved significant digits from the original studies. See Dataset S1 for more details.

### Models of population dynamics

We mathematically model population dynamics using systems of ordinary differential equations for the wild-type and mutant biomasses as well as the extracellular resource concentration (Supplementary Information Secs. S3 and S5). We numerically integrate these equations using standard algorithms in Scipy [86] (Supplementary Information Sec. S4).

- 
- [1] M. Schaechter, J. L. Ingraham, and F. C. Neidhardt. *Microbe*. ASM Press, Washington, DC, 2006.
  - [2] T. E. Shehata and A. G. Marr. Effect of nutrient concentration on the growth of *Escherichia Coli*. *Journal of Bacteriology*, 107:210–216, 1971.
  - [3] Nicolai S. Panikov. *Microbial Growth Kinetics*. London: Chapman & Hall, 1995.
  - [4] David L. Kirchman. Growth rates of microbes in the oceans. *Annual Review of Marine Science*, 8:285–309, 2016.
  - [5] Jeanne S. Poindexter. *Oligotropy*, pages 63–89. Springer US, 1981.
  - [6] Noah Fierer, Mark A. Bradford, and Robert B. Jackson. Toward an ecological classification of soil bacteria. *Ecology*, 88:1354–1364, 2007.
  - [7] J. Monod. The growth of bacterial cultures. *Annu Rev Microbiol*, 3:371–394, 1949.
  - [8] Arthur L. Koch. The adaptive responses of *Escherichia coli* to a feast and famine existence. *Advances in Microbial Physiology*, 6:147–217, 1971.
  - [9] Don K. Button. Kinetics of nutrient-limited transport and microbial growth. *Microbiological Reviews*, 49:270–279, 1985.
  - [10] D. Tilman. *Resource competition and community structure*. Princeton University Press, Princeton, NJ, 1982.

- [11] T. E. Miller, J. H. Burns, P. Munguia, E. L. Walters, J. M. Kneitel, P. M. Richards, N. Mouquet, and H. L. Buckley. A critical review of twenty years' use of the resource-ratio theory. *Am Nat*, 165:439–448, 2005.
- [12] Joey R. Bernhardt, Pavel Kratina, Aaron Louis Pereira, Manu Tamminen, Mridul K. Thomas, and Anita Narwani. The evolution of competitive ability for essential resources. *Philosophical Transactions of the Royal Society B: Biological Sciences*, 375(1798):20190247, 2020.
- [13] James P. Grover. *Resource Competition*. Springer US, 1997.
- [14] Emilio Maraño, Pedro Cermeño, María Huete-Ortega, Daffne C. López-Sandoval, Beatriz Mouriño-Carballido, and Tamara Rodríguez-Ramos. Resource Supply Overrides Temperature as a Controlling Factor of Marine Phytoplankton Growth. *PLOS ONE*, 9(6):e99312, 2014.
- [15] Erik Askov Mousing, Katherine Richardson, and Marianne Ellegaard. Global patterns in phytoplankton biomass and community size structure in relation to macronutrients in the open ocean. *Limnology and Oceanography*, 63:1298–1312, 2018.
- [16] Willm Martens-Habbena, Paul M. Berube, Hidetoshi Urakawa, José R. de la Torre, and David A. Stahl. Ammonia oxidation kinetics determine niche separation of nitrifying archaea and bacteria. *Nature*, 461:976–979, 2009.
- [17] James I. Prosser and Nicol W. Graeme. Archaeal and bacterial ammonia-oxidisers in soil: The quest for niche specialisation and differentiation. *Trends in Microbiology*, 20:523–31, 2021.
- [18] Dimitri K. Kits, Christopher J. Sedlacek, and Elena V. Lebedeva et al. Kinetic analysis of a complete nitrifier reveals an oligotrophic lifestyle. *Nature*, 549:269–272, 2017.
- [19] Man-Young Jung, Christopher J. Sedlacek, K. Dimitri Kits, Anna J. Mueller, Sung-Keun Rhee, Linda Hink, Graeme W. Nicol, and et al. Ammonia-oxidizing archaea possess a wide range of cellular ammonia affinities. *The ISME Journal*, 16:272–283, 2022.
- [20] Daniel Dykhuizen and Daniel Hartl. Evolution of competitive ability in *Escherichia coli*. *Evolution*, 35:581, 1981.
- [21] Karin Kovárová. *Growth Kinetics of Escherichia Coli: Effect of Temperature, Mixed Substrate Utilization and Adaptation to Carbon-Limited Growth*. PhD thesis, ETH Zurich, Zurich, Switzerland, 1996.
- [22] Julian Adams, Charlotte Paquin, Paul W. Oeller, and Lester W. Lee. Physiological characterization of adaptive clones in evolving populations of the yeast, *Saccharomyces cerevisiae*. *Genetics*, 110:173–185, 1985.
- [23] Farida Vasi, Michael Travisano, and Richard E. Lenski. Long-Term Experimental Evolution in *Escherichia coli*. II. Changes in Life-History Traits During Adaptation to a Seasonal Environment. *The American Naturalist*, 144(3):432–456, 1994.
- [24] Samuel Frederick Mock Hart, Chi-Chun Chen, and Wenying Shou. Pleiotropic mutations can rapidly evolve to directly benefit self and cooperative partner despite unfavorable conditions. *eLife*, 10:e57838, 2021.
- [25] Frank M. Stewart and Bruce R. Levin. Partitioning of Resources and the Outcome of Interspecific Competition: A Model and Some General Considerations. *The American Naturalist*, 107(954):171–198, 1973.
- [26] Antony M Dean. Protecting Haploid Polymorphisms in Temporally Variable Environments. *Genetics*, 169(2):1147–1156, 2005.
- [27] Robert E. Beardmore, Ivana Gudelj, David A. Lipson, and Laurence D. Hurst. Metabolic trade-offs and the maintenance of the fittest and the flattest. *Nature*, 472(7343):342–346, 2011.
- [28] Meike T. Wortel. Evolutionary coexistence in a fluctuating environment by specialization on resource level. *BioRxiv*, preprint:2021.05.18.444718, 2021.
- [29] Kai W. Wirtz. A generic model for changes in microbial kinetic coefficients. *Journal of Biotechnology*, 97(2):147–162, 2002.
- [30] Elena Litchman, Christopher A. Klausmeier, Oscar M. Schofield, and Paul G. Falkowski. The role of functional traits and trade-offs in structuring phytoplankton communities: scaling from cellular to ecosystem level. *Ecology Letters*, 10(12):1170–1181, 2007.
- [31] Justin R. Meyer, Ivana Gudelj, and Robert Beardmore. Biophysical mechanisms that maintain biodiversity through trade-offs. *Nature Communications*, 6(1):6278, 2015.
- [32] Mak A. Saito, Tyler J. Goepfert, and Jason T. Ritt. Some thoughts on the concept of colimitation: Three definitions and the importance of bioavailability. *Limnology and Oceanography*, 53(1):276–290, 2008.
- [33] S. W. Harpole, J. T. Ngai, E. E. Cleland, E. W. Seabloom, E. T. Borer, M. E. S. Bracken, J. J. Elser, D. S. Gruner, H. Hillebrand, J. B. Shurin, and J. E. Smith. Nutrient co-limitation of primary producer communities. *Ecol Lett*, 14:852–862, 2011.
- [34] Don K. Button. Affinity of organisms for substrate. *Limnology and Oceanography*, 31:435–456, 1986.
- [35] F P Healey. Slope of the Monod equation as an indicator of advantage in nutrient competition. *Microbial ecology*, 5(4):281–286, 1980.
- [36] R. V. O'Neill, D. L. DeAngelis, J. J. Pastor, B. J. Jackson, and W. M. Post. Multiple nutrient limitations in ecological models. *Ecol Modelling*, 46:147–163, 1989.
- [37] J. L. Snoep, M. Mrwebi, J. M. Schuurmans, J. M. Rohwer, and M. J.YR 2009 Teixeira de Mattos. Control of specific growth rate in *Saccharomyces cerevisiae*. *Microbiology*, 155(5):1699–1707, 2009.
- [38] S. Sharma and R. Steuer. Modelling microbial communities using biochemical resource allocation analysis. *J R Soc Inter*, 16:20190474, 2019.
- [39] David Tilman and Susan Soltau Kilham. Phosphate and Silicate Growth and Uptake Kinetics of the Diatoms *Asterionella Formosa* and *Cyclola Meneghiniana* in Batch and Semicontinuous Culture1. *Journal of Phycology*, 12(4):375–383, 1976.
- [40] François M. M. Morel. Kinetics of Nutrient Uptake and Growth in Phytoplankton. *Journal of Phycology*, 23(1):137–150, 1987.
- [41] J.D. Owens and J.D. Legan. Determination of the Monod substrate saturation constant for microbial growth. *FEMS Microbiology Letters*, 46(4):419–432, 1987.
- [42] H W Jannasch. Growth characteristics of heterotrophic bacteria in seawater. *Journal of Bacteriology*, 95(2):722–723, 1968.
- [43] Karin Kovárová-Kovar and Thomas Egli. Growth kinetics of suspended microbial cells: From single-substrate-controlled growth to mixed-substrate kinetics. *Microbiology and Molecular Biology Reviews*, 62:646–666, 1998.

- [44] Kyle F. Edwards, Christopher A. Klausmeier, and Elena Litchman. Nutrient utilization traits of phytoplankton. *Ecology*, 96(8):2311–2311, 2015.
- [45] Ron Milo and Rob Phillips. *Cell Biology by the Numbers*. Garland Science, Taylor Francis Group, 2016.
- [46] Thomas Ferenci. ‘growth of bacterial cultures’ 50 years on: Towards an uncertainty principle instead of constants in bacterial growth kinetics. *Research in Microbiology*, 150:431–38, 1999.
- [47] Huai-Feng Liu, Ben-Hong Wu, Pei-Ge Fan, Shao-Hua Li, and Lian-Sheng Li. Sugar and acid concentrations in 98 grape cultivars analyzed by principal component analysis. *Journal of the Science of Food and Agriculture*, 86:1526–36, 2006.
- [48] Zerihun T. Dame, Farid Aziat, Rupasri Mandal, Ram Krishnamurthy, and Souhaila Bouatra et al. The human saliva metabolome. *Metabolomics*, 11:1864–83, 2015.
- [49] Elena Litchman, Kyle F. Edwards, and Christopher A. Klausmeier. Microbial resource utilization traits and trade-offs: implications for community structure, functioning, and biogeochemical impacts at present and in the future. *Frontiers in Microbiology*, 6, 2015.
- [50] Chevin Luis-Miguel. On measuring selection in experimental evolution. *Biology Letters*, 7(2):210–213, 2011.
- [51] Michael Manhart, Bharat V. Adkar, and Eugene I. Shakhnovich. Trade-offs between microbial growth phases lead to frequency-dependent and non-transitive selection. *Proceedings of the Royal Society B: Biological Sciences*, 285(1872), 2018.
- [52] Michael J. Behrenfeld, Yongxiang Hu, Robert T. O’Malley, Emmanuel S. Boss, Chris A. Hostetler, David A. Siegel, Jorge L. Sarmiento, Jennifer Schulien, Johnathan W. Hair, Xiaomei Lu, Sharon Rodier, and Amy Jo Scarino. Annual boom–bust cycles of polar phytoplankton biomass revealed by space-based lidar. *Nature Geoscience*, 10(2):118–122, 2017.
- [53] David M. Needham, Cheryl-Emiliane T. Chow, Jacob A. Cram, Rohan Sachdeva, Alma Parada, and Jed A. Fuhrman. Short-term observations of marine bacterial and viral communities: patterns, connections and resilience. *The ISME Journal*, 7(7):1274–1285, 2013.
- [54] Tim N. Enke, Manoshi S. Datta, Julia Schwartzman, Nathan Cermak, Désirée Schmitz, Julien Barrere, Alberto Pascual-García, and Otto X. Cordero. Modular assembly of polysaccharide-degrading marine microbial communities. *Current Biology*, 29, 2019.
- [55] Jonas Cremer, Markus Arnoldini, and Terence Hwa. Effect of water flow and chemical environment on microbiota growth and composition in the human colon. *Proceedings of the National Academy of Sciences*, 114:6438–43, 2017.
- [56] J. E. Barrick and R. E. Lenski. Genome dynamics during experimental evolution. *Nat Rev Genet*, 14:827–839, 2013.
- [57] S. Dutkiewicz, M. J. Follows, and J. G. Bragg. Modeling the coupling of ocean ecology and biogeochemistry. *Global Biogeochemical Cycles*, 23(4), 2009.
- [58] Richard E. Lenski, Michael R. Rose, Suzanne C. Simpson, and Scott C. Tadler. Long-Term Experimental Evolution in *Escherichia coli*. I. Adaptation and Divergence During 2,000 Generations. *The American Naturalist*, 138(6):1315–1341, 1991.
- [59] J. H. Gillespie. Molecular evolution over the mutational landscape. *Evolution*, 38:1116–1129, 1984.
- [60] Anat Bren, Yuval Hart, Erez Dekel, Daniel Koster, and Uri Alon. The last generation of bacterial growth in limiting nutrient. *BMC Systems Biology*, 7(1):27, 2013.
- [61] Thomas Ferenci. Adaptation to life at micromolar nutrient levels: The regulation of *Escherichia coli* glucose transport by endoinduction and camp. *FEMS Microbiology Reviews*, 18:301–317, 1996.
- [62] J. W. Lengeler. Carbohydrate transport in bacteria under environmental conditions, a black box? *Antonie van Leeuwenhoek*, 63, 1993.
- [63] J. F. Crow and M. Kimura. *An Introduction to Population Genetics Theory*. Harper and Row, New York, 1970.
- [64] W. J. Ewens. *Mathematical Population Genetics*. Springer-Verlag, New York, 2004.
- [65] B. Charlesworth. Effective population size and patterns of molecular evolution and variation. *Nat Rev Genet*, 10:195–205, 2009.
- [66] O. Hallatschek, P. Hersen, S. Ramanathan, and D. R. Nelson. Genetic drift at expanding frontiers promotes gene segregation. *Proc Natl Acad Sci USA*, 104:19926–19930, 2007.
- [67] M. Shpak. Selection against demographic stochasticity in age-structured populations. *Genetics*, 177:2181–2194, 2007.
- [68] J. H. Gillespie. Natural selection for within-generation variance in offspring number II. Discrete haploid models. *Genetics*, 81:403–413, 1975.
- [69] M. Kimura. *The Neutral Theory of Molecular Evolution*. Cambridge University Press, Cambridge, 1983.
- [70] A. W. R. Serohijos and E. I. Shakhnovich. Merging molecular mechanism and evolution: Theory and computation at the interface of biophysics and evolutionary population genetics. *Curr Opin Struct Biol*, 26:84–91, 2014.
- [71] M. Lynch and K. Hagner. Evolutionary meandering of intermolecular interactions along the drift barrier. *Proc Natl Acad Sci USA*, 112:E30–38, 2015.
- [72] R. E. Lenski, M. R. Rose, S. C. Simpson, and S. C. Tadler. Long-term experimental evolution in *Escherichia coli*. I. Adaptation and divergence during 2,000 generations. *Am Nat*, 138:1315–1341, 1991.
- [73] Kevin J. Flynn, John A. Raven, T. Alwyn V. Rees, Zoe Finkel, Antonietta Quigg, and John Beardall. Is the Growth Rate Hypothesis Applicable to Microalgae? *Journal of Phycology*, 46(1):1–12, 2010.
- [74] Karin Elbing, Christer Larsson, Roslyn M. Bill, Eva Albers, Jacky L. Snoep, Eckhard Boles, Stefan Hohmann, and Lena Gustafsson. Role of Hexose Transport in Control of Glycolytic Flux in *Saccharomyces cerevisiae*. *Applied and Environmental Microbiology*, 70(9):5323–5330, 2004.
- [75] Naomi Ziv, Mark L. Siegal, and David Gresham. Genetic and Nongenetic Determinants of Cell Growth Variation Assessed by High-Throughput Microscopy. *Molecular Biology and Evolution*, 30(12):2568–2578, 2013.
- [76] K. Gomez, J. Bertram, and J. Masel. Directional selection rather than functional constraints can shape the G matrix in rapidly adapting asexuals. *Genetics*, 211:715–729, 2019.
- [77] Jie Lin, Michael Manhart, and Ariel Amir. Evolution of Microbial Growth Traits Under Serial Dilution. *Genetics*, 215(3), 2020.
- [78] M. Kaspari and J. S. Powers. Biogeochemistry and geographical ecology: embracing all twenty-five elements

- required to build organisms. *Am Nat*, 188:S62–S73, 2016.
- [79] S. J. Gould and R. C. Lewontin. The spandrels of San Marco and the Panglossian paradigm: A critique of the adaptationist programme. *Proc R Soc B*, 205:581–598, 1979.
- [80] Arthur L. Koch. Oligotrophs versus copiotrophs. *BioEssays*, 23(7):657–661, 2001.
- [81] R. Cavicchioli, M. Ostrowski, F. Fegatella, A. Goodchild, and N. Guixa-Boixereu. Life under Nutrient Limitation in Oligotrophic Marine Environments: An Eco/Physiological Perspective of *Sphingopyxix alaskensis* (Formerly *Sphingomonas alaskensis*). *Microbial Ecology*, 45(3):203–217, 2003.
- [82] Jana Grote, J. Cameron Thrash, Megan J. Huggett, Zachary C. Landry, Paul Carini, Stephen J. Giovannoni, and Michael S. Rappé. Streamlining and Core Genome Conservation among Highly Divergent Members of the SAR11 Clade. *mBio*, 3(5):e00252–12, 2012.
- [83] P. J. Gerrish and R. E. Lenski. The fate of competing beneficial mutations in an asexual population. *Genetica*, 102/103:127–144, 1998.
- [84] S. Schiffels, G. J. Szöllösi, V. Mustonen, and M. Lässig. Emergent neutrality in adaptive asexual evolution. *Genetics*, 189:1361–1375, 2011.
- [85] M. Kimura and T. Ohta. The average number of generations until fixation of a mutant gene in a finite population. *Genetics*, 61:763–771, 1969.
- [86] Pauli Virtanen, Ralf Gommers, Travis E. Oliphant, Matt Haberland, Tyler Reddy, David Cournapeau, Evgeni Burovski, Pearu Peterson, Warren Weckesser, Jonathan Bright, Stéfan J. van der Walt, Matthew Brett, Joshua Wilson, K. Jarrod Millman, Nikolay Mayorov, Andrew R. J. Nelson, Eric Jones, Robert Kern, Eric Larson, C J Carey, İlhan Polat, Yu Feng, Eric W. Moore, Jake VanderPlas, Denis Laxalde, Josef Perktold, Robert Cimrman, Ian Henriksen, E. A. Quintero, Charles R. Harris, Anne M. Archibald, Antônio H. Ribeiro, Fabian Pedregosa, Paul van Mulbregt, and SciPy 1.0 Contributors. SciPy 1.0: Fundamental Algorithms for Scientific Computing in Python. *Nature Methods*, 17:261–272, 2020.
- [87] Jacques Monod and A Audureau. Mutation et adaptation enzymatique chez *escherichia coli*-mutabile. In *Annales de l'Institut Pasteur*, volume 72, pages 868–878. Masson Editeur 120 Blvd Saint-Germain, 75280 Paris 06, France, 1946.

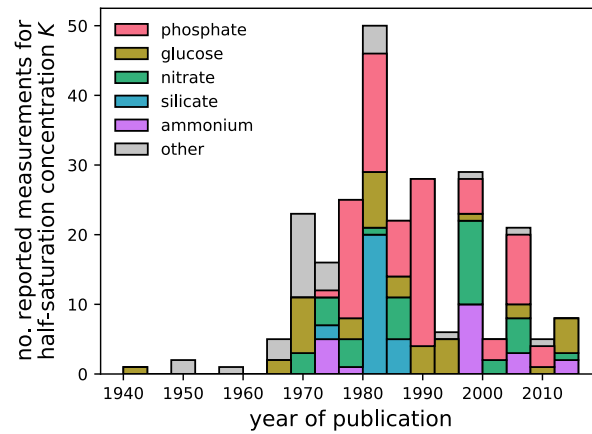

FIG. S1. **Historical trends of half-saturation concentration measurements.** The number of measured half-saturation concentrations  $K$  published in peer-reviewed journals aggregated by year, based on our literature survey (Dataset S1). Colors indicate the number of measurements for individual resources.

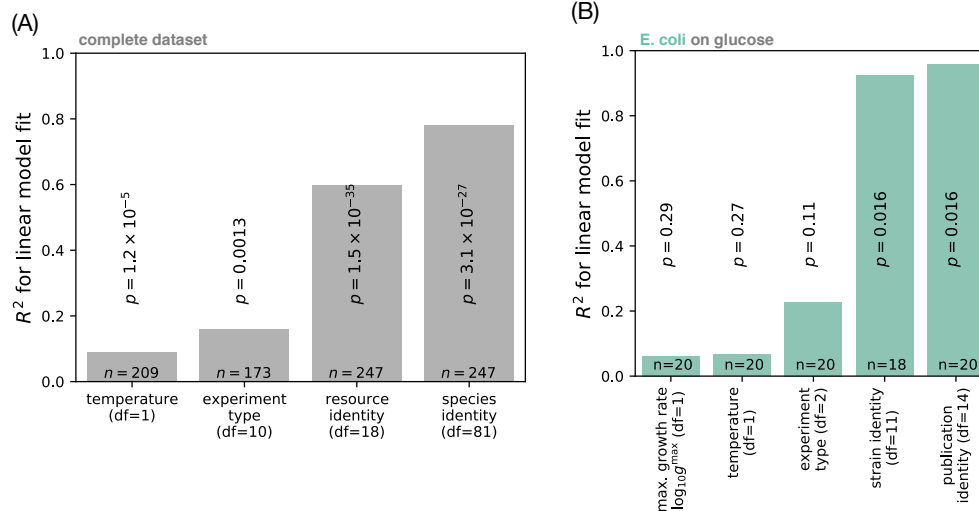

FIG. S2. **Comparison of technical covariates for the half-saturation concentration.** (A) Linear regressions of technical covariates against half-saturations  $\log_{10} K$  from the complete dataset (Fig. 2A), with degrees of freedom (df), number of data points ( $n$ ), and  $p$ -values indicated. Each bar represents a separate regression fit, where  $R^2$  measures the variation explained by a single variable as predictor for the half-saturation concentration. (C) Linear regressions of technical covariates against glucose half-saturations  $\log_{10} K$  for all *E. coli* measurements (shown in Fig. 2B).



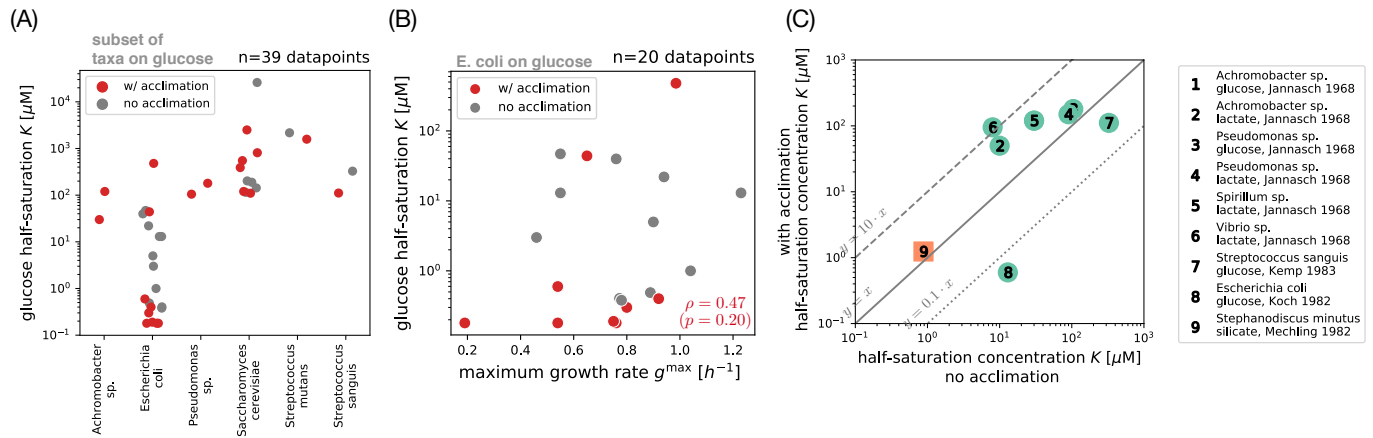

**FIG. S3. Comparison of half-saturation measurements with and without acclimation.** (A) Empirical half-saturation concentrations for glucose, grouped by taxon (only those with at least two measurements). The data shown here are identical to Fig. 2B, but colors indicate which measurements included a phase of acclimation (red). We infer acclimation from the type of experiments used to measure the half-saturation concentration: For *batch solid culture*, growth rate is inferred from the area increase of single cell colonies on agar plates. For *batch experiments*, the growth rate is observed from exponential phase of a liquid culture with varying initial resource concentration. For *chemostat experiments*, the residual resource concentration is observed in steady state with varying growth rate by tuning the rate of liquid outflow. For *serial transfer experiments*, the growth is only measured in exponential phase after multiple transfers. We consider measurements to be acclimated if they derive from chemostat or serial transfer experiments. (B) Covariation between maximum growth rate  $g^{\text{max}}$  and glucose half-saturation  $K$  for isolates of *E. coli*. The data shown here are identical to *E. coli* data points in Fig. 3F. We calculate the Spearman rank correlation  $\rho$  and  $p$ -value across all isolates with acclimation (red dots). (C) Pairwise comparison of half-saturation measurements before and after acclimation. We identify a subset of publications in our database (see legend) which have explicitly tested the effect of acclimation. Each publication has two measurements for the organism's half-saturation concentration  $K$  which we report together with full citations in our database (Dataset S1). A black diagonal line indicates exact match between measurements with and without acclimation, with diagonal lines in dashes ( $y = 10x$ ) and dots ( $y = 0.1x$ ) as visual guides for the eye.

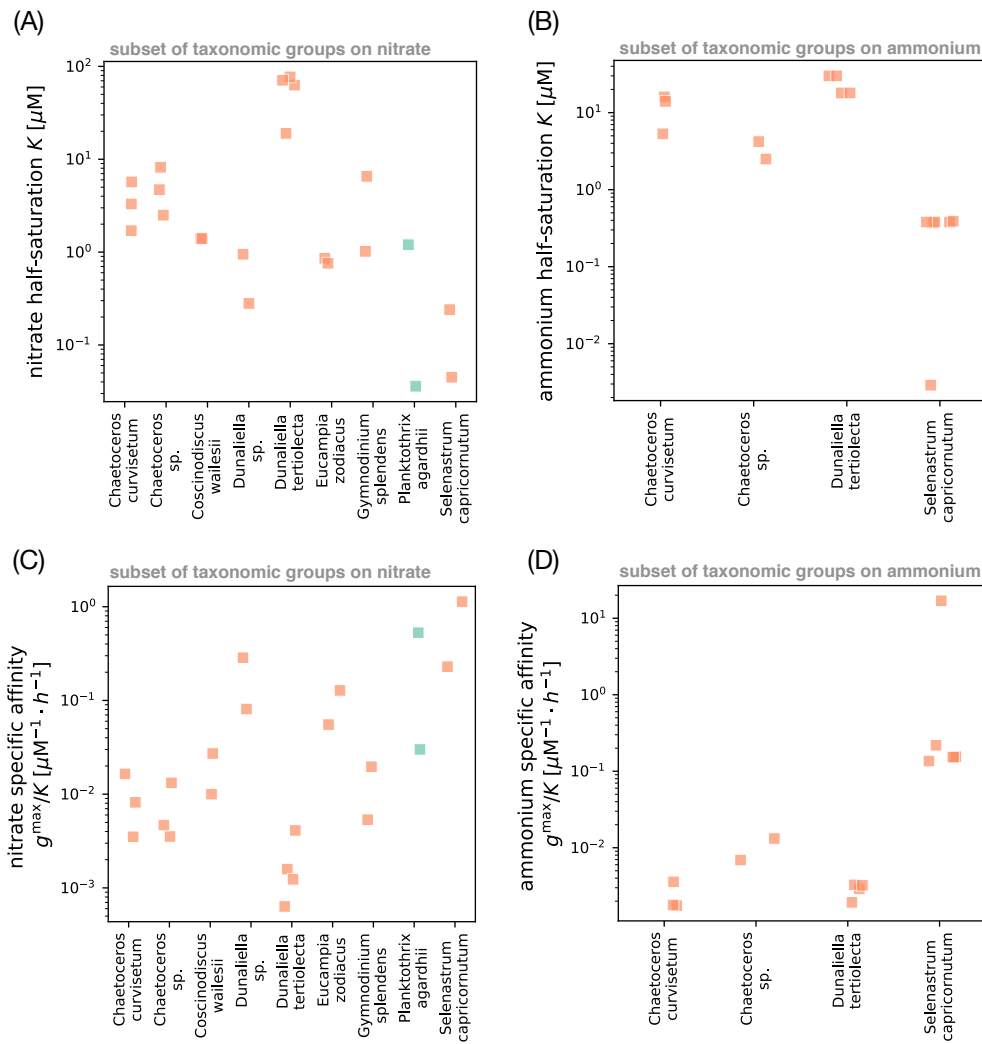

FIG. S4. **Survey of half-saturation concentrations and specific affinities for nitrate and ammonium in our survey.** (A) Subset of  $K$  measurements from Fig. 2A for nitrate, grouped by taxon (only those with at least two measurements). Symbols are the same as in Fig. 2A: Color indicates whether the organism is a prokaryote (green) or eukaryote (orange), and shape indicates whether the organism can grow as an autotroph (square) or only as a heterotroph (circle). We use the taxonomic identity given in the original publications, where an ending in *sp.* means the isolate is a representative of the genus but was not identified at the species level. (B) Subset of  $K$  measurements from Fig. 2A for ammonium, grouped by taxon (with at least two measurements). (C) Subset of  $g^{\text{max}}/K$  measurements from Fig. S9A for nitrate, grouped by taxon (with at least two measurements). (D) Subset of  $g^{\text{max}}/K$  measurements from Fig. S9A for ammonium, grouped by taxon (with at least two measurements).

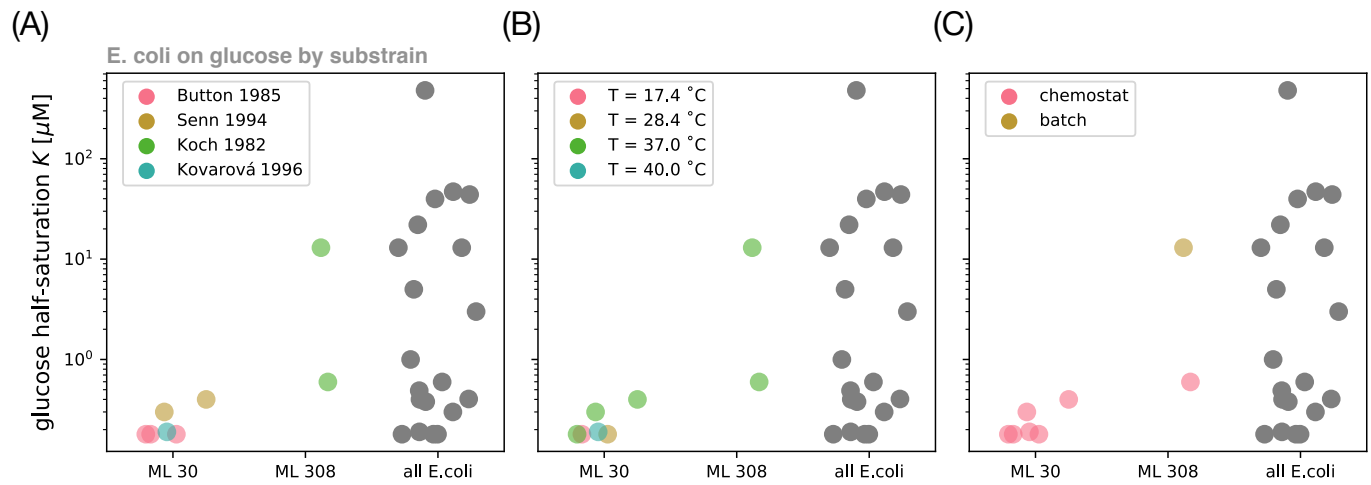

FIG. S5. **Variation in glucose half-saturation concentrations by experiment type and substrain label.** Subset of data from Fig. 2B for *E. coli* on glucose, with different strains separated. The strains ML 30 and ML 308 were derived from a natural isolate in human feces by Jacques Monod in 1946 and differ in their genes for lactose utilization [87]: the *lacI* repressor is non-functional in ML 308. We only show substrains with two or more measurements from the data. The three panels show the same data but are colored according to (A) publication, (B) temperature, and (C) experimental method (batch or chemostat).

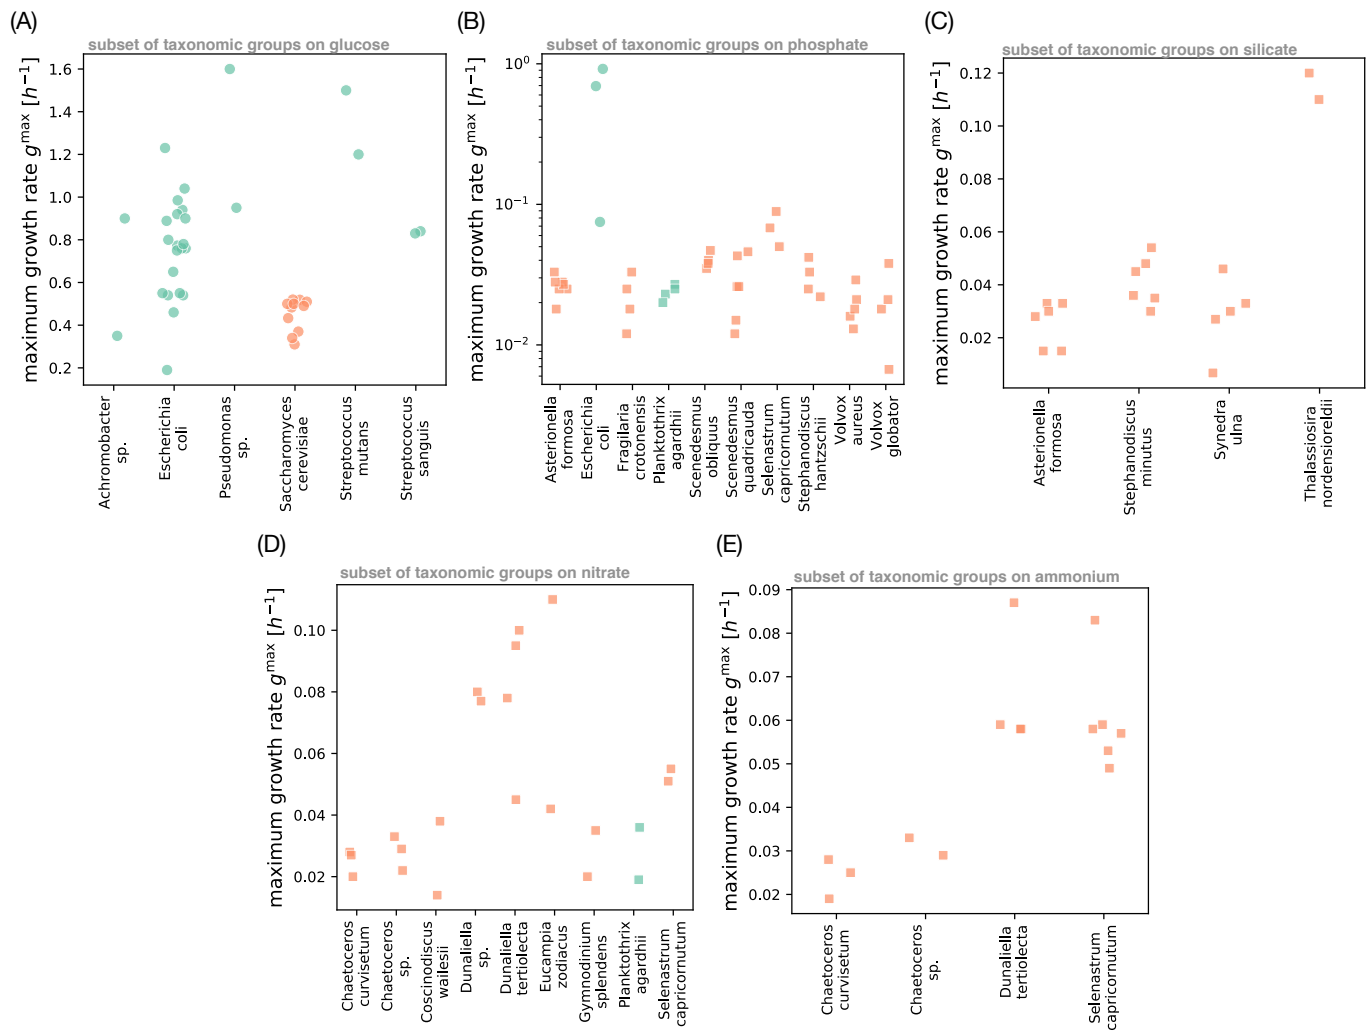

FIG. S6. **Survey of maximum growth rates in our survey grouped by resource and taxon.** (A) Subset of  $g^{\max}$  measurements from Fig. 3A for glucose, grouped by taxon (only those with at least two measurements). Symbols are the same as in Fig. 3A: Color indicates whether the organism is a prokaryote (green) or eukaryote (orange), and shape indicates whether the organism can grow as an autotroph (square) or only as a heterotroph (circle). We use the taxonomic identity given in the original publications, where an ending in *sp.* means the isolate is a representative of the genus but was not identified at the species level. (B) Subset of  $g^{\max}$  measurements from Fig. 3A for phosphate, grouped by taxon (with at least three measurements). Note that we use a logarithmic scale on the y-axis, since this comparison includes both heterotroph isolates (circles) and autotroph isolates (squares) which differ by an order of magnitude in their growth rate. (C) Subset of  $g^{\max}$  measurements from Fig. 3A for silicate, grouped by taxon (with at least two measurements). (D) Subset of  $g^{\max}$  measurements from Fig. 3A for nitrate, grouped by taxon (with at least two measurements). (E) Subset of  $g^{\max}$  measurements from Fig. 3A for ammonium, grouped by taxon (with at least two measurements).

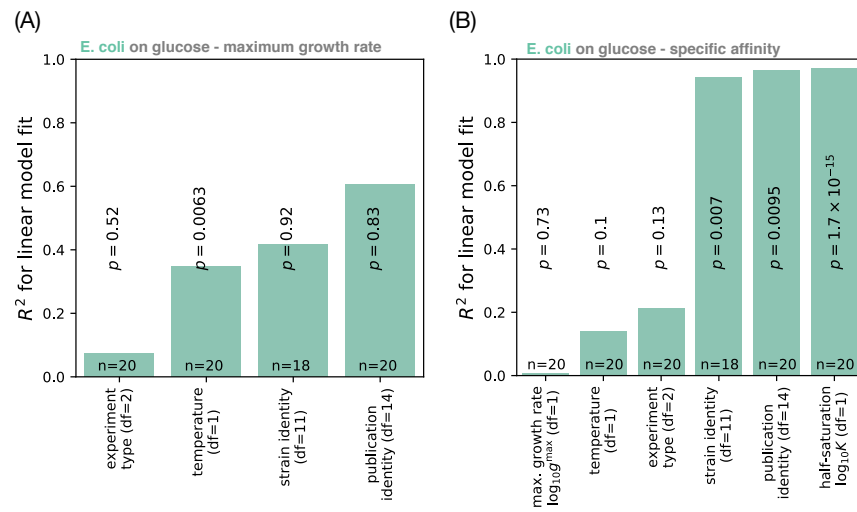

FIG. S7. **Comparison of technical covariates for maximum growth rate and specific affinity.** (A) Linear regression of technical covariates against maximum growth rate on glucose  $g^{\max}$  for all *E. coli* measurements, with degrees of freedom (df), number of data points ( $n$ ), and  $p$ -values indicated. We follow the same analysis as in Fig. S2B, but using  $g^{\max}$  as the target variable for regression (no log transform). (B) Linear regression of technical covariates against the specific affinity  $\log_{10}(g^{\max}/K)$  on glucose for all *E. coli*. The set of underlying isolates is identical to panel A. Here we use the log-transformed maximum growth rate  $\log_{10} g^{\max}$  as a predictor, to compare the contributions of variation in  $\log_{10} g^{\max}$  and variation in  $\log_{10} K$  to the total variation in  $\log_{10}(g^{\max}/K)$ . The fraction of variation  $R^2$  explained by  $\log_{10} g^{\max}$  is too small to be visible.

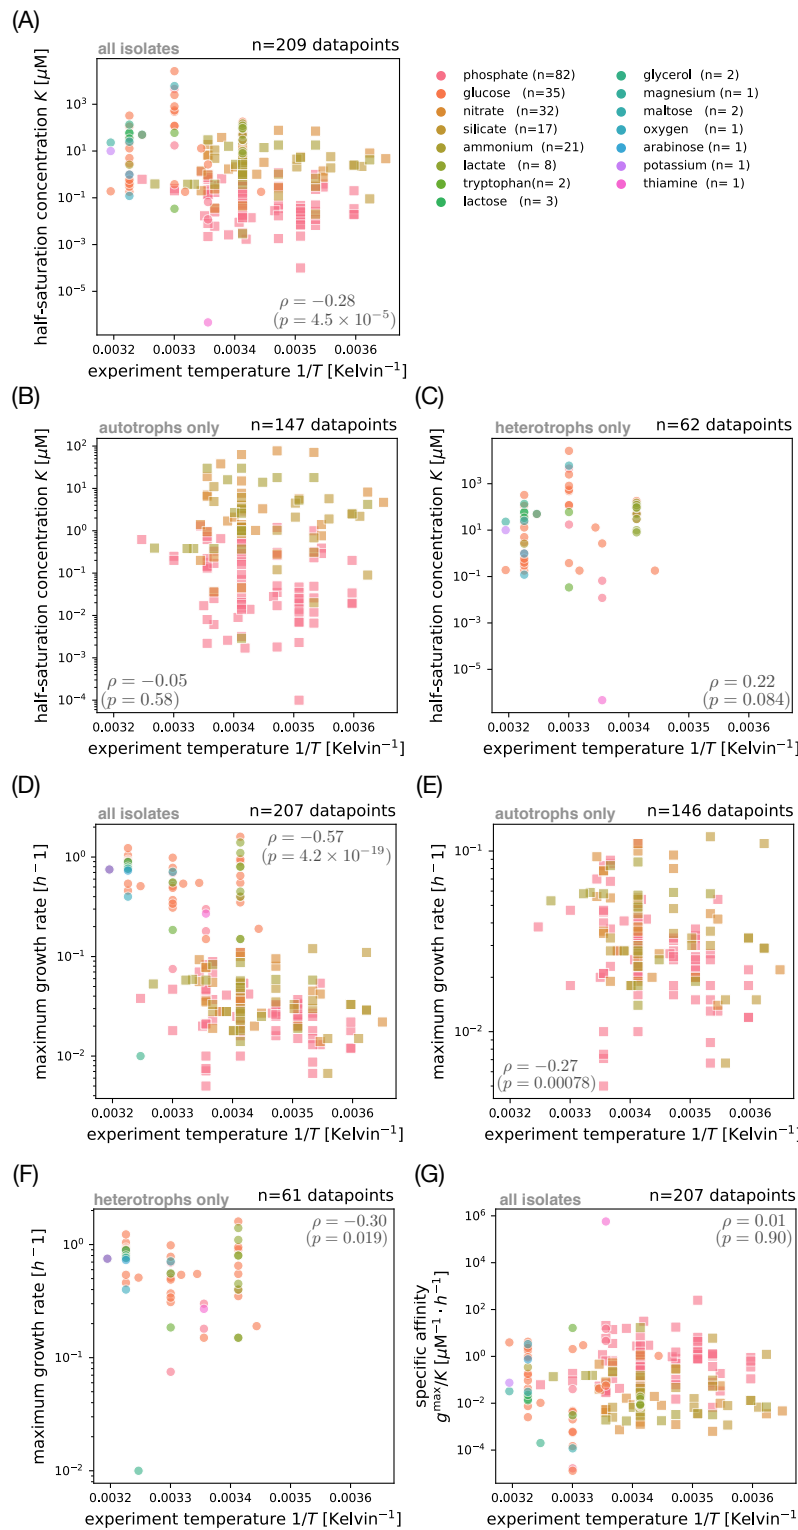

FIG. S8. **Covariation of Monod growth traits with experiment temperature.** (A) Covariation of the half-saturation concentration  $K$  with the experiment temperature reported in the original publication. Some publications in our survey did not report temperature, so this plot has fewer data points than the full dataset (compare Fig. 2A). We compute the Spearman rank correlation  $\rho$  and  $p$ -value across all resources. Colors indicate the limiting resource, with the number of measurements  $n$  in parentheses. Marker shape separates isolates with an autotroph lifestyle (squares) from heterotrophs (circles). (B) Covariation of the half-saturation concentration  $K$  with experiment temperature for all autotrophs (subset of points from panel A). (C) Covariation of the half-saturation concentration  $K$  with experiment temperature for all heterotrophs (subset of points from panel A). (D) Covariation of the maximum growth rate  $g^{\max}$  with experiment temperature. The data shown is less than in panel A, since some publications did not report maximum growth rate. (E) Covariation of the maximum growth rate  $g^{\max}$  with experiment temperature for all autotrophs (subset of points from panel D). (F) Covariation of the maximum growth rate  $g^{\max}$  with experiment temperature for all heterotrophs (subset of points from panel D). (G) Covariation of the specific affinity  $g^{\max}/K$  with experiment temperature. We compute the specific affinity for all isolates with maximum growth rate in panel D.

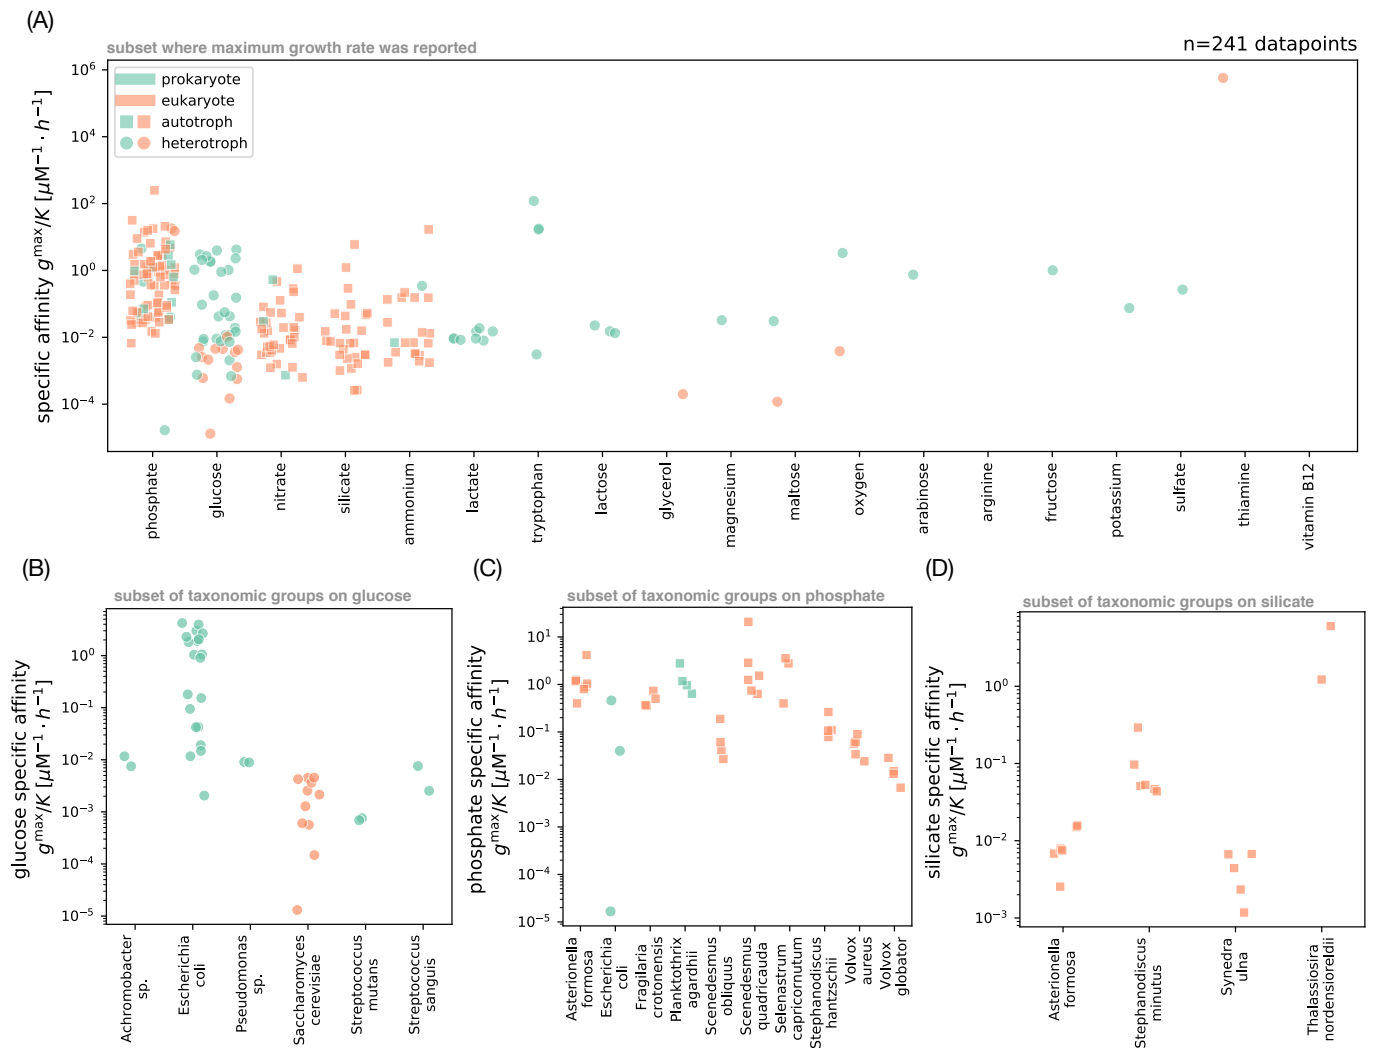

FIG. S9. **Survey of specific affinities.** (A) Variation in specific affinity  $a = g^{\max}/K$  for the microbial isolates in our survey. For each isolate, we compute the trait value from the maximum growth rate  $g^{\max}$  (Fig. 3A) and half-saturation concentration  $K$  (Fig. 2A). Each point represents a different measurement; color indicates whether the organism is a prokaryote (green) or eukaryote (orange), and shape indicates whether the organism can grow as an autotroph (square) or only as a heterotroph (circle). The set of isolates shown here is fewer than in the total dataset, since some publications only reported the half-saturation concentration  $K$  and not the maximum growth rate  $g^{\max}$ . (B) Subset of  $K$  measurements from panel A for glucose, grouped by taxon (only those with at least two measurements). We use the taxonomic identity given in the original publications, where an ending in *sp.* means the isolate is a representative of the genus but was not identified at the species level. Symbols are the same as in panel A. (C) Subset of  $K$  measurements from panel A for phosphate, grouped by taxon (with at least three measurements). (D) Subset for silicate, grouped by taxon (with at least two measurements). Compare also additional plots with  $g^{\max}/K$  measurements for nitrate (Fig. S4C) and ammonium (Fig. S4D).

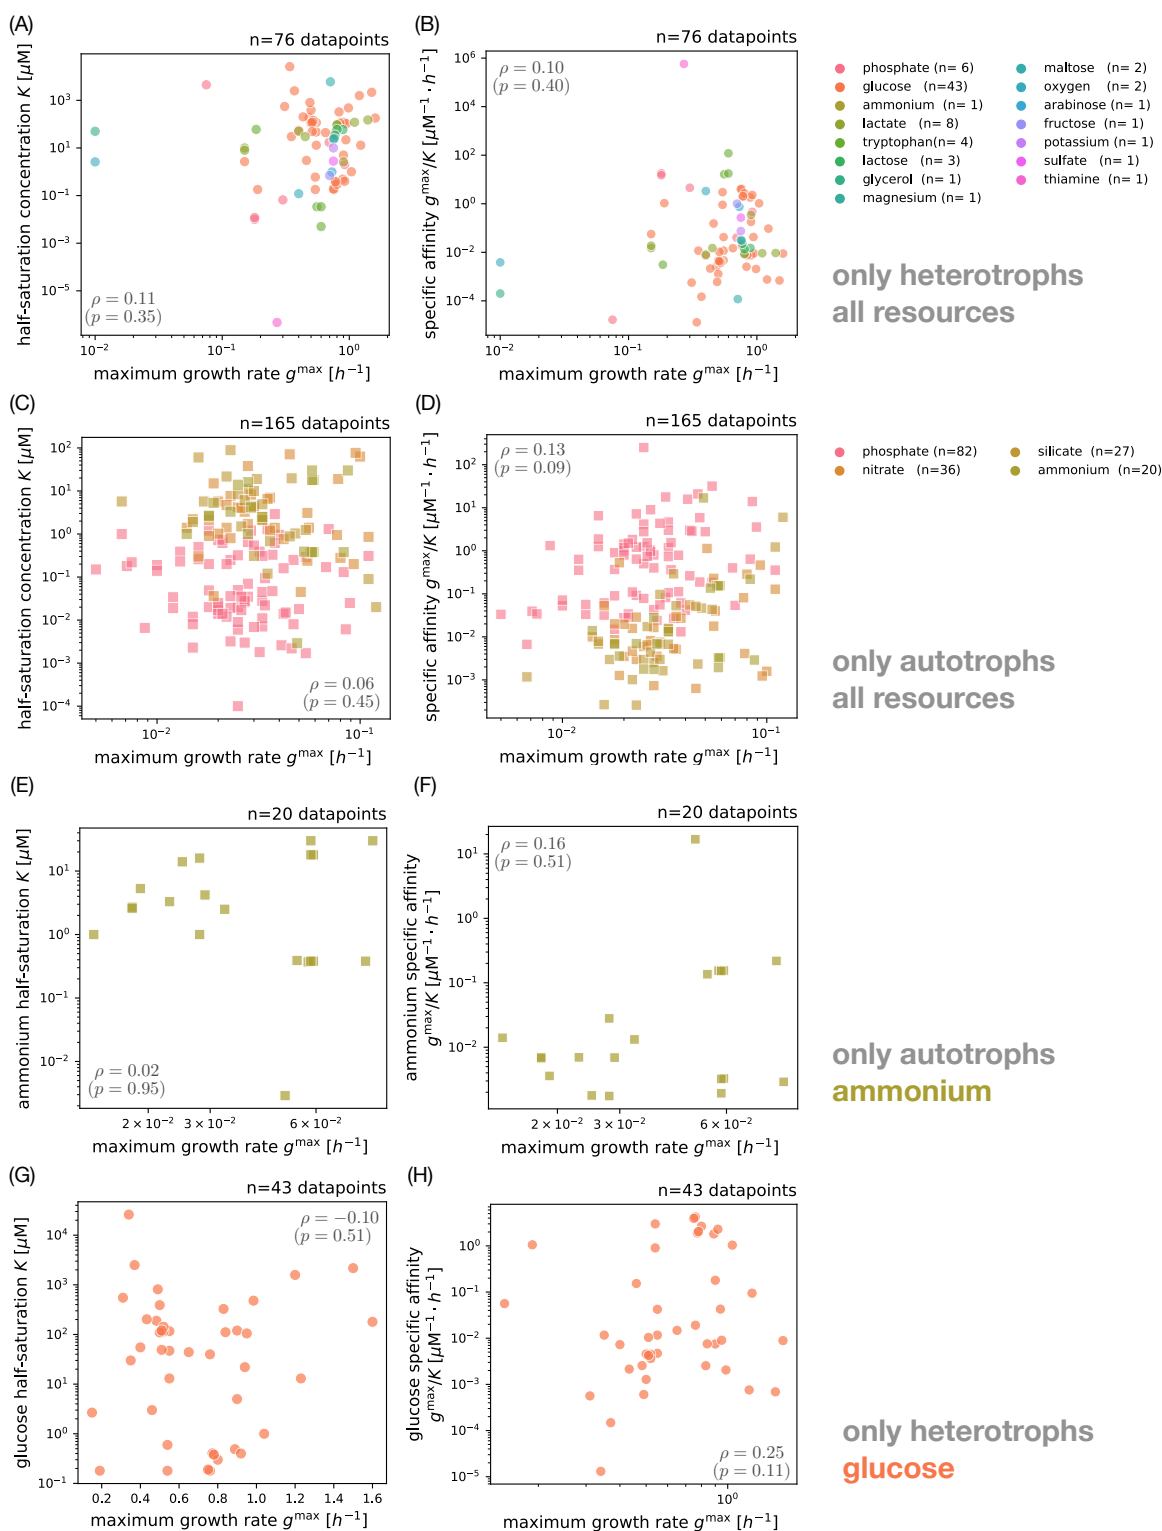

FIG. S10. **Covariation of Monod growth traits for autotroph and heterotroph isolates.** (A) Covariation of half-saturation concentration  $K$  with maximum growth rate  $g^{\max}$  for all heterotrophs (subset of points from Fig. 3B). We compute the Spearman rank correlation  $\rho$  and  $p$ -value across all resources. Colors indicate the limiting resource, with the number of measurements  $n$  in parentheses. (B) Covariation of specific affinity  $g^{\max}/K$  with  $g^{\max}$  for all heterotrophs (subset from Fig. S11A). (C) Covariation of half-saturation concentration with maximum growth rate for all autotrophs (subset from Fig. 3B). (D) Covariation of specific affinity with maximum growth rate for all autotrophs (subset from Fig. S11A). (E) Covariation of half-saturation concentration with maximum growth rate for ammonium only (subset from panel C). See Fig. 3C–E for phosphate, nitrate, and silicate. (F) Covariation of specific affinity with maximum growth rate for ammonium only (subset from panel D). See Fig. S11B–D for phosphate, nitrate, and silicate. (G) Covariation of half-saturation concentration with maximum growth rate for glucose only (subset from panel A). See Fig. 3F for covariation within species. (H) Covariation of specific affinity with maximum growth rate for glucose only (subset from panel B). See Fig. S11D for covariation within species.



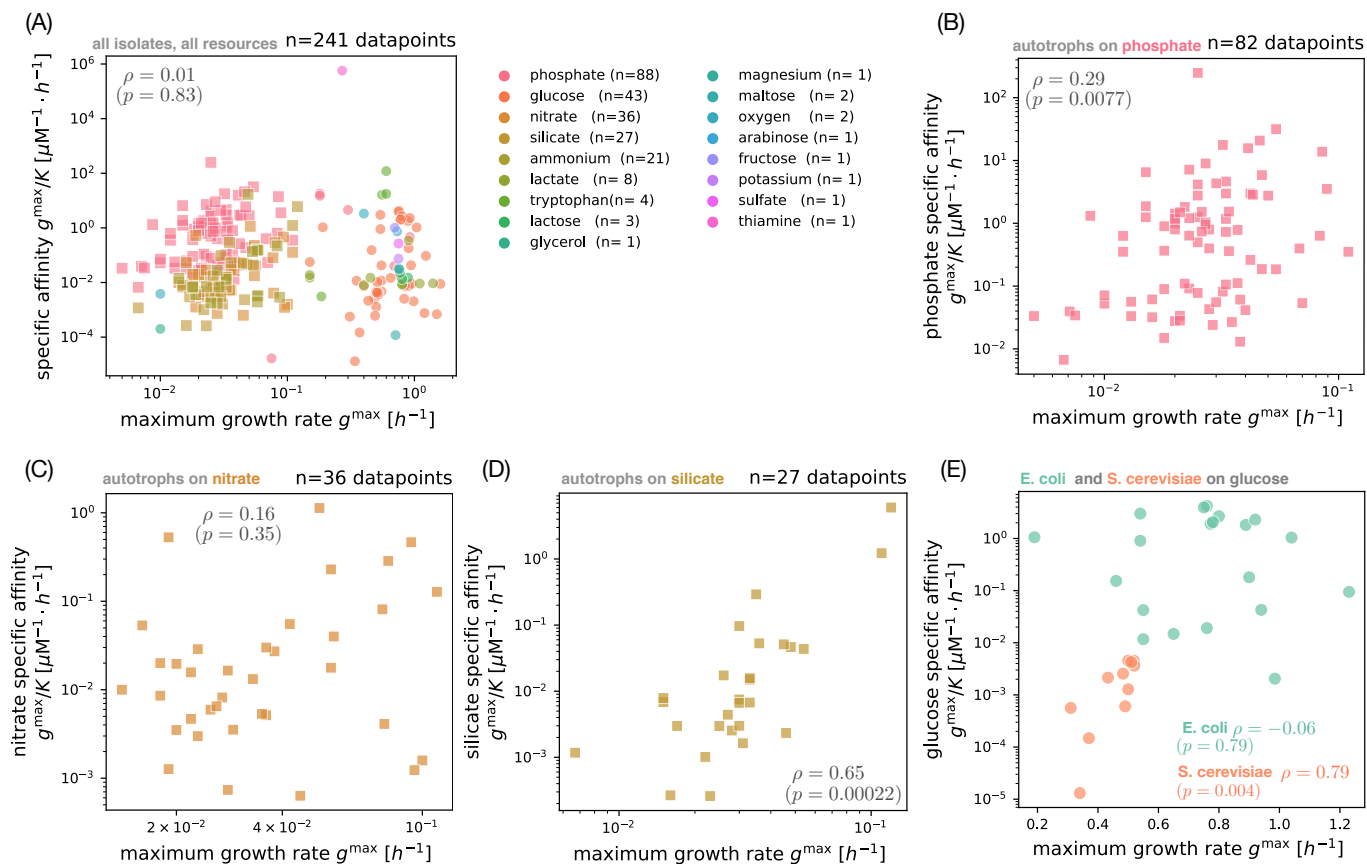

FIG. S11. **Covariation between maximum growth rate and specific affinity by resource.** (A) Covariation of maximum growth rate  $g^{\max}$  and specific affinity  $g^{\max}/K$  across all resources and isolates (from Fig. S9A). Marker shapes distinguish autotrophs (squares) from heterotrophs (circles); colors indicates the limiting resource, with the number of measurements  $n$  given in parentheses. We compute the Spearman rank correlation  $\rho$  and  $p$ -value across the pooled set of isolates. (B) Subset of measurements from panel A for phosphate (only autotroph isolates shown). (C) Subset of measurements from panel A for nitrate. (D) Subset of measurements from panel A for silicate. (E) Covariation between maximum growth rate  $g^{\max}$  and glucose specific affinity  $g^{\max}/K$  for measurements of *E. coli* (green) and *S. cerevisiae* (orange), with Spearman rank correlations  $\rho$  and  $p$ -values by species.

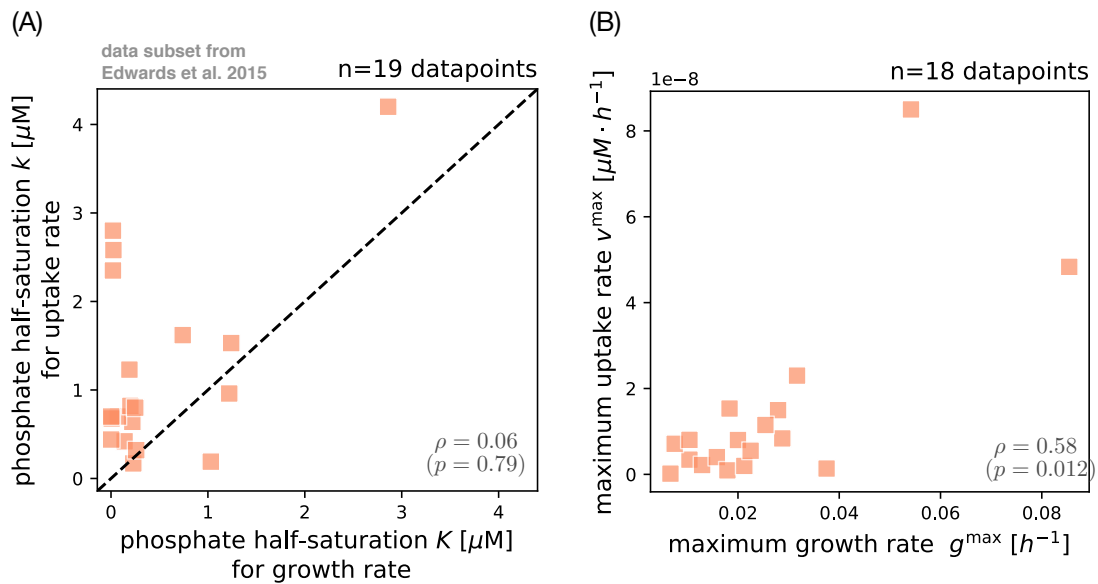

FIG. S12. **Covariation between uptake and growth rate parameters for phosphate based on the phytoplankton trait database by Edwards et al. [44].** (A) Covariation between the half-saturation concentration  $k$  for uptake rate and the half-saturation concentration  $K$  for growth rate (Eq. (1)). The dashed diagonal line indicates perfect agreement ( $x = y$ ), and we calculate the Spearman rank correlation  $\rho$  with  $p$ -value. We show all data points from Edwards et al. [44] which included half-saturation concentrations for uptake and growth rate. These data points are for phosphate as the limiting resource. (B) Covariation between maximum uptake rate  $v^{\max}$  in the Michaelis-Menten model and the maximum growth rate  $g^{\max}$  in the Monod model, with Spearman rank correlation  $\rho$  and  $p$ -value. The data shown here corresponds to the same measurements as in panel A but with one fewer data point, since one isolate lacked the measurement for maximum growth rate. Color and marker shape are equivalent to Fig. 2A and indicate that the subset of data shown here includes only eukaryotic organisms (orange fill) capable of autotrophy (square shape).

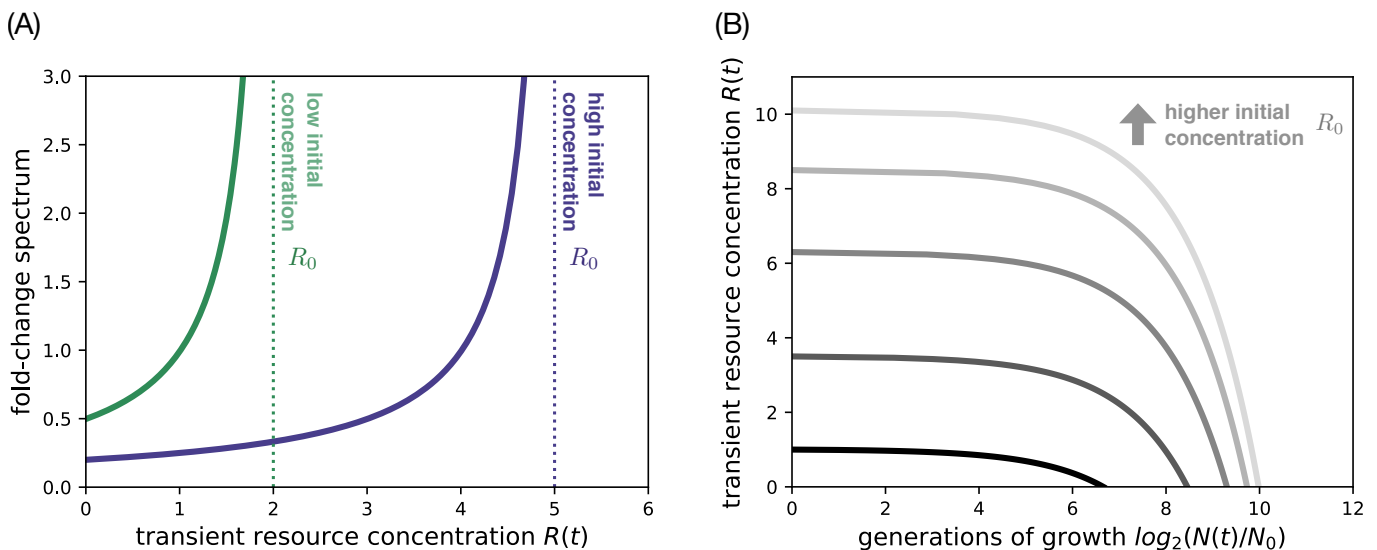

FIG. S13. **Selection within a batch growth cycle.** (A) The fold-change spectrum (thick lines) throughout the growth cycle for high and low initial concentration  $R_0$  (dotted lines). Curves are computed from the weight term in Eq. (S42) with effective biomass yield  $\bar{Y} = 1$  and  $N_0 = 0.01$ . (B) The transient resource concentration, starting from different initial concentrations, versus generations of biomass growth (gray lines). The lowest line ( $R_0 = 1$ ) corresponds to the resource trajectory for the selection scenario used for the phase diagram in Fig. S15. The transient resources are converted into generations using the equations for resource consumption, assuming an identical biomass yield  $Y = 1$  for both strains and initial biomass  $N_0 = 0.01$ .

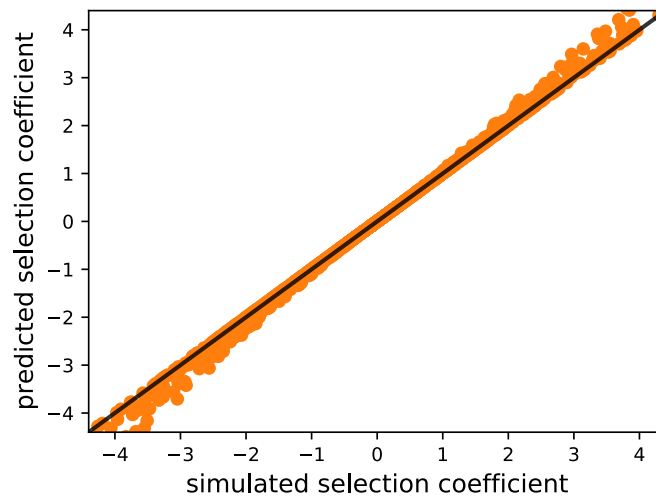

FIG. S14. **Test of the selection coefficient approximation.** The predicted selection coefficient across a sample of wild-type and mutant strains, compared to the selection coefficient (Supplementary Information Sec. S6) from simulation of the differential equations (Supplementary Information Secs. S3 and S4). The black diagonal line indicates perfect agreement between simulation and prediction. We draw the wild-type traits over four orders of magnitude and sample relative mutant effects on maximum growth rate, half-saturation concentration, and biomass yield from a cubic region in trait space:  $[-0.5, 0.5]^3$ . Each strain pair is systematically evaluated at different initial frequencies  $x = 0.01, 0.5, 0.99$  using the general Eq. (S47) and contributes three data points. Without loss of generality, we fix the initial biomass to  $N_0 = 0.01$  and initial resource concentration to  $R_0 = 1$ . The trait values for the half-saturation concentration  $K$  span two orders of magnitude around this concentration such that we cover both limiting scenarios with dominant selection on maximum growth rate ( $R_0 \gg K$ ) and half-saturation concentration ( $R_0 \ll K$ ).

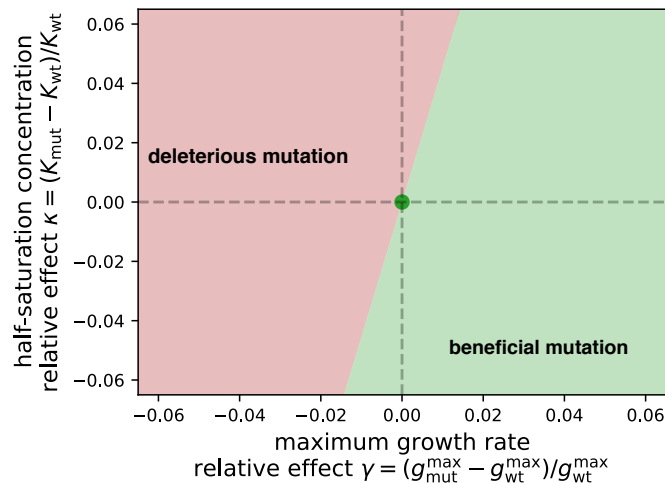

FIG. S15. **Diagram of selection across mutation effects under batch growth.** The space of mutation effects on maximum growth rate  $\gamma = (g_{mut}^{max} - g_{wt}^{max})/g_{wt}^{max}$  and half-saturation concentration  $\kappa = (K_{mut} - K_{wt})/K_{wt}$  relative to a wild-type strain (central dot), with green marking the space of mutations that are overall beneficial ( $s > 0$ ) and red marking mutations that are overall deleterious ( $s < 0$ ) according to Eq. (S47).

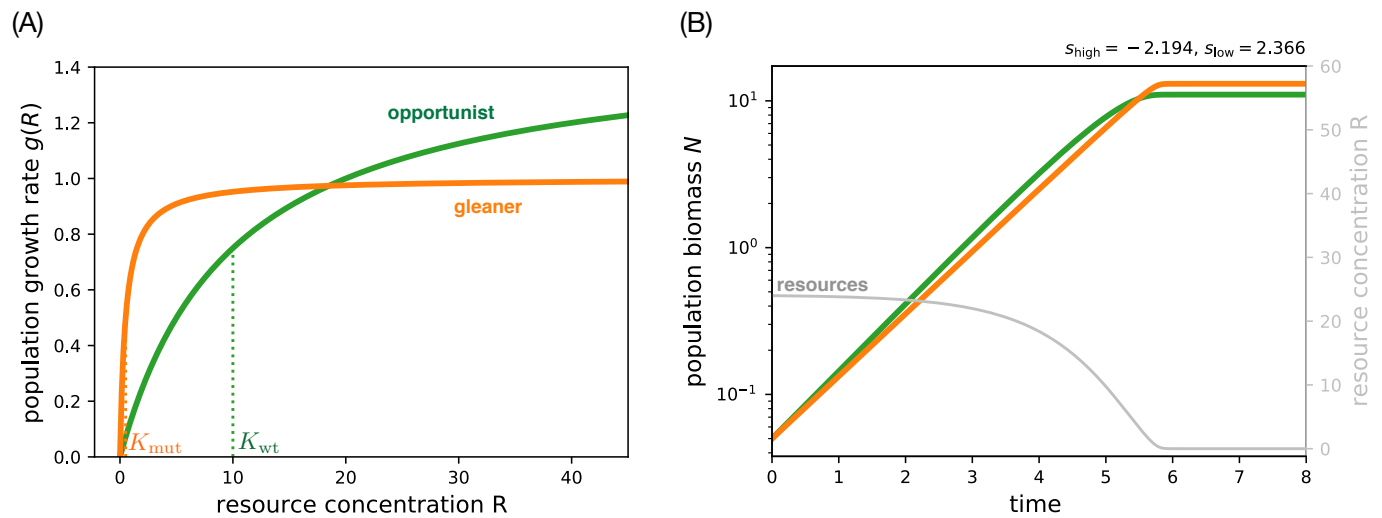

FIG. S16. **The gleaner and opportunist strategies in the Monod growth model.** (A) The growth rate  $g(R)$  as a function of the external resource concentration  $R$  for two strains with a tradeoff. The opportunist strain (green) has a higher maximum growth rate  $g^{\text{max}} = 1.5$  compared to the gleaner strain (orange) with  $g^{\text{max}} = 1$ . But the gleaner has the growth rate advantage at low concentrations due to a smaller half-saturation concentration  $K = 0.5$  (orange dotted line) relative to the opportunist with  $K = 10$  (green dotted line). (B) A single growth cycle for the gleaner and opportunist strain pair from panel A in competition. We simulate the population dynamics according to Eq. (S11), starting from an initial mutant frequency  $x = 0.5$  and total initial biomass  $N_0 = 0.01$ . On a separate axis, the transient resource concentration  $R$  (gray line, initial value  $R_0 = 24$ ) and in the panel title, the components of selection as computed from Eq. (S47).

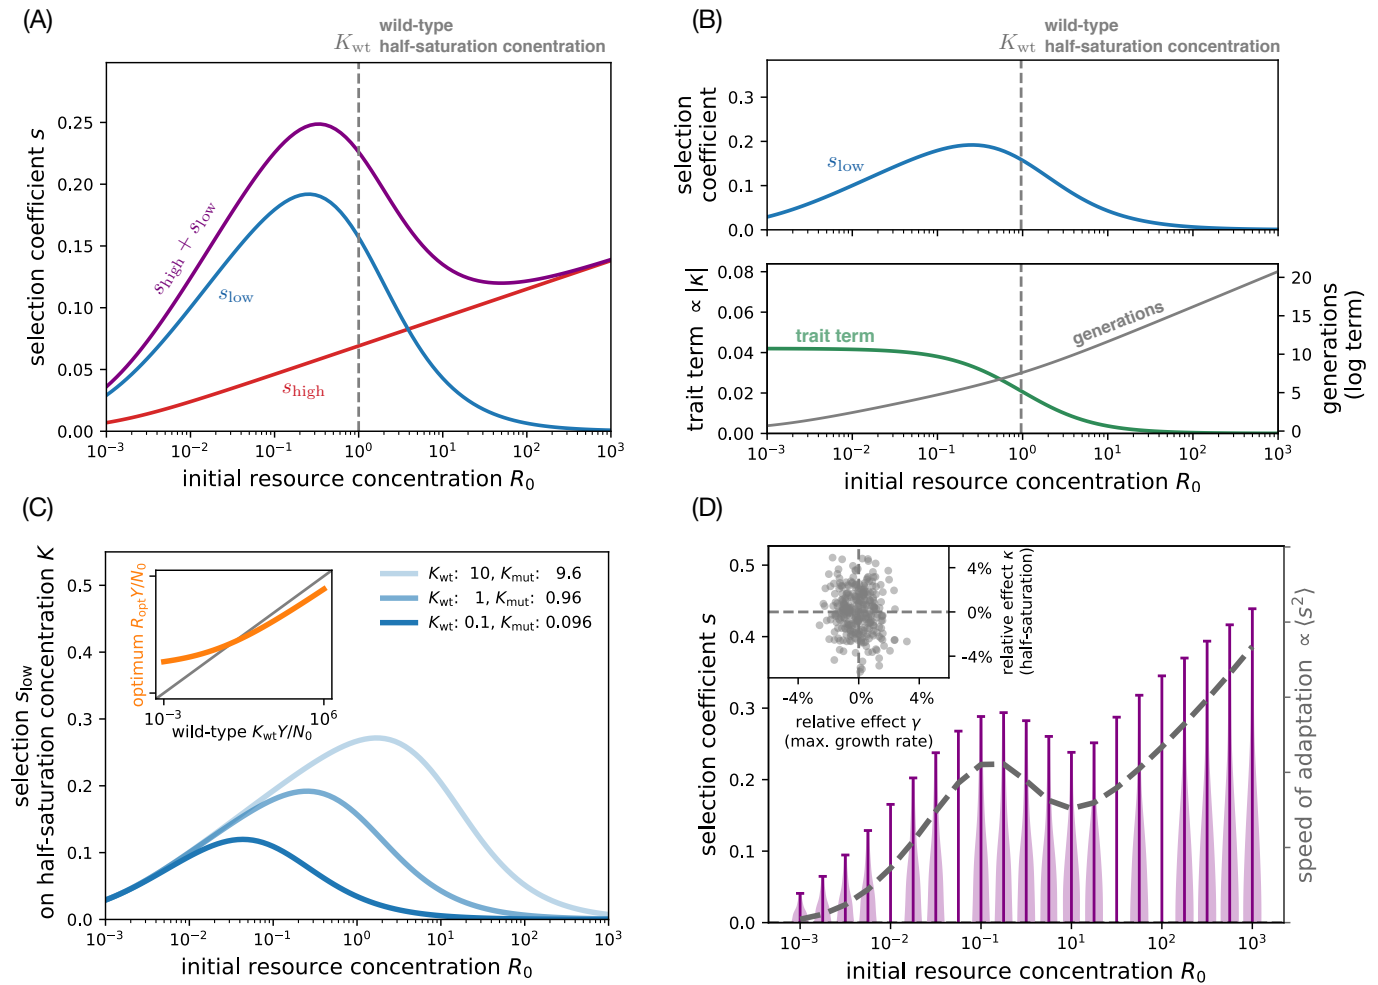

FIG. S17. **Selection dependence on resource concentration under fixed-bottleneck batch dynamics.** (A) Dependence on external resource concentration  $R_0$  of the total selection coefficient (purple) and its two components at high ( $s_{\text{high}}$ , red) and low ( $s_{\text{low}}$ , blue) resource concentrations under a fixed bottleneck (Eq. (S47)). (B) Selection  $s_{\text{low}}$  on growth at low resource concentrations (top panel) decomposed into two constituent factors (bottom panel) at fixed bottleneck biomass ( $N_0 = 10^{-3}$ ). The top panel is the same as panel A for the approximate selection coefficient  $s_{\text{low}}$ ; in the bottom panel, the two factors that constitute  $s_{\text{low}}$  are the trait factor from Eq. (S60) in green and the log term from Eq. (S61) in gray. The log term is related but not identical to the number of generations in the growth cycle. Panels A and B are based on an example mutation with relative effects  $\gamma = 0.01$  on maximum growth rate and  $\kappa = -0.04$  on half-saturation concentration over the wild-type traits  $g_{\text{wt}} = 1$  and  $K_{\text{wt}} = 1$ . (C) Selection on the half-saturation concentration  $K$  as a function of resource concentration  $R_0$  for three different values of  $K$  (different shades of blue). The inset shows a numerical calculation (orange points) of the optimal resource concentration  $R_{\text{opt}}$  that maximizes selection on  $K$  as a function of the wild-type half-saturation  $K_{\text{wt}}$ ; the gray line is the identity. Parameters are the same as in panels A and B, but we include two alternative wild-type half-saturation concentrations  $K_{\text{wt}} = 10$  (lightest blue) and  $K_{\text{wt}} = 0.1$  (darkest blue). (D) The distribution of beneficial selection coefficients (purple) as a function of initial resource concentration  $R_0$ , with the variance (which is proportional to the speed of adaptation) shown as the dashed gray line and plotted against the right axis. The inset shows the underlying sample of mutations according to their relative effects on maximum growth rate  $\gamma$  and half-saturation concentration  $\kappa$ . We sample the effects of mutations from independent Gaussian distributions for  $\gamma$  (mean  $\mu = 0$ , s.d.  $\sigma = 0.01$ ) and  $\kappa$  (mean  $\mu = 0$ , s.d.  $\sigma = 0.02$ ). All panels assume initial population biomass  $N_0 = 0.001$ , initial mutant frequency  $x = 0.01$ , and equal yields for mutant and wild-type.

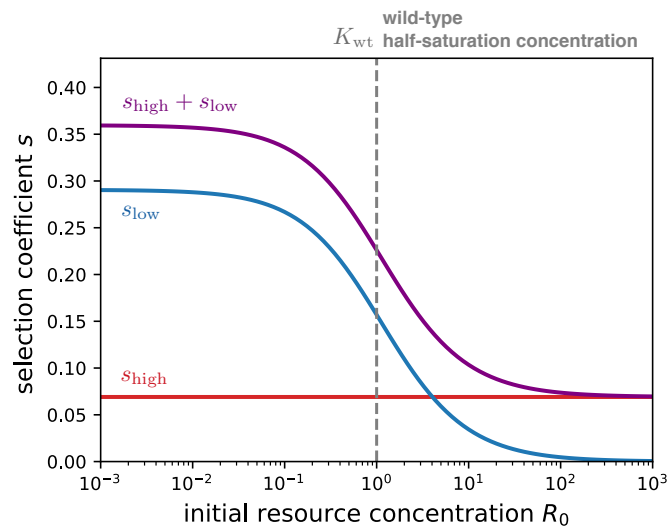

FIG. S18. Selection dependence on resource concentration under fixed-dilution batch dynamics. Same as Fig. S17A, but for fixed-dilution batch dynamics with  $D = 1000$ .

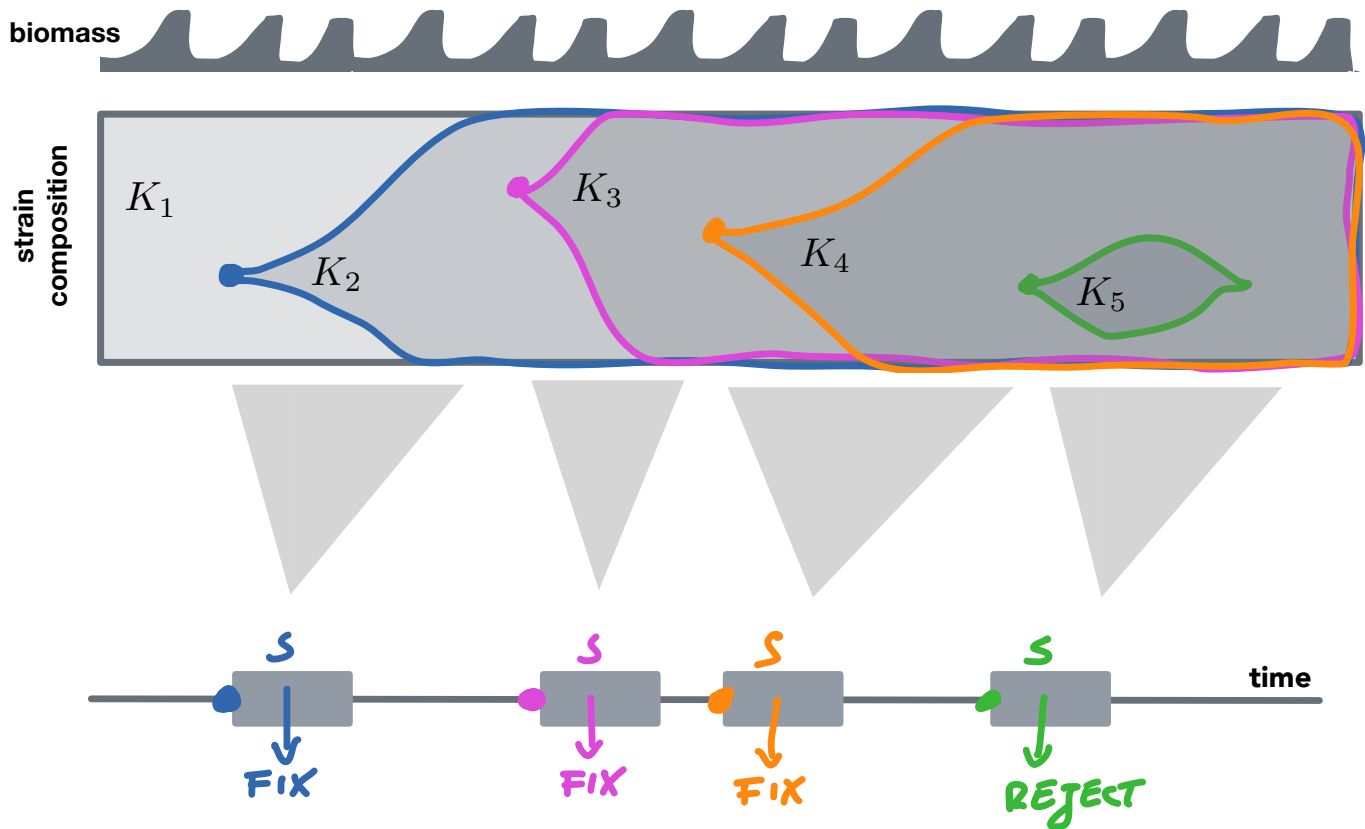

FIG. S19. Schematic of evolutionary dynamics in the strong-selection weak-mutation (SSWM) regime. The top panel shows a schematic of the population biomass undergoing cycles of batch dynamics with serial transfers. The middle panel shows the genetic composition of the population. The population begins with a half-saturation concentration  $K_1$ . Then a mutation arises with a different half-saturation  $K_2$  (blue), which increases in frequency until it fixes. Then another mutation with a half-saturation value  $K_3$  arises (magenta), and the process continues. The bottom panel shows a simplified algorithm for this process that we use in our simulations (Supplementary Information Sec. S11), where mutations are determined to fix or go extinct one at a time based on their selection coefficients, without explicitly simulating their intermediate frequency dynamics.

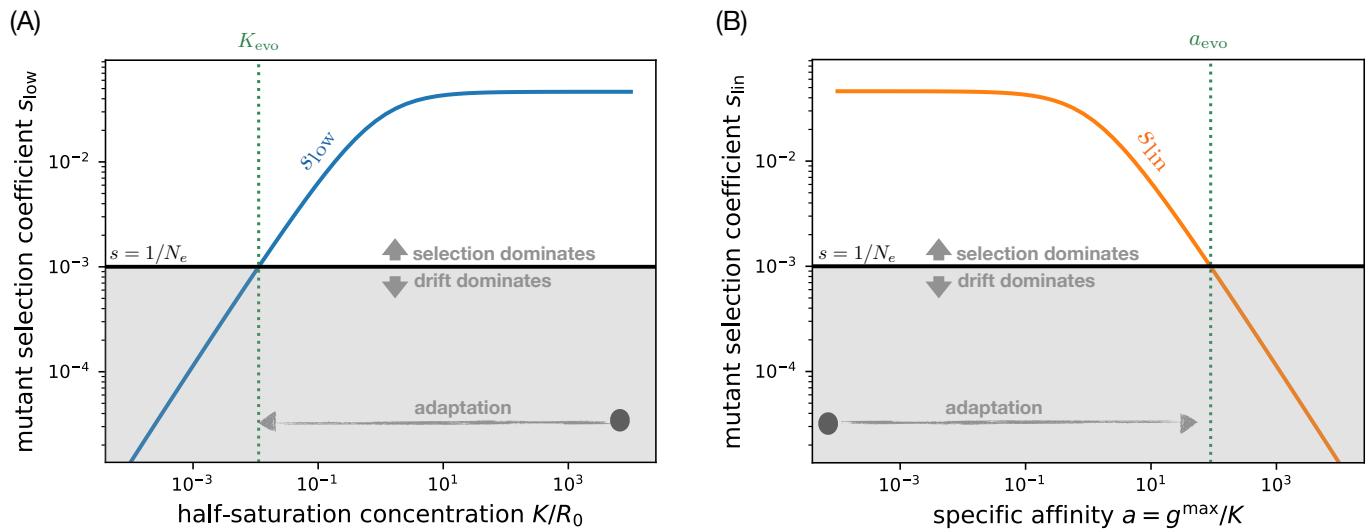

FIG. S20. **Selection-drift balance under batch dynamics.** (A) Selection  $s_{low}$  on the half-saturation concentration  $K$  as a function of the current wild-type trait value in the population (blue line, Eq. (S47)), with mutation effect  $\kappa_{max} = -10^{-2}$ . The horizontal black line marks the strength of genetic drift; its intersection with the selection coefficient defines the value of  $K_{evo}$  at which selection-drift balance occurs (vertical dotted line; Eq. (3)). Above this point, selection is stronger than genetic drift, and so the half-saturation concentration will adapt downward until it reaches that point. (B) Selection on the specific affinity  $a = g^{max}/K$  as a function of the current wild-type trait value in the population (orange line, Eq. (S52c)) assuming a relative mutation effect  $\alpha = 10^{-2}$  that acts directly on the specific affinity instead of on the half-saturation concentration. For the specific affinity, adaptation means the trait value increases. Similar to panel A, the intersection of the selection coefficient with the black line (strength of genetic drift) defines the evolved trait value  $a_{evo}$  at selection-drift balance. Parameters are identical in both panels with  $R_0 = 1$ ,  $N_0 = 0.01$ ,  $N_e = 10^3$ , and  $x = 0.001$ . We set mutant and wild-type to equal maximum growth rates and equal yields. This plot is based on fixed bottleneck biomass  $N_0$ , but we observe similar dependences for fixed dilution factor  $D$ . In that case, we rewrite Eq. (S47) (resp. Eq. (S52c)) in terms of  $D$  (replacing  $N_0$  using Eq. (S21)) and see that the selection coefficient depends on the wild-type trait  $K$  with the same functional form.

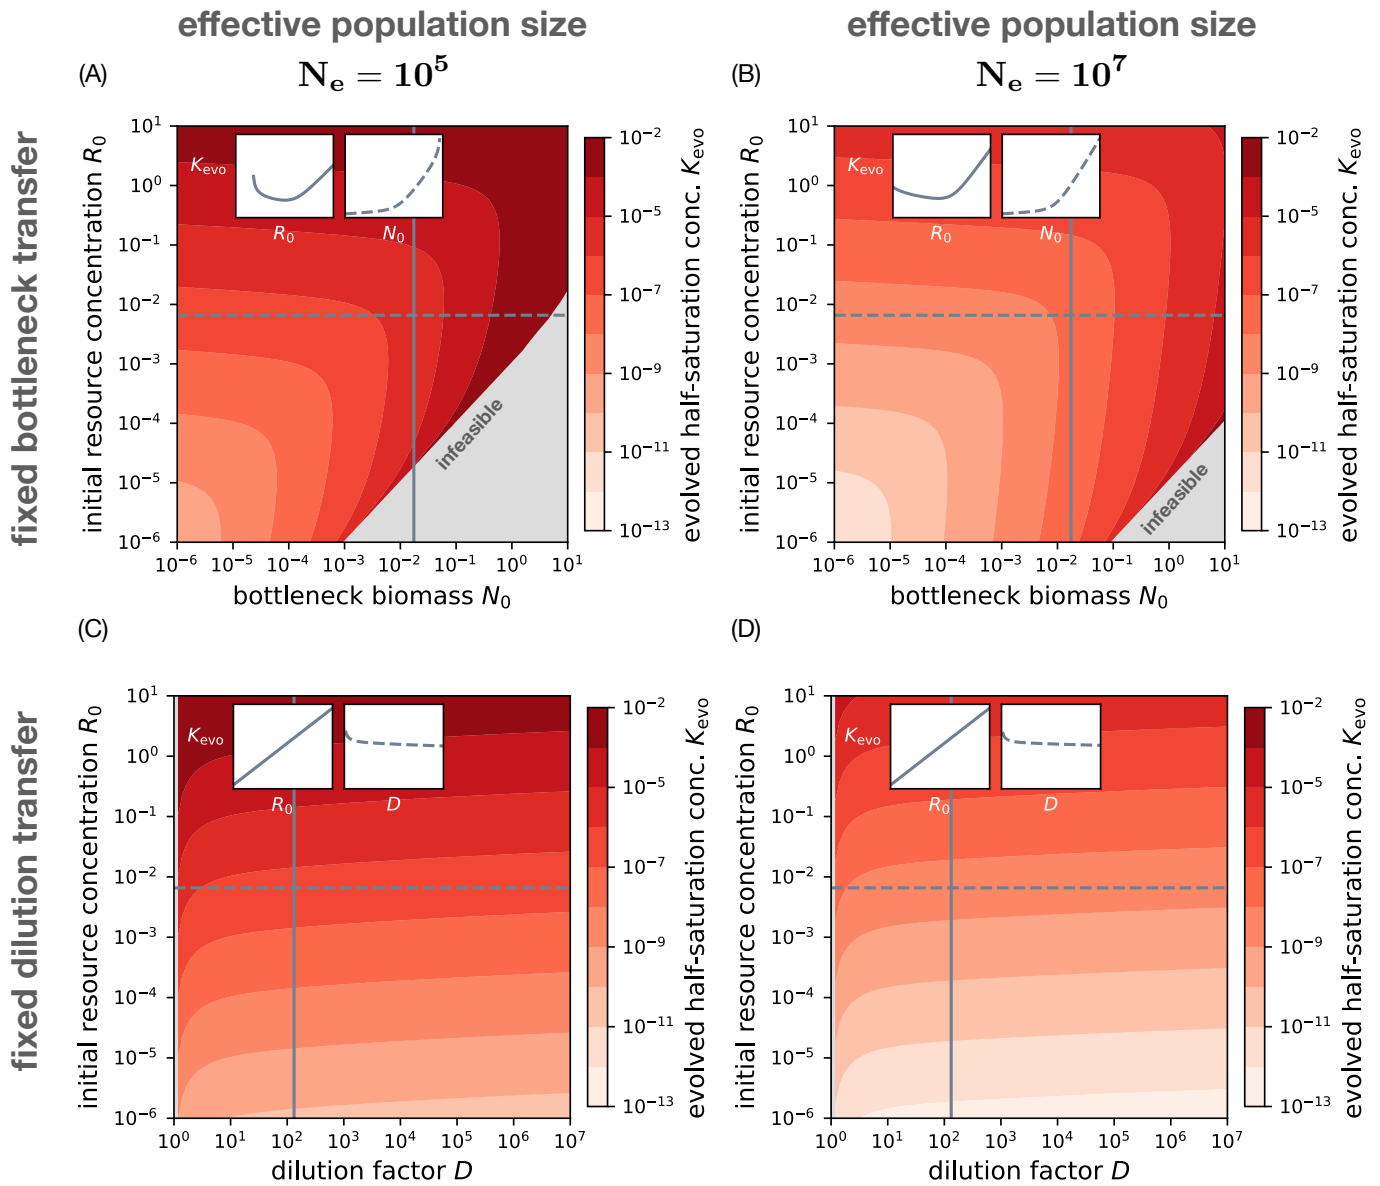

FIG. S21. **The evolved half-saturation concentration as a function of experimental parameters with independent genetic drift.** (A) We numerically solve for the evolved half-saturation concentration  $K_{evo}$  under selection-drift balance (using Eqs. (2) and (3)) as a function of the fixed-bottleneck biomass  $N_0$  and initial resource concentration  $R_0$ , where the effective population size  $N_e = 10^5$  is an independent parameter. Where the selection-drift balance condition is infeasible (gray area), the half-saturation concentration evolves neutrally without steady state. The insets show cross-sections along initial resource concentration  $R_0$  (solid line) and bottleneck biomass  $N_0$  (dashed line). (B) Same as panel A, but for a larger effective population size  $N_e = 10^7$ . (C) Same as panel A but for fixed-dilution batch dynamics, with varying  $D$  instead of  $N_0$ . (D) Same as panel C, but for a larger effective population size  $N_e = 10^7$ . All panels use identical growth rates  $g^{max} = 1$  and biomass yields  $Y = 1$  for wild-type and mutant strain with a fixed mutation effect  $\kappa = 0.01$  on the half-saturation concentration. The initial mutant frequency  $x = 1/N_e$  is adjusted to the effective population size  $N_e$ .



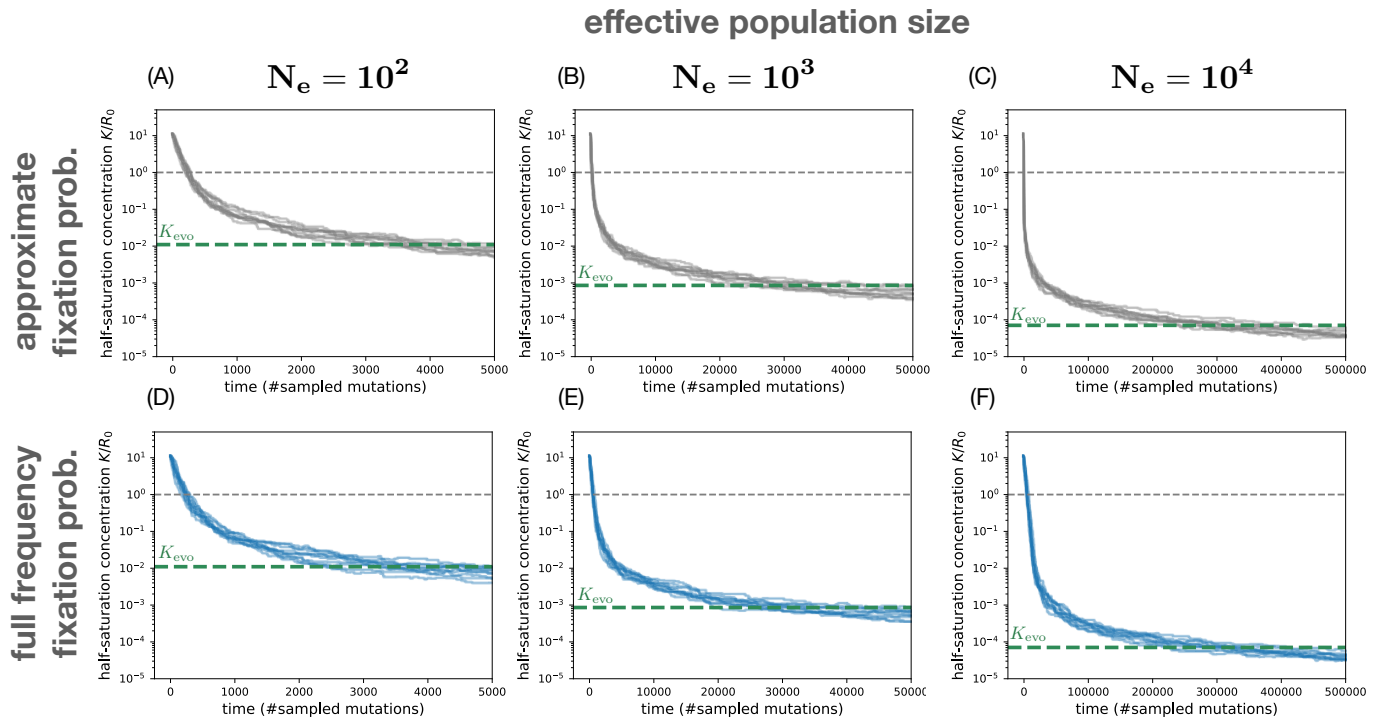

FIG. S22. **Simulated evolutionary trajectories of the half-saturation concentration under batch dynamics.** We simulate the time-course of evolution in the half-saturation concentration under the SSWM regime (Supplementary Information Sec. S11) for different strengths of genetic drift ( $1/N_e$ ). Each line corresponds to a separate run of the stochastic evolution process. Here mutations are sampled with random effect  $\kappa = (K_{\text{mut}} - K_{\text{wt}})/K_{\text{wt}}$  from a uniform distribution in  $[-0.1, 0.1]$  and accepted or rejected according to their probability of fixation (Supplementary Information Sec. S11). (A)–(C) In the top row, we use the approximate fixation probability Eq. (S63) which depends only on the selection coefficient at the initial mutant frequency  $x = 1/N_e$ . (D)–(F) In the bottom row, we use the integrated form of the fixation probability from Eq. (S62) that takes into account the frequency-dependence of the mutant selection coefficient (Eq. (S47)). For each panel, we numerically calculate the half-saturation concentration  $K_{\text{evo}}$  at selection-drift balance (dashed line) using Eqs. (2) and (3). To guide the eye, we also mark the half-saturation concentration  $K = R_0$  that matches the environmental concentration (gray line). All panels are based on identical maximum growth rates  $g^{\text{max}} = 1$  and biomass yields  $Y = 1$  for the mutant and wild-type strain such that only the half-saturation concentration evolves. The length of the growth cycle is constant with  $\approx 6.6$  generations at initial resource concentration  $R_0 = 1$  and fixed-bottleneck biomass  $N_0 = 0.01$ .

### effective population size

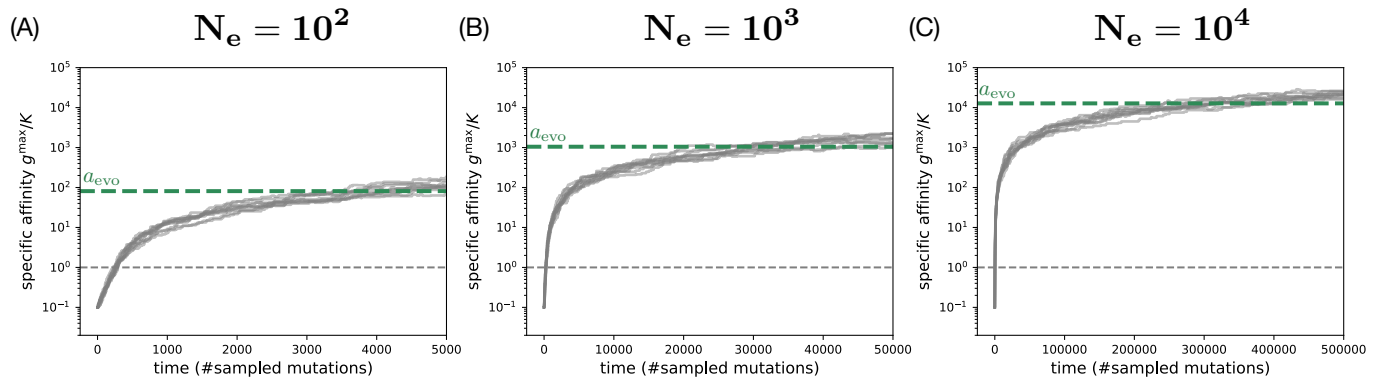

FIG. S23. **Simulated evolutionary trajectories for the specific affinity under batch dynamics.** We simulate the time-course of evolution in the SSWM regime (Supplementary Information Sec. S11) similar to Fig. S22 but assuming that mutations directly affect the specific affinity  $a = g^{\max}/K$  instead of the half-saturation  $K$  alone. Here mutations are sampled with random effect  $\alpha = (a_{\text{mut}} - a_{\text{wt}})/a_{\text{wt}}$  from a uniform distribution in  $[-0.1, 0.1]$  and accepted or rejected according to their probability of fixation (compare also Sec. S14). Here we use the approximate fixation probability Eq. (S63) which depends on the selection coefficient at the initial mutant frequency  $x = 1/N_e$ . The panels (A)–(C) only differ in the effective population size  $N_e$  used for the simulation. For each panel, we numerically calculate the specific affinity  $a_{\text{evo}}$  at selection-drift balance (dashed line) using Eqs. (S52c) and (3). All panels are based on identical maximum growth rates  $g^{\max} = 1$  and biomass yields  $Y = 1$  for the mutant and wild-type strain such that only the specific affinity evolves. The length of the growth cycle is constant with  $\approx 6.6$  generations at initial resource concentration  $R_0 = 1$  and fixed-bottleneck biomass  $N_0 = 0.01$ .

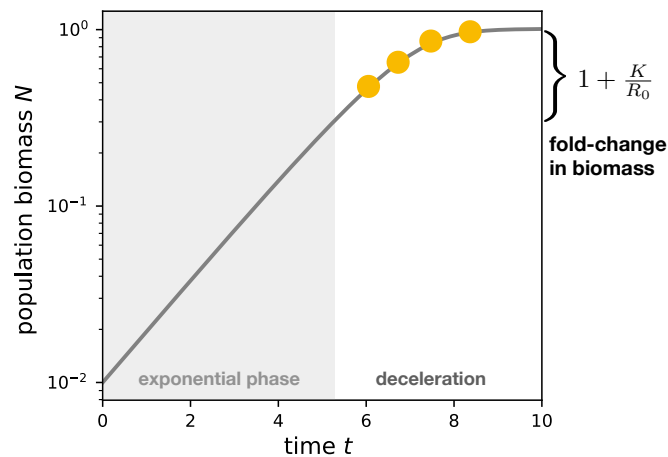

FIG. S24. **Detecting the half-saturation concentration  $K$  from time-series data.** We use an initial resource concentration  $R_0 = 10$  close to the half-saturation concentration of the wild-type strain ( $K_{\text{wt}} = 5$ ; see Fig. 1) to simulate a monoculture growth curve from Eq. (S11) (Supplementary Information Sec. S3). The population leaves steady exponential growth phase (gray area) to enter the deceleration phase (white area). To fit the half-saturation concentration  $K$ , the time-series must include multiple data points in the deceleration phase (orange dots; Supplementary Information Sec. S15). On the right axis, a bracket marks the fold-change from the onset of deceleration at biomass to the saturation.

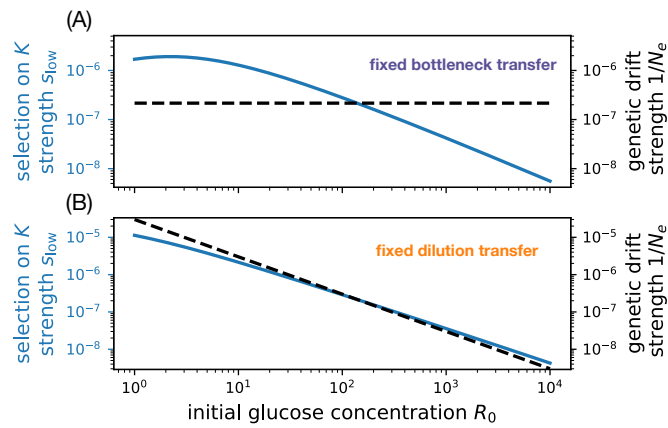

FIG. S25. **Environmental dependence of selection and genetic drift under batch dynamics.** The top panel shows selection  $s_{\text{low}}$  on the half-saturation concentration  $K$  (blue solid line, left axis) and the strength of genetic drift  $1/N_e$  (dashed black line, right axis) as functions of the resource concentration  $R_0$  under fixed-bottleneck batch dynamics. In this case, the effective population size is independent of the resource concentration. We use parameters based on the LTEE (same as in Fig. 5C):  $N_0 = 4.6 \times 10^5$  cells/mL and  $N_e = VN_0$  using culture volume  $V = 10$  mL,  $g^{\text{max}} = 0.888/\text{h}$ , and  $Y = 3.3 \times 10^8$  cells/ $\mu\text{mol}$  [23]. The bottom panel shows the same but for fixed-dilution batch dynamics, with  $D = 100$ ; in this case the effective population size is proportional to the resource concentration, and thus the strength of genetic drift decreases with  $R_0$ .

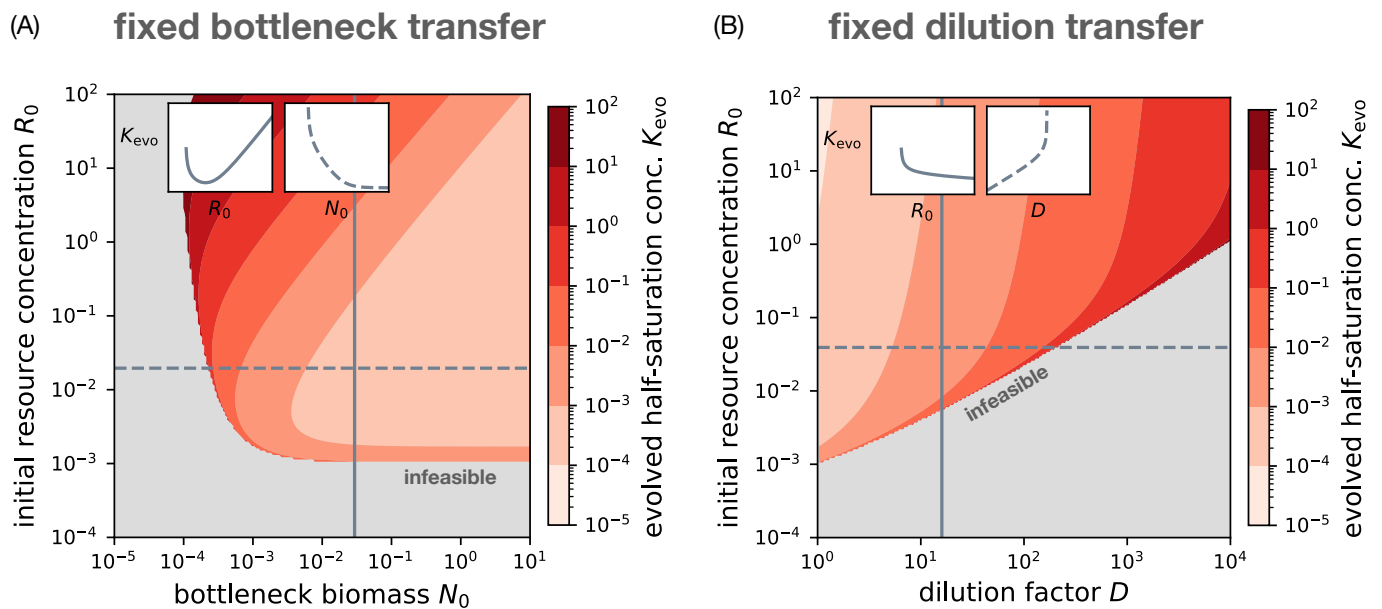

FIG. S26. **The evolved half-saturation concentration as a function of experimental parameters under coupled genetic drift.** (A) Same as Fig. S21A, but where the effective population size  $N_e$  is proportional to the biomass bottleneck  $N_0$  as in well-mixed laboratory experiments with fixed-bottleneck batch dynamics. We set  $N_e = N_0V$ , where  $V = 10^5$  is the culture volume such that a bottleneck biomass of  $N_0 = 0.01$  corresponds to an effective population size of  $N_e = 10^3$  cells. (B) Same as panel A but for fixed-dilution batch dynamics, where the effective population size is  $N_e = N_0V = VR_0Y/(D - 1)$  (Eq. (S21)).

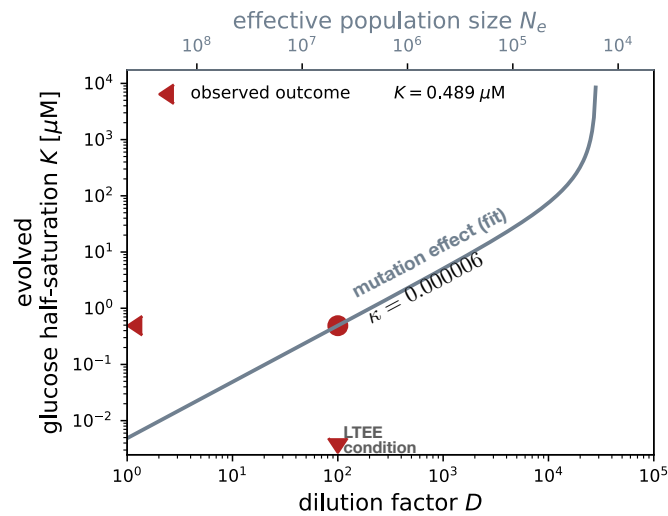

FIG. S27. **Inferred mutation effect for the Long-Term Evolution Experiment.** Evolved half-saturation concentration  $K_{\text{evo}}$  for glucose as a function of the dilution factor  $D$  under fixed-dilution batch dynamics. If we assume the glucose half-saturation for *E. coli* in the LTEE is under selection-drift balance, then we can use this dependence to infer the value of the mutation effect  $\kappa$  that would be consistent with the other known parameters of the system. We numerically solve for selection-drift balance using Eqs. (2) and (3) with dilution factor  $D = 100$ , initial glucose concentration  $R_0 = 139 \mu\text{M}$ , and evolved half-saturation concentration  $K = 0.489 \mu\text{M}$  (red dot). We obtain an estimate of  $\kappa = 6 \times 10^{-6}$ .

# Supplementary Information: Microbial population dynamics decouple growth response from environmental nutrient concentration

Justus Wilhelm Fink\*

*Institute of Integrative Biology, Department of Environmental Systems Science, ETH Zurich, Zurich, Switzerland*

Noelle A. Held

*Institute of Biogeochemistry and Pollutant Dynamics,  
Department of Environmental Systems Science, ETH Zurich, Zurich, Switzerland and  
Department of Environmental Microbiology, Swiss Federal Institute  
of Aquatic Science and Technology (Eawag), Dübendorf, Switzerland*

Michael Manhart†

*Institute of Integrative Biology, Department of Environmental Systems Science, ETH Zurich, Zurich, Switzerland  
Department of Environmental Microbiology, Swiss Federal Institute of  
Aquatic Science and Technology (Eawag), Dübendorf, Switzerland and  
Center for Advanced Biotechnology and Medicine and Department of Biochemistry and Molecular Biology,  
Robert Wood Johnson Medical School, Rutgers University, Piscataway, NJ, USA*

(Dated: November 18, 2022)

## S1. EFFECT OF COLIMITATION ON ESTIMATES OF MONOD GROWTH TRAITS

The Monod model (Eq. (1)) assumes there is only a single limiting resource whose concentration affects growth rate. However, microbes rely on multiple resources to grow, and therefore their growth rate may depend on the concentrations of all these resources simultaneously. Here we address how these other resources would affect the estimation of Monod growth traits for a focal resource. For simplicity, we consider the case of two essential, independent resources, where resource 1 is the focal resource (e.g., glucose) that we vary over a range of concentrations to measure its Monod parameters  $g_1^{\max}$  and  $K_1$ , and resource 2 is another resource (e.g., ammonium) that is fixed in the background medium. While there is no consensus on the best model for this behavior, we consider three of the most widely-used models:

Liebig model [1-3]:

$$g(R_1, R_2) = \min\left(\frac{g_1^{\max} R_1}{R_1 + K_1}, \frac{g_2^{\max} R_2}{R_2 + K_2}\right), \quad (\text{S1})$$

Additive model [1, 4]:

$$g(R_1, R_2) = g^{\max} \frac{R_1 R_2}{K_2 R_1 + R_1 R_2 + K_1 R_2}, \quad (\text{S2})$$

Multiplicative model [2, 4]:

$$g(R_1, R_2) = g^{\max} \left(\frac{R_1}{R_1 + K_1}\right) \left(\frac{R_2}{R_2 + K_2}\right). \quad (\text{S3})$$

Assuming one of these models is the true description of how growth rate depends on resource concentrations, we imagine fitting an apparent Monod model  $g_{\text{app}}(R_1)$  for resource 1 to data generated by the true model, with fixed  $R_2$ :

$$g_{\text{app}}(R_1) = g_{1,\text{app}}^{\max}(R_2) \frac{R_1}{R_1 + K_{1,\text{app}}(R_2)}, \quad (\text{S4})$$

where  $g_{1,\text{app}}^{\max}$  is the apparent maximum growth rate for resource 1 and  $K_{1,\text{app}}$  is its apparent half-saturation concentration, both of which may depend on the concentration  $R_2$  of resource 2. All of the true models correspond exactly to the apparent Monod model — with apparent parameters equaling the true ones,  $g_{1,\text{app}}^{\max} = g_1^{\max}$  and  $K_{1,\text{app}} = K_1$  — if the concentration  $R_2$  is much larger than its half-saturation concentration  $K_2$ , since the growth rate no longer depends on resource 2 once its concentration is saturating. Therefore  $R_2 \gg K_2$  is the general condition on the background resource which determines whether we are in the desired regime of limitation only for resource 1.

If the concentration  $R_2$  is smaller or not much larger than its half-saturation concentration  $K_2$ , we can then use the models to determine how colimitation with resource 2 affects estimates of Monod parameters for resource 1. For all of the true models, the apparent maximum growth rate  $g_{1,\text{app}}^{\max}$  is an underestimate of the true maximum growth rate  $g_1^{\max}$ . Specifically,

\* To whom correspondence should be addressed. Email: [jus-tus.fink@env.ethz.ch](mailto:jus-tus.fink@env.ethz.ch)

† To whom correspondence should be addressed. Email: [mmanhart@rutgers.edu](mailto:mmanhart@rutgers.edu)

Liebig model:

$$g_{1,\text{app}}^{\max}(R_2) \approx \min\left(g_1^{\max}, \frac{g_2^{\max} R_2}{R_2 + K_2}\right), \quad (\text{S5})$$

$$\text{Additive model: } g_{1,\text{app}}^{\max}(R_2) = g^{\max} \frac{R_2}{R_2 + K_2}, \quad (\text{S6})$$

Multiplicative model:

$$g_{1,\text{app}}^{\max}(R_2) = g^{\max} \frac{R_2}{R_2 + K_2}. \quad (\text{S7})$$

60 That is, the apparent maximum growth rate for resource  
61 1 is a Monod-type function of resource 2, meaning it is  
62 very close to the true  $g_1^{\max}$  for large  $R_2$  as expected, but  
63 becomes a significant underestimate when  $R_2$  is below  
64 its half-saturation concentration  $K_2$ . Note that the ap-  
65 parent parameters for the Liebig model are only approx-  
66 imate because the Liebig model will not exactly fit the  
67 Monod model for a single resource; this is because at  
68 some concentration there is a sharp transition in limita-  
69 tion between resources, owing to the minimum function.  
70 The apparent half-saturation  $K_{1,\text{app}}$  is also an underes-  
71 timate of the true  $K_1$  for the Liebig and additive models,  
72 but equals the true value for the multiplicative model:

Liebig model:

$$K_{1,\text{app}}(R_2) \approx \frac{K_1}{2 \frac{g_1^{\max}}{\min\left(g_1^{\max}, \frac{g_2^{\max} R_2}{R_2 + K_2}\right)} - 1}, \quad (\text{S8})$$

$$\text{Additive model: } K_{1,\text{app}}(R_2) = K_1 \frac{R_2}{R_2 + K_2}, \quad (\text{S9})$$

$$\text{Multiplicative model: } K_{1,\text{app}}(R_2) = K_1. \quad (\text{S10})$$

73 Note also that this means the apparent specific affinity  
74  $g_{1,\text{app}}^{\max}/K_{1,\text{app}}$  is always correct for the additive model,  
75 since the dependence on  $R_2$  cancels out between the ap-  
76 parent maximum growth rate and half-saturation, while  
77 it is biased for the Liebig and multiplicative models.

78 To what extent might these biases affect our data?  
79 We can test this condition in a subset of measurements  
80 for *E. coli* on glucose where the nitrogen source is am-  
81 monium and has a reported concentration. The mea-  
82 sured  $K$  for ammonium in *E. coli* is 2.6  $\mu\text{M}$  (Dataset S1,  
83 sheet 1). In the experiments that measure  $K$  for glucose,  
84 the ammonium concentrations are all orders of magni-  
85 tude higher (0.16 mM to 18.7 mM; Dataset S1, sheet 2).  
86 This indicates that ammonium was not colimiting with  
87 glucose in these experiments. Indeed, for almost all the

88 resources included in our data, the  $K$  half-saturation con-  
89 centrations are much lower than typical laboratory con-  
90 centrations. This is not surprising in light of our evo-  
91 lutionary model that predicts  $K$  will often evolve to be  
92 much lower than the environmental concentration of the  
93 resource (Eq. (4)), and presumably explains why colimi-  
94 tation of essential independent resources has been rarely  
95 observed empirically [3].

## 96 S2. ALTERNATIVE MODELS OF GROWTH 97 RATE DEPENDENCE ON RESOURCE 98 CONCENTRATIONS

99 Table S1 lists several common models for growth  
100 rate dependence on resource concentration  $R$ . Some of  
101 these models are mathematically equivalent; for example,  
102 Holling [11] proposed a classification scheme for growth  
103 models (commonly referred to as Type I, II, and III)  
104 for the response of predator growth rate on prey den-  
105 sity, which exactly corresponds to other models of growth  
106 in Table S1. Some of these models are also equiva-  
107 lent in certain limits. At high resource concentrations  
108  $R/K \gg 1$ , all of the models are approximately equiva-  
109 lent to the constant growth model, since the assumption  
110 is that resources are saturating and growth is limited by  
111 other processes. On the other hand, at low concentra-  
112 tions  $R/K \ll 1$ , the Monod, Blackman, and Bertalanffy  
113 models are approximately equivalent to the linear model.

114 There are also some important differences between  
115 models. The Blackman, Monod, Bertalanffy, and Hill  
116 models all saturate at high resource concentrations, but  
117 the nature of that saturation qualitatively differs. That  
118 is, the Monod model converges most slowly due its power  
119 law dependence on  $R$ . The Hill model also converges as  
120 a power law, but assuming  $n > 1$ , it does so more quickly  
121 than Monod. The Bertalanffy model converges even more  
122 rapidly due to its exponential dependence on  $R$ . Finally,  
123 the Blackman model converges to a constant immediately  
124 at the half-saturation concentration  $R = K$ .

125 The model most significantly different from the rest is  
126 the Droop model, since it depends not on the external  
127 resource concentration directly, but only on the resource  
128 concentration internal to the cell. Therefore this requires  
129 inclusion of a separate resource uptake process to be in-  
130 cluded in our framework. Under steady-state (chemo-  
131 stat) growth, this will also be equivalent to the Monod  
132 model under a shift in the resource concentration param-  
133 eter  $Q - Q_0 \rightarrow R$ , but under non-steady state conditions  
134 (e.g., batch dynamics), the Droop model can differ [16].

## 135 S3. MODEL OF BATCH POPULATION 136 DYNAMICS

137 For batch culture we describe the dynamics of the wild-  
138 type and mutant biomasses  $N_{\text{wt}}(t)$  and  $N_{\text{mut}}(t)$  and the

| model                                          | definition                                                                          | references                   |
|------------------------------------------------|-------------------------------------------------------------------------------------|------------------------------|
| constant                                       | $g(R) = g^{\max} \Theta(R)$                                                         | <a href="#">[5, 7]</a>       |
| linear                                         | $g(R) = g^L \cdot \frac{R}{K}$                                                      | <a href="#">[8]</a>          |
| Blackman or Holling Type I                     | $g(R) = g^{\max} \cdot \left(1 + \left(\frac{R}{K} - 1\right) \Theta(K - R)\right)$ | <a href="#">[9, 11]</a>      |
| Monod or Holling Type II                       | $g(R) = g^{\max} \cdot \frac{R}{R+K}$                                               | <a href="#">[11, 12]</a>     |
| Droop (depends on internal concentration $Q$ ) | $g(Q) = g^{\max} \cdot \frac{Q-Q_0}{Q}$                                             | <a href="#">[13-16]</a>      |
| Bertalanffy                                    | $g(R) = g^{\max} \left(1 - e^{-R/K}\right)$                                         | <a href="#">[4, 17]</a>      |
| Hill, Moser, or Holling Type III               | $g(R) = g^{\max} \cdot \frac{R^n}{R^n + K^n}$                                       | <a href="#">[11, 18, 19]</a> |

TABLE S1. **Overview of models for microbial population growth rate.** For each entry, the column “references” lists works that establish or build on the model and have been cited elsewhere in this text. The symbol  $\Theta$  denotes the Heaviside step function which is 1 for a positive argument and zero otherwise.

| definition                                        | definition                                                                                                                                                                                                |
|---------------------------------------------------|-----------------------------------------------------------------------------------------------------------------------------------------------------------------------------------------------------------|
| biomass concentrations $N_{wt}(t), N_{mut}(t)$    | effective growth rate $\bar{g}(R) = \frac{1-x}{Y_{wt}/\bar{Y}} \cdot g_{wt}(R) + \frac{x}{Y_{mut}/\bar{Y}} g_{mut}(R)$                                                                                    |
| initial mutant frequency $x$                      | effective yield $\bar{Y} = \left[\frac{1-x}{Y_{wt}} + \frac{x}{Y_{mut}}\right]^{-1}$                                                                                                                      |
| extracellular resource conc. $R(t)$               | effective max. growth rate $\bar{g}^{\max} = \frac{1-x}{Y_{wt}/\bar{Y}} \cdot g_{wt}^{\max} + \frac{x}{Y_{mut}/\bar{Y}} \cdot g_{mut}^{\max}$                                                             |
| initial biomass concentration $N_0$               | critical concentration $Z = K_{wt} K_{mut} \left[\frac{g_{wt}^{\max}/\bar{g}^{\max}}{Y_{wt}/\bar{Y}} \frac{1-x}{K_{wt}} + \frac{g_{mut}^{\max}/\bar{g}^{\max}}{Y_{mut}/\bar{Y}} \frac{x}{K_{mut}}\right]$ |
| initial resource concentration $R_0$              |                                                                                                                                                                                                           |
| population growth rates $g_{wt}(R), g_{mut}(R)$   |                                                                                                                                                                                                           |
| biomass yields $Y_{wt}, Y_{mut}$                  |                                                                                                                                                                                                           |
| max. growth rates $g_{wt}^{\max}, g_{mut}^{\max}$ |                                                                                                                                                                                                           |
| half-saturation concentration $K_{wt}, K_{mut}$   |                                                                                                                                                                                                           |
| specific affinity $a = g^{\max}/K$                |                                                                                                                                                                                                           |

TABLE S2. **Key notation and definitions used in the model.** The subscripts “wt” and “mut” correspond to *wild-type* and *mutant*. Sometimes we drop the subscript “wt” and use a plain letter ( $K$  or  $g^{\max}$  or  $a$ ) for the wild-type trait (for example, in the main text).

139 extracellular resource concentration  $R(t)$  using the fol-  
 140 lowing differential equations [\[20, 21\]](#):

$$\begin{aligned} \frac{1}{N_{wt}} \frac{dN_{wt}}{dt} &= g_{wt}(R), & N_{wt}(0) &= (1-x)N_0, \\ \frac{1}{N_{mut}} \frac{dN_{mut}}{dt} &= g_{mut}(R), & N_{mut}(0) &= xN_0, \\ \frac{dR}{dt} &= -\frac{1}{Y_{wt}} \frac{dN_{wt}}{dt} - \frac{1}{Y_{mut}} \frac{dN_{mut}}{dt}, & R(0) &= R_0. \end{aligned} \quad (S11)$$

141 See Table [S2](#) for a summary of the main notation and  
 142 definitions used throughout this article. Growth begins  
 143 with an external resource concentration  $R_0$  and total  
 144 biomass  $N_0$ , a fraction  $x$  of which is the mutant strain.  
 145 The strains then grow with per-capita rates  $g_{wt}(R)$  and  
 146  $g_{mut}(R)$ , which depend on the extracellular resource con-  
 147 centration  $R(t)$ ; here we neglect other growth dynam-  
 148 ics such as lag [\[5, 6\]](#) and death [\[22\]](#) for simplicity, but  
 149 they are straightforward to add within this framework.  
 150 The resource concentration  $R(t)$  declines in proportion to  
 151 growth of biomass, where the yields  $Y_{mut}$  and  $Y_{wt}$  for each

152 strain set the amount of new biomass per unit resource.  
 153 Here we neglect resource consumption due to mainte-  
 154 nance of existing biomass [\[23\]](#), since we expect consump-  
 155 tion for maintenance to be much less than consumption  
 156 for growth during rapid growth. Growth continues until  
 157 the resource is depleted or the growth rates reach zero.  
 158 While it is difficult to analytically solve these dynamics  
 159 in general, it is straightforward to numerically solve the  
 160 model for a given set of parameters (Sec. [S4](#)).

161 We note that for the Monod model in the limit of low  
 162 resource concentration  $R$ , or any model of growth rate  
 163 that depends approximately linearly on  $R$  (Table [S1](#)),  
 164 the batch dynamics of Eq. [S11](#) are equivalent to a lo-  
 165 gistic growth model. We can integrate the equation for  
 166 resource consumption  $dR/dt$  in Eq. [S11](#) to express the  
 167 current resource concentration  $R(t)$  as a function of the  
 168 biomasses of wild-type  $N_{wt}$  and mutant strain  $N_{mut}$ :

$$R = R_0 + \frac{N_0}{\bar{Y}} - \frac{N_{wt}}{Y_{wt}} - \frac{N_{mut}}{Y_{mut}}, \quad (S12)$$

169 where  $\bar{Y}$  is the effective population yield (Table [S2](#)). Sub-  
 170 stituting  $R$  from Eq. [\(S12\)](#) into the equations for  $dN_{wt}/dt$

171 and  $dN_{\text{mut}}/dt$  from Eq. [S11](#) with linear growth rate de-  
172 pendence ( $g(R) \approx g^{\text{max}}R/K$ ), we obtain

$$\frac{1}{N_{\text{wt}}} \frac{dN_{\text{wt}}}{dt} = \frac{g_{\text{wt}}^{\text{max}}}{K_{\text{wt}}} \left( R_0 + \frac{N_0}{\bar{Y}} - \frac{N_{\text{wt}}}{Y_{\text{wt}}} - \frac{N_{\text{mut}}}{Y_{\text{mut}}} \right), \quad (\text{S13a})$$

$$\frac{1}{N_{\text{mut}}} \frac{dN_{\text{mut}}}{dt} = \frac{g_{\text{mut}}^{\text{max}}}{K_{\text{mut}}} \left( R_0 + \frac{N_0}{\bar{Y}} - \frac{N_{\text{wt}}}{Y_{\text{wt}}} - \frac{N_{\text{mut}}}{Y_{\text{mut}}} \right). \quad (\text{S13b})$$

173 This is equivalent to logistic growth for both species or  
174 competitive Lotka-Volterra dynamics.

175 Once the resource  $R$  is depleted during a single cycle  
176 of batch growth, we transfer a fraction  $1/D$  of the popu-  
177 lation to an environment with a new supply of resources  
178 at the original concentration  $R_0$ , after which the popu-  
179 lation resumes growth in the new environment according  
180 to Eq. [S11](#). The factor  $D$  is known as the dilution fac-  
181 tor and is the ratio of the total biomass at the end of  
182 the previous growth cycle and the total biomass at the  
183 beginning of the next growth cycle [7](#).

184 In principle the dilution factor  $D$  and the bottleneck  
185 biomass concentration  $N_0$  can vary over each growth cy-  
186 cle, depending on how we perform the transfers. Let  
187 superscript  $n$  refer to the dynamics during the  $n$ th batch  
188 growth cycle over a series of dilutions and transfers. The  
189 biomass at the beginning of the  $(n+1)$ th cycle,  $N_0^{(n+1)}$ ,  
190 equals the biomass at the end of the previous cycle  $n$   
191 divided by the dilution factor  $D^{(n)}$  for that cycle:

$$N_0^{(n+1)} = \frac{1}{D^{(n)}} \left( N_{\text{wt}}^{(n)}(t_{\text{sat}}) + N_{\text{mut}}^{(n)}(t_{\text{sat}}) \right), \quad (\text{S14})$$

192 where  $t_{\text{sat}}$  is the saturation time of the growth cycle. To  
193 determine the relationship with the bottleneck size of the  
194 previous growth cycle, we use the relationship between  
195 resource and biomass concentrations (Eq. [S12](#)) to show  
196 that at the end of the growth cycle,  $R(t_{\text{sat}}) = 0$ , and so

$$\begin{aligned} R^{(n)}(t_{\text{sat}}) &= 0 \\ &= R_0 + \frac{N_0^{(n)}}{\bar{Y}^{(n)}} - \frac{N_{\text{wt}}^{(n)}(t_{\text{sat}})}{Y_{\text{wt}}} - \frac{N_{\text{mut}}^{(n)}(t_{\text{sat}})}{Y_{\text{mut}}}. \end{aligned} \quad (\text{S15})$$

197 Using this, we can insert the identity to obtain

$$\begin{aligned} N_0^{(n+1)} &= \frac{1}{D^{(n)}} \left( N_{\text{wt}}^{(n)}(t_{\text{sat}}) + N_{\text{mut}}^{(n)}(t_{\text{sat}}) \right) \\ &= \frac{1}{D^{(n)}} \left( \frac{R_0 + \frac{N_0^{(n)}}{\bar{Y}^{(n)}}}{\frac{N_{\text{wt}}^{(n)}(t_{\text{sat}})}{Y_{\text{wt}}} + \frac{N_{\text{mut}}^{(n)}(t_{\text{sat}})}{Y_{\text{mut}}}} \right) \\ &\quad \cdot \left( N_{\text{wt}}^{(n)}(t_{\text{sat}}) + N_{\text{mut}}^{(n)}(t_{\text{sat}}) \right) \\ &= \frac{1}{D^{(n)}} \left( R_0 + \frac{N_0^{(n)}}{\bar{Y}^{(n)}} \right) \left( \frac{1 - x^{(n+1)}}{Y_{\text{wt}}} + \frac{x^{(n+1)}}{Y_{\text{mut}}} \right)^{-1} \end{aligned} \quad (\text{S16})$$

198 where we have used the fact that the frequencies of each  
199 strain at the end of the  $n$ th cycle equal their frequencies  
200 at the beginning of the  $(n+1)$ th cycle:

$$\frac{N_{\text{mut}}^{(n)}(t_{\text{sat}})}{N_{\text{wt}}^{(n)}(t_{\text{sat}}) + N_{\text{mut}}^{(n)}(t_{\text{sat}})} = x^{(n+1)}. \quad (\text{S17})$$

201 Using the equation for the effective yield (Table [S2](#)), we  
202 obtain

$$N_0^{(n+1)} = \frac{1}{D^{(n)}} \left( R_0 + \frac{N_0^{(n)}}{\bar{Y}^{(n)}} \right) \bar{Y}^{(n+1)}. \quad (\text{S18})$$

203 This establishes the general relationship between the bot-  
204 tleneck size and the dilution factor.

205 Under fixed-bottleneck batch dynamics (Fig. 4B, top  
206 panel),  $N_0^{(n)}$  is a constant value  $N_0$ , and so we can re-  
207 arrange Eq. [S18](#) to determine how the dilution factor  
208 varies at each cycle:

$$D^{(n)} = \frac{R_0 \bar{Y}^{(n+1)}}{N_0} + \frac{\bar{Y}^{(n+1)}}{\bar{Y}^{(n)}}. \quad (\text{S19})$$

209 This shows that the dilution factor changes only if the  
210 strains have different yields, such that the effective yields  
211  $\bar{Y}^{(n)}$  change over cycles as the strain frequencies change.  
212 On the other hand, under fixed-dilution batch dynam-  
213 ics (Fig. 4B, bottom panel),  $D^{(n)}$  is a constant  $D$ , and  
214 Eq. [S18](#) simplifies to

$$N_0^{(n+1)} = \frac{1}{D} \left( R_0 + \frac{N_0^{(n)}}{\bar{Y}^{(n)}} \right) \bar{Y}^{(n+1)}. \quad (\text{S20})$$

215 Under both serial transfer regimes, the steady state oc-  
216 curs when  $D^{(n+1)} = D^{(n)}$ ,  $N_0^{(n+1)} = N_0^{(n)}$ , and  $\bar{Y}^{(n+1)} =$   
217  $\bar{Y}^{(n)}$ , which implies

$$D = \frac{R_0 \bar{Y}}{N_0} + 1. \quad (\text{S21})$$

218 This steady state occurs if 1) all strains have the same  
219 yields, such that the effective yield is constant; 2) one  
220 strain goes extinct; or 3) the two strains stably coexist.

#### 221 S4. NUMERICAL METHODS FOR BATCH 222 DYNAMICS

223 It is not possible to analytically solve the ordinary dif-  
224 ferential equations for batch dynamics (Eq. [S11](#)). To ob-  
225 tain explicit solutions to this model, we therefore numeri-  
226 cally integrate the equations using the Scipy package [24](#).  
227 We use the default Runge-Kutta algorithm ‘‘RK45’’ in  
228 the function `solve_ivp`. This interpolates the differential



equation in fourth-order expansion over a short step size  $\delta t$ . The step size is automatically adjusted by `solve_ivp` to keep the error of integration below a threshold fixed by the user through the parameters `atol` and `rtol`. Our choices of `atol` =  $10^{-12}$  and `rtol` =  $10^{-8}$  are more restrictive than the default setting and ensure low errors on the state variables  $N_{wt}$ ,  $N_{mut}$ , and  $R$ .

The population dynamics in Eq. [S11](#) reach the final equilibrium when all resources have been converted into biomass. This final equilibrium is the only attractor since the resources are finite and biomass is strictly increasing (no cell death within a batch growth cycle); in particular, this system does not allow for limit cycles. However, the time to reach this equilibrium is infinite for all growth models in Table [S1](#) (including the Monod model) except for the constant growth rate model. This is because the smooth decline of growth rate prevents full depletion of resources and allows populations to grow indefinitely at infinitesimal but strictly positive growth rates. (The constant growth rate model allows for the same growth rate at arbitrarily low resource concentrations, which means the resources deplete to zero in finite time [\[5-7\]](#).)

For numerical calculations we must therefore set a finite saturation time  $t_{sat}$  such that the population dynamics are sufficiently close to their equilibrium state. We choose this time using the selection coefficient, which quantifies the relative change in the strain frequencies. Define the cumulative selection coefficient up to time  $t$  for a batch growth cycle as

$$s_t = \log \left( \frac{N_{mut}(t)}{N_{wt}(t)} \right) - \log \left( \frac{N_{mut}(0)}{N_{wt}(0)} \right). \quad (\text{S22})$$

(We further motivate this definition of selection in Sec. [S6](#).) The total selection coefficient for the batch cycle is the cumulative selection coefficient in the limit of infinite time:

$$s = \lim_{t \rightarrow \infty} s_t. \quad (\text{S23})$$

We want to define the saturation time  $t_{sat}$  as the time where the difference between the cumulative selection up to that time and the total selection is less than some tolerance. We can do this by determining an upper bound on the difference between total selection  $s$  and the selection at finite time  $t$ . As the population continues to grow after time  $t$ , the change in frequencies is bounded by the remaining available resources  $R(t)$ . The two possible extremes are if all remaining resources go to the wild-type, in which case the biomass of the wild-type increases by  $R(t)Y_{wt}$  and the mutant biomass remains constant, or if all remaining resources go to the mutant, in which case the biomass of the mutant increases by  $R(t)Y_{mut}$  and the wild-type remains constant. Therefore the largest possible change in selection occurs in one of these two scenarios, and so the deviation in selection at time  $t$  from its equilibrium value is bounded by

$$|s_t - s| \leq \max \left\{ \log \left( 1 + \frac{R(t)Y_{mut}}{N_{mut}(t)} \right), \log \left( 1 + \frac{R(t)Y_{wt}}{N_{wt}(t)} \right) \right\}. \quad (\text{S24})$$

We define the saturation time  $t_{sat}$  as the shortest time (infimum) such that the difference between the cumulative selection at that time and the total selection is smaller than a given error tolerance  $\epsilon > 0$ :

$$t_{sat} = \inf \{ t > 0 : |s_t - s| < \epsilon \}. \quad (\text{S25})$$

We implement this algorithmically by evaluating the simulation up to an initial time  $t$ , then evaluating the maximum future error on the selection coefficient from the right hand side of Eq. [\(S24\)](#), and then extending the simulation to  $t + 10$  if the error exceeds a defined tolerance  $\epsilon = 10^{-8}$ . We iterate this process until the error is less than the threshold.

## S5. MODEL OF CHEMOSTAT POPULATION DYNAMICS

Similar to the batch model of Eq. [\(S11\)](#), the dynamics of biomass and resource concentrations under continuous culture (chemostat) are

$$\frac{1}{N_{wt}} \frac{dN_{wt}}{dt} = g_{wt}(R) - d, \quad N_{wt}(0) = (1-x)N_0,$$

$$\frac{1}{N_{mut}} \frac{dN_{mut}}{dt} = g_{mut}(R) - d, \quad N_{mut}(0) = xN_0,$$

$$\begin{aligned} \frac{dR}{dt} = & -g_{wt}(R) \frac{N_{wt}(t)}{Y_{wt}} - g_{mut}(R) \frac{N_{mut}(t)}{Y_{mut}} \\ & + d(R_{source} - R(t)), \\ R(0) = & R_0, \end{aligned} \quad (\text{S26})$$

where  $R_{source}$  is the concentration of the resource in the source media fed into the culture. In a laboratory chemostat, the dilution rate is  $d = \omega/V$ , where  $\omega$  is the outflow rate (volume per time) and  $V$  is the volume of the culture vessel [\[25\]](#).

In the SSWM regime where mutations arise only rarely (Sec. [S11](#)), we can assume that the mutant arises on the background of the wild-type at steady-state growth. Let  $N_{wt}^*$  be the steady-state concentration of wild-type biomass and  $R^*$  be the steady-state concentration of the resource. Note that  $R^*$  here is the chemostat-specific realization of the ecological concept of a minimum resource concentration required for positive net growth, as used in resource-ratio theory [\[26, 27\]](#). Since  $dN_{wt}/dt = 0$  in steady state, the resource concentration  $R^*$  must satisfy

$$g_{\text{wt}}(R^*) = d. \quad (\text{S27})$$

For the Monod model, we can solve this explicitly for  $R^*$  to obtain

$$R^* = K_{\text{wt}} \frac{d}{g_{\text{wt}}^{\text{max}} - d}. \quad (\text{S28})$$

Note that this concentration  $R^*$  is independent of the source concentration  $R_{\text{source}}$ . Using the steady-state condition for the resource  $dR/dt = 0$ , we can then obtain the steady-state biomass concentration

$$N_{\text{wt}}^* = (R_{\text{source}} - R^*)Y_{\text{wt}}. \quad (\text{S29})$$

This establishes a feasibility condition for steady state: the dilution rate  $d$  must be less than the growth rate at the source concentration  $g_{\text{wt}}(R_{\text{source}})$ , which is the maximum that the culture can realize for the given resource supply. This criterion has been used by Jannasch [28, 29] to define a *minimum resource threshold* required for population growth at a given dilution factor  $d$ . This minimum resource threshold corresponds to the steady-state concentration  $R^*$ , which is related to the parameter  $K$  but also depends on  $d$ .

## S6. DEFINITION OF SELECTION COEFFICIENT

The instantaneous selection coefficient  $\sigma(t)$  measures the rate of change in the logarithm of relative mutant frequency:

$$\sigma(t) = \frac{d}{dt} \log \left( \frac{N_{\text{mut}}(t)}{N_{\text{wt}}(t)} \right). \quad (\text{S30})$$

This is a sufficient statistic for frequency change in the sense that knowledge of the instantaneous selection coefficient and the current mutant frequency is sufficient to predict the future mutant frequency over a short time horizon.

For population growth under batch dynamics, the repeated bottlenecks between growth cycles introduce randomness in the frequency trajectory of a mutant. We assume that this stochastic sampling at transfer dominates over the random fluctuations in individual birth rates within the growth cycle. Thus, the genetic drift in our model of serial transfer evolution occurs at the timescale of one growth cycle. To compare the strength of drift and selection on the same timescale, we integrate the instantaneous selection coefficient (Eq. (S30)) over time

$$s = \frac{1}{\Delta t} \int_0^{\Delta t} \sigma(t) dt, \quad (\text{S31})$$

where  $\Delta t$  is the length of the growth cycle. Note that the selection coefficient  $s$  is still defined as a rate per unit time and in the limit  $\Delta t \rightarrow 0$  exactly matches the instantaneous selection coefficient (Eq. (S30)).

For batch dynamics the selection coefficient  $s$  determines the change of frequency over multiple growth cycles. At the beginning of the  $n$ th cycle, the initial mutant frequency  $x^{(n)}$  is given by

$$x^{(n)} = \frac{N_{\text{mut}}^{(n)}(0)}{N_{\text{mut}}^{(n)}(0) + N_{\text{wt}}^{(n)}(0)}, \quad (\text{S32})$$

where  $N_{\text{wt}}^{(n)}$  and  $N_{\text{mut}}^{(n)}$  refer to the biomass of wild-type and mutant strains. The population grows to saturation and possibly experiences some frequency change, which sets the mutant frequency  $x^{(n+1)}$  of the next cycle. This change is summarized by the selection coefficient

$$s^{(n)} = \log \left( \frac{x^{(n+1)}}{1 - x^{(n+1)}} \right) - \log \left( \frac{x^{(n)}}{1 - x^{(n)}} \right), \quad (\text{S33})$$

which we compute from the integral definition (Eq. (S31)) using a timescale of  $\Delta t = 1$  (per growth cycle). Knowledge of  $s^{(n)}$  is sufficient to predict the initial mutant frequency in the next cycle

$$x^{(n+1)} = \frac{x^{(n)} \exp(s^{(n)})}{1 + x^{(n)} [\exp(s^{(n)}) - 1]}, \quad (\text{S34})$$

neglecting the stochastic effects of the dilution. Thus, given the starting mutant frequency  $x^{(1)}$  and the selection coefficients for each growth cycle  $s^{(n)}$ , the recursion in Eq. (S34) allows us to predict the mutant frequency trajectory without simulating the population dynamics within each growth cycle.

## S7. DERIVATION OF THE SELECTION COEFFICIENT FOR BATCH DYNAMICS

For populations growing in batch culture, the selection coefficient reduces to the cumulative difference of growth rates:

$$s = \int_0^{\infty} [g_{\text{mut}}(R(t)) - g_{\text{wt}}(R(t))] dt, \quad (\text{S35})$$

where we have inserted the equations for mutant and wild-type growth from our model of populations dynamics (Eq. (S11)) into the definition of  $s$  from Eq. (S31). The integral extends to infinite time for the growth dynamics to reach equilibrium (Sec. (S4)) so we therefore do not normalize by the time scale as in Eq. (S31); rather we leave it as understood that the selection coefficient is defined per growth cycle. We can change variables of the integral in Eq. (S35) from time  $t$  to resource concentration  $R$ :

$$s = \int_{R_0}^0 [g_{\text{mut}}(R) - g_{\text{wt}}(R)] \cdot \frac{1}{dR/dt} dR, \quad (\text{S36})$$

where we have used the fact that  $R$  ranges from  $R_0$  at the beginning of the growth cycle to 0 at the end of the growth cycle, and that  $R$  depends monotonically on  $t$  so that  $dt/dR = (dR/dt)^{-1}$ .

To compute this integral, we need to express the transient resource consumption rate  $dR/dt$  as an explicit function of current resource concentration  $R$ . As a first step, we rewrite the differential equation for resources (Eq. S11) into the product form

$$\frac{d}{dt}R(t) = -\frac{N_{\text{wt}}(t) + N_{\text{mut}}(t)}{\bar{Y}} \cdot \left[ \frac{1-x(t)}{Y_{\text{wt}}/\bar{Y}} g_{\text{wt}}(R) + \frac{x(t)}{Y_{\text{mut}}/\bar{Y}} g_{\text{mut}}(R) \right], \quad (\text{S37})$$

where we use the shorthand  $\bar{Y}$  for the effective biomass yield (Table S2). This product separates into the joint biomass  $N_{\text{wt}}(t) + N_{\text{mut}}(t)$  and a new parameter, that we term the *effective growth rate*:

$$\bar{g}(t, R) = \frac{1-x(t)}{Y_{\text{wt}}/\bar{Y}} g_{\text{wt}}(R) + \frac{x(t)}{Y_{\text{mut}}/\bar{Y}} g_{\text{mut}}(R). \quad (\text{S38})$$

Equation S37 suggests that this mean of wild-type and mutant growth rates acts as the effective growth rate of the joint population  $N_{\text{wt}}(t) + N_{\text{mut}}(t)$ . This effective growth rate is time-dependent due to the underlying frequency change  $x(t)$ . Using this equation for the joint biomass (derived from Eq. S12)

$$N_{\text{wt}}(t) + N_{\text{mut}}(t) = \left( R_0 - R(t) + \frac{N_0}{\bar{Y}} \right) \bar{Y}(t), \quad (\text{S39})$$

we insert this and the equation for mean growth rate (Eq. S38) into Eq. S36 for the selection coefficient:

$$s = \int_0^{R_0} \left( \frac{g_{\text{mut}}(R) - g_{\text{wt}}(R)}{\bar{g}(t(R), R)} \right) \cdot \left( \frac{1}{N_0/\bar{Y} + R_0 - R} \right) dR. \quad (\text{S40})$$

Equation S40 is an exact expression but requires full knowledge of the resource trajectory  $R(t)$  and its inverse  $t(R)$  to calculate the mean growth rate  $\bar{g}(t(R), R)$  in the denominator. For a constant growth rate model (Table S1), this exact expression can be computed [5, 6]. However, for general growth models  $g(R)$  and the Monod model in particular, the integral Eq. S40 can only be solved under an approximation. Previous work invoked the assumption of small initial mutant frequency  $x \ll 1$  to replace mean growth rate and effective biomass yield by the wild-type traits [20, 21], but here we introduce a novel approximation that holds for all initial mutant frequencies.

We assume that the frequency change over the growth cycle is small, such that the mean growth rate only depends on the resource concentration

$$\bar{g}(R) \approx \frac{1-x}{Y_{\text{wt}}/\bar{Y}} g_{\text{wt}}(R) + \frac{x}{Y_{\text{mut}}/\bar{Y}} g_{\text{mut}}(R), \quad (\text{S41})$$

but not otherwise on time  $t$ . That is, we neglect the time dependence of the mutant frequency  $x(t)$ . Thus, we get the explicit integral formula for the selection coefficient:

$$s \approx \int_0^{R_0} \left( \frac{g_{\text{mut}}(R) - g_{\text{wt}}(R)}{\bar{g}(R)} \right) \cdot \left( \frac{1}{N_0/\bar{Y} + R_0 - R} \right) dR. \quad (\text{S42})$$

This equation neglects the frequency change  $x(t)$  within the growth cycle but still includes dependence on the initial mutant frequency  $x$ . One can show that the approximate integral in Eq. S42 corresponds to a first-order expansion of the exact integral (Eq. S40) in terms of transient selection coefficients inside the growth cycle, meaning that it is equivalent to a weak-selection approximation. We numerically evaluate the accuracy of this approximation in the case of the Monod model in the next section (Sec. S8).

The exact selection coefficient in its integral form (Eq. S40) reveals generic properties of batch-culture competition. First, there is no direct selection for cell yield. A mutant with higher efficiency  $Y_{\text{mut}}$  but equal growth response is neutral. Thus, with an uncorrelated mutation supply, we expect cell yield to evolve neutrally [7, 30]. Second, the selection on the growth rate function  $g(R)$  is distributed unequally across concentrations. In the integrand of Eq. S40, the difference in growth rates at each resource concentration  $R$  is weighted by the *fold-change spectrum*  $1/(N_0/\bar{Y} + R_0 - R)$ . This weight peaks at the initial resource concentration  $R_0$  (see Fig. S13A) and is independent of the growth rate model  $g(R)$ . For growth cycles with large fold-change ( $R_0 Y/N_0 \gg 1$ ), the selection coefficient  $s$  roughly corresponds to the growth rate difference at initial concentrations because most generations occur at near-constant concentrations close to  $R_0$  (compare Fig. S13B).

A third important property holds only approximately in Eq. S42, where we see that selection only acts on ratios of growth rates, since the growth rates appear in both the numerator and denominator of the integrand. The dependence on growth rate ratios means that alternative growth models can still lead to equivalent selection on traits. For example, if we take any growth rate model from Table S1 where the mutant and wild-type differ only in their maximum growth rates  $g^{\text{max}}$  (but not other parameters such as  $K$ ), then their selection coefficients will depend only on the ratio  $g_{\text{mut}}^{\text{max}}/g_{\text{wt}}^{\text{max}}$  and not other details of the specific model.

439 **S8. CALCULATION OF THE SELECTION**  
440 **COEFFICIENT FOR THE MONOD MODEL**

In this section, we apply the integral formula Eq. (S42) to calculate the selection coefficient for a wild-type and mutant strain competing under the Monod model. Let

$$\Delta g^{\max} = g_{\text{mut}}^{\max} - g_{\text{wt}}^{\max}, \quad \Delta K = K_{\text{mut}} - K_{\text{wt}} \quad (\text{S43})$$

denote the absolute trait differences in maximum growth rate and half-saturation concentration between the two strains. First, we rewrite the relative growth rate difference

$$\frac{g_{\text{mut}}(R) - g_{\text{wt}}(R)}{\bar{g}(R)} = \frac{\Delta g^{\max}}{\bar{g}^{\max}} - \frac{\Delta K}{R + Z} \cdot \frac{g_{\text{wt}}^{\max} g_{\text{mut}}^{\max}}{\bar{g}^{\max} \bar{g}^{\max}}, \quad (\text{S44})$$

using the effective maximum growth rate

$$\bar{g}^{\max} = \frac{1-x}{Y_{\text{wt}}/\bar{Y}} \cdot g_{\text{wt}}^{\max} + \frac{x}{Y_{\text{mut}}/\bar{Y}} \cdot g_{\text{mut}}^{\max} \quad (\text{S45})$$

and the critical resource concentration

$$Z = K_{\text{wt}} K_{\text{mut}} \cdot \left[ \frac{g_{\text{wt}}^{\max}/\bar{g}^{\max}}{Y_{\text{wt}}/\bar{Y}} \cdot \frac{1-x}{K_{\text{wt}}} + \frac{g_{\text{mut}}^{\max}/\bar{g}^{\max}}{Y_{\text{mut}}/\bar{Y}} \cdot \frac{x}{K_{\text{mut}}} \right] \quad (\text{S46})$$

441 as effective traits of the joint population to simplify the  
442 notation (Table S2). Equation (S44) consists of two  
443 terms, one proportional to the difference in maximum  
444 growth rates  $\Delta g^{\max}$  and the other proportional to the  
445 difference in half-saturation concentrations  $\Delta K$ . There-  
446 fore after substituting this expression into Eq. (S42) and  
447 carrying out the integral over  $R$ , we obtain a selection  
448 coefficient consisting of two distinct components:

$$s \approx s_{\text{high}} + s_{\text{low}} \quad (\text{S47a})$$

where

$$s_{\text{high}} = \frac{\Delta g^{\max}}{\bar{g}^{\max}} \log \left( 1 + \frac{R_0 \bar{Y}}{N_0} \right) \quad (\text{S47b})$$

$$s_{\text{low}} = - \frac{\Delta K}{R_0 + N_0/\bar{Y} + Z} \left( \frac{g_{\text{wt}}^{\max} g_{\text{mut}}^{\max}}{\bar{g}^{\max} \bar{g}^{\max}} \right) \cdot \log \left( \left( 1 + \frac{R_0 \bar{Y}}{N_0} \right) \left( 1 + \frac{R_0}{Z} \right) \right). \quad (\text{S47c})$$

449 This is the basis for Eq. (2) in the main text under batch  
450 dynamics.

451 The formula for the selection coefficient in Eq. (S42) is  
452 based on an approximation of small frequency change. In  
453 Fig. S14 we compare the approximate selection coefficient

454 against the exact selection coefficient obtained from nu-  
455 merically solving the differential equations for batch dy-  
456 namics (Eq. S11). The simulations show that the approx-  
457 imate selection coefficient is accurate up to large values  
458 of order  $s \approx 1$ . This means that, while we mainly con-  
459 sider the scenario of weak selection ( $|s| < 1$ ), the approx-  
460 imation is excellent even when selection is strong. Intu-  
461 itively, the approximation should break down because of  
462 wrongly estimating the mean resource consumption rate,  
463 which we expect to occur when the yields and realized  
464 growth rates differ strongly between the two strains. In  
465 Fig. S15 we also show a phase diagram of this selection  
466 coefficient as a function of the mutant's traits  $g^{\max}$  and  
467  $K$  relative to their wild-type values.

468 The decomposition in Eq. (S47) is useful because the  
469 terms correspond to components of selection on distinct  
470 phases of growth. The first component,  $s_{\text{high}}$ , measures  
471 selection on growth at high resource concentrations, and  
472 is therefore proportional to the mutational change  $\Delta g^{\max}$   
473 in the trait  $g^{\max}$ . This mutational effect is weighed by the  
474 logarithm of the total fold-change of growth, which equals  
475 the dilution factor  $D = R_0 Y/N_0 + 1$  (Eq. (S21)). An im-  
476 portant feature of selection  $s_{\text{high}}$  is that it depends on  
477 the nominal maximum growth rate  $g^{\max}$ , which is always  
478 greater than the realized maximum growth rate  $g(R_0)$   
479 that actually occurs at the beginning of growth. There-  
480 fore the calculation of selection from actual growth data  
481 requires an inference of these nominal rates, since the re-  
482 alized rates measured at the beginning of growth curves  
483 could produce misleading results if growth begins at low  
484 resource concentrations [31].

485 The second component of selection,  $s_{\text{low}}$ , corresponds  
486 to growth at low resource concentrations, and is propor-  
487 tional to the mutant's change  $\Delta K$  of the half-saturation  
488  $K$ . There is a negative sign in  $s_{\text{low}}$  since selection  
489 is positive for mutations that decrease  $K$  ( $\Delta K < 0$ ).  
490 For the hypothetical mutant and wild-type in Figs. 1  
491 and 4A,B,  $s_{\text{high}} = 0$  since the mutant does not change  
492  $g^{\max}$ , while  $s_{\text{low}} \approx 0.516$ , since the mutant has a signifi-  
493 cantly lower half-saturation concentration  $K$ . In Fig. S16  
494 we show a more complex pair of strains with a gleaner-  
495 opportunist tradeoff (one strain has higher  $g^{\max}$  but  
496 also higher  $K$ ), where both components of selection are  
497 nonzero [20, 21, 27, 32].

We also briefly discuss an interpretation for the pa-  
parameter  $Z$ . The instantaneous selection coefficient  
(Eq. (S30)) within the batch culture growth cycle

$$\sigma(t) = g_{\text{mut}}(R(t)) - g_{\text{wt}}(R(t)) \quad (\text{S48})$$

can be decomposed into two components

$$\sigma = \sigma_{\text{max}} + \sigma_{\text{lin}}, \quad (\text{S49a})$$

where

$$\sigma_{\text{max}} = \Delta g^{\max} \frac{R}{R + K_{\text{wt}}} \frac{R}{R + K_{\text{mut}}}, \quad (\text{S49b})$$

$$\sigma_{\text{lin}} = \Delta a \cdot R \frac{K_{\text{wt}}}{R + K_{\text{wt}}} \frac{K_{\text{mut}}}{R + K_{\text{mut}}}. \quad (\text{S49c})$$

498 Here  $a = g^{\max}/K$  is the specific affinity, and  $\Delta a$  is the dif-  
 499 ference in specific affinities between the mutant and the  
 500 wild-type. The first component  $\sigma_{\max}$  quantifies growth  
 501 rate difference at excess conditions, where both strains  
 502 grow close to their maximum growth rates. The sec-  
 503 ond component  $\sigma_{\text{lin}}$  measures growth rate differences in  
 504 the opposite regime, where both strains grow below their  
 505 half-saturation concentration. The relative size of the  
 506 two components varies shifts with resource concentration  
 507 and also depends on the mutation effect on maximum  
 508 growth rate and specific affinity.

509 The effective parameter  $Z$  acts as an intrinsic scale  
 510 in the resource dependence. Normalizing for different  
 511 relative mutation effects, both components contribute  
 512 equally to growth rate difference exactly at external con-  
 513 centration  $R = Z$  such that

$$\frac{\sigma_{\max}(Z)}{\Delta g^{\max}/\bar{g}^{\max}} = \frac{\sigma_{\text{lin}}(Z)}{\Delta a/\bar{a}}, \quad (\text{S50})$$

514 where the effective specific affinity  $\bar{a}$  is defined (in anal-  
 515 ogy with the effective maximum growth rate defined in  
 516 Eq. (S45)) as

$$\bar{a} = \frac{1-x}{Y_{\text{wt}}/\bar{Y}} \cdot \frac{g_{\text{wt}}^{\max}}{K_{\text{wt}}} + \frac{x}{Y_{\text{mut}}/\bar{Y}} \cdot \frac{g_{\text{mut}}^{\max}}{K_{\text{mut}}}. \quad (\text{S51})$$

517 This means, at concentration  $Z$  both components of the  
 518 growth rate difference in Eq. (S49) receive equal selection  
 519 pressure.

520 The decomposition in Eq. (S49) more generally sug-  
 521 gests an alternative parametrization of the Monod model  
 522 and its selection coefficient. We can replace the half-  
 523 saturation concentration  $K$  by the specific affinity  $a =$   
 524  $g^{\max}/K$ . This alternative trait corresponds to the growth  
 525 rate in the limit of low resource concentrations where the  
 526 Monod model behaves linearly (see Sec. S2). The selec-  
 527 tion coefficient in Eq. (S47) can be rewritten as

$$s \approx s_{\max} + s_{\text{lin}}, \quad (\text{S52a})$$

where

$$s_{\max} = \frac{\Delta g^{\max}}{\bar{g}^{\max}} \quad (\text{S52b})$$

$$\begin{aligned} & \cdot \left[ \frac{R_0 + N_0/\bar{Y}}{R_0 + N_0/\bar{Y} + Z} \cdot \log \left( 1 + \frac{R_0 \bar{Y}}{N_0} \right) \right. \\ & \quad \left. - \frac{Z}{R_0 + N_0/\bar{Y} + Z} \cdot \log \left( 1 + \frac{R_0}{Z} \right) \right], \\ s_{\text{lin}} &= \frac{\Delta a}{\bar{a}} \cdot \left[ \frac{Z}{R_0 + N_0/\bar{Y} + Z} \right. \\ & \quad \left. \cdot \log \left( 1 + \frac{R_0 \bar{Y}}{N_0} \right) \left( 1 + \frac{R_0}{Z} \right) \right]. \end{aligned} \quad (\text{S52c})$$

528 The selection coefficient maps the life-history traits  
 529 to relative fitness, and the parametrization in  $a$  is well-  
 530 suited to study the structure of this map under environ-  
 531 mental variation. In the limit of high nutrient concen-  
 532 trations, the total resources are large compared to the  
 533 critical concentration  $Z$ . The selection coefficient then  
 534 reduces to the component of maximum growth:

$$s \approx s_{\max} \quad \text{as } R_0 \rightarrow \infty. \quad (\text{S53})$$

In the opposite limit, the selection coefficient only acts  
 on the growth rate at low concentrations. In this sense,  
 the selection coefficient recovers the limiting behaviour  
 of the underlying growth response:

$$s \approx s_{\text{lin}} \quad \text{as } R_0 \rightarrow 0. \quad (\text{S54})$$

535 This means that  $g^{\max}$  and  $a$  are the marginal traits that  
 536 exclusively control growth in the limiting environments.  
 537 The selection coefficient reduces to one component or the  
 538 other. For the parametrization based on  $K$  given below,  
 539 this is not true — both  $g^{\max}$  and  $K$  contribute at low  
 540 concentrations.

## 541 S9. DERIVATION OF THE SELECTION 542 COEFFICIENT FOR CHEMOSTAT DYNAMICS

543 For a population in chemostat conditions (Eq. (S26)),  
 544 the instantaneous selection coefficient  $\sigma(t)$  (Eq. (S30))  
 545 only depends on the difference in growth rates. At a given  
 546 resource concentration  $R(t)$ , this growth rate difference  
 547 can be decomposed in to two trait components

$$\sigma \approx \sigma_{\text{high}} + \sigma_{\text{low}}, \quad (\text{S55a})$$

where

$$\sigma_{\text{high}} = \frac{\Delta g^{\max}}{\bar{g}^{\max}} \bar{g}(R), \quad (\text{S55b})$$

$$\sigma_{\text{low}} = -\frac{\Delta K}{R+Z} \frac{g_{\text{wt}}^{\max}}{\bar{g}^{\max}} \frac{g_{\text{mut}}^{\max}}{\bar{g}^{\max}} \bar{g}(R). \quad (\text{S55c})$$

We can derive this by multiplying Eq. (S44) with the  
 mean growth rate for the Monod model

$$\begin{aligned} \bar{g}(R) &= \bar{g}^{\max} \frac{R}{R+K_{\text{wt}}} \frac{R}{R+K_{\text{mut}}} \\ & \quad + \bar{a} R \frac{K_{\text{wt}}}{R+K_{\text{wt}}} \frac{K_{\text{mut}}}{R+K_{\text{mut}}}. \end{aligned} \quad (\text{S56})$$

548 The two components  $\sigma_{\text{high}}$  and  $\sigma_{\text{low}}$  are consistent with  
 549 our results for batch culture conditions (Eq. (S47)). By  
 550 integrating the instantaneous component  $\sigma_{\text{high}}$  over the  
 551 growth cycle, we recover the component  $s_{\text{high}}$  for batch-  
 552 culture growth.

We assume a specific scenario for selection in chemo-  
 stat populations, where mutants arise at small frequency

$x$  on top of a wild-type population. This is plausible if mutations occur not too frequently, such that the chemostat population is replaced by a mutant and reaches the new steady state before the next mutation arises. The wild-type population under steady-state chemostat conditions has a resource concentration given by (Eq. S28)

$$R^* = K_{\text{wt}} \frac{d}{g_{\text{wt}}^{\text{max}} - d}, \quad (\text{S57})$$

553 where growth rate matches the dilution factor  $g_{\text{wt}}(R^*) =$   
 554  $d$  (Eq. S27). After the mutant appears, the resource  
 555 concentration  $R(t) \approx R^*$  remains constant over a short  
 556 timespan while the mutant still has low frequency  $x \ll 1$ .  
 557 In this time window, the mean growth rate Eq. (S56) is  
 558 set by the wild-type only and thus equals the dilution  
 559 rate:

$$\bar{g}(R^*) \approx d. \quad (\text{S58})$$

560 We insert Eq. (S57) and Eq. (S58) into Eq. (S55) to  
 561 calculate the selection coefficient at invasion with small  
 562 mutant frequency  $x \ll 1$ :

$$\sigma_{\text{high}} = \frac{\Delta g^{\text{max}}}{g_{\text{wt}}^{\text{max}}} d \quad (\text{S59a})$$

$$\sigma_{\text{low}} = - \frac{-\Delta K}{-d\Delta K + K_{\text{mut}} g_{\text{wt}}^{\text{max}} \frac{g_{\text{mut}}^{\text{max}}}{g_{\text{wt}}^{\text{max}}}} \cdot (g_{\text{wt}}^{\text{max}} - d)d. \quad (\text{S59b})$$

563 Note that if we express this selection coefficient in terms  
 564 of the relative mutation effect  $\Delta K/K_{\text{wt}}$ , then the selec-  
 565 tion coefficient is independent of the wild-type trait  $K_{\text{wt}}$   
 566 (compare to Fig. S20 for batch culture, where the selec-  
 567 tion coefficient increases with  $K_{\text{wt}}$  for fixed relative  
 568 mutation effect). This has been observed independently  
 569 in calculations by Dykhuizen et al. [33], who similarly  
 570 decompose the growth rate difference in chemostats. As  
 571 in the case of batch dynamics, the chemostat selection  
 572 coefficient in Eq. (S59) can also be rewritten in terms  
 573 of the specific affinity  $a = g^{\text{max}}/K$  instead of the half-  
 574 saturation concentration  $K$ .

## 575 S10. DEPENDENCE OF SELECTION ON 576 RESOURCE CONCENTRATION

In this section, we use the explicit formula for  $s$  in batch culture (Eq. (S47)) to describe how selection varies with the initial resource concentration  $R_0$  of the growth cycle. For fixed initial biomass  $N_0$ , there is an optimum concentration that maximizes selection on the half-saturation concentration  $K$ . Figure S17A shows non-monotonic behavior of  $s_{\text{low}}$  with initial resource concentration  $R_0$  for an example mutation with beneficial effects on both the maximum growth rate  $g^{\text{max}}$  and the half-saturation  $K$ . In particular, this optimum does not rely

on a tradeoff between the two traits. Instead, Fig. S17B demonstrates that  $s_{\text{low}}$  is the product of two opposing forces: the overall budget for selection in the growth cycle (equivalent to number of generations) increases with  $R_0$ , but the relative selection pressure on the half-saturation concentration decreases. We can identify these two factors from Eq. (S47c) for  $s_{\text{low}}$  on the half-saturation concentration: the selection coefficient is the product of a trait term

$$s_{\text{low}} \propto - \frac{\Delta K}{R_0 + N_0/\bar{Y} + Z} \frac{g_{\text{wt}}^{\text{max}}}{\bar{g}^{\text{max}}} \frac{g_{\text{mut}}^{\text{max}}}{\bar{g}^{\text{max}}}, \quad (\text{S60})$$

which decreases (in magnitude) with  $R_0$ , and a logarithmic term

$$s_{\text{low}} \propto \log \left( \left( 1 + \frac{R_0 \bar{Y}}{N_0} \right) \left( 1 + \frac{R_0}{Z} \right) \right), \quad (\text{S61})$$

577 which increases with  $R_0$  via the number of generations  
 578 in the growth cycle. The optimum concentration, in gen-  
 579 eral, is determined by the wild-type half-saturation con-  
 580 centration (compare Fig. S17C). Figure S17D shows how  
 581 this causes the distribution of fitness effects to vary in  
 582 width non-monotonically with the resource concentration  
 583 as well; the width of this distribution is generally propor-  
 584 tional to the speed of adaptation [34], which thus also  
 585 displays a local maximum and minimum over resource  
 586 concentrations.

587 These effects are not observed in batch dynamics  
 588 with fixed-dilution factor, where selection  $s_{\text{low}}$  decreases  
 589 strictly monotonically with resource concentration. The  
 590 same example mutation in Fig. S18 reaches peak selec-  
 591 tion at the lowest nutrient concentration  $R_0$ . Intuitively,  
 592 the fixed dilution factor  $D$  means the total budget for  
 593 selection (number of generations) is independent of the  
 594 initial concentration  $R_0$  and low concentrations mean a  
 595 larger fraction of time spent in deceleration, but not fewer  
 596 generations.

## 597 S11. MODEL OF EVOLUTIONARY DYNAMICS 598 UNDER STRONG-SELECTION 599 WEAK-MUTATION

600 We can map the dynamics of the mutant frequency  
 601 over batch growth cycles to the Wright-Fisher model of  
 602 population genetics, where each batch growth cycle cor-  
 603 responds to a discrete time step [5, 35]. First, we assume  
 604 the mutation arises only at the beginning of the growth  
 605 cycle at frequency  $1/N_0$ , where  $N_0$  is the bottleneck pop-  
 606 ulation size measured in number of cells. Let  $s(x)$  be the  
 607 selection coefficient for the mutant over a whole batch  
 608 growth cycle, with explicit dependence on the frequency  
 609  $x$  of the mutant at the beginning of the cycle. In the  
 610 limit of large population size ( $N_0 \gg 1$ ) and weak selec-  
 611 tion ( $|s(x)| \ll 1$ ), the fixation probability for the mutant  
 612 is [36]

$$p(s) = \frac{\int_0^{1/N_0} \exp(-2N_0 \int_0^x s(y) dy) dx}{\int_0^1 \exp(-2N_0 \int_0^x s(y) dy) dx}. \quad (\text{S62})$$

613 However, if the selection coefficient  $s(x)$  is approximately  
614 constant over mutant frequencies  $x$ , we can simplify this  
615 to

$$p(s) = \frac{1 - e^{-2s}}{1 - e^{-2N_0 s}}. \quad (\text{S63})$$

We briefly describe the scheme for simulating trait evolution. In general, a mutation can change both growth traits

$$g_{\text{mut}}^{\text{max}} = (1 + \gamma) \cdot g^{\text{max}}, \quad (\text{S64})$$

$$K_{\text{mut}} = (1 + \kappa) \cdot K, \quad (\text{S65})$$

616 where  $\gamma$  is the mutation effect on the wild-type maximum  
617 growth rate  $g^{\text{max}}$  and  $\kappa$  is the relative effect on the half-  
618 saturation concentration  $K$ . Given the absence of correla-  
619 tion between  $g^{\text{max}}$  and  $K$  for autotrophs on phosphate,  
620 nitrate and ammonium (Figs. 3C–D, S10E) and for het-  
621 erotrophs on glucose (Figs. 3F, S10G), we assume that  
622 mutations affect  $K$  independently of maximum growth  
623 rate ( $\gamma = 0$ ). We simulate evolutionary trajectories of  
624 the half-saturation concentration  $K$  by first randomly  
625 sampling a mutation effect  $\kappa$  from a uniform distribu-  
626 tion on the interval  $(-0.1, 0.1)$ . We then calculate the  
627 selection coefficient of this mutation using Eq. (S47) and  
628 the fixation probability according to Eq. (S63). We ran-  
629 domly accept or reject the mutation according to this  
630 probability, and then the cycle repeats with a new muta-  
631 tion (Fig. S19). We also test the effect of frequency-  
632 dependence selection using the fixation probability of  
633 Eq. (S62), but Fig. S22D–F shows that it does not notice-  
634 ably affect evolution of the half-saturation concentra-  
635 tion.

## 636 S12. DERIVATION OF SELECTION-DRIFT 637 BALANCE CONDITION

638 In the limit of weak selection ( $s \ll 1$ ), we can expand  
639 Eq. (S63) to leading order in  $s$ :

$$p(s) \approx \frac{1}{N_0} + \left(1 - \frac{1}{N_0}\right) s, \quad (\text{S66})$$

640 where the first term captures the probability of fixation  
641 due purely to demographic fluctuations (genetic drift),  
642 while the second term captures the correction due to selec-  
643 tion. The balance between selection and drift therefore  
644 occurs when these two contributions are approximately  
645 equal, which gives us  $s \approx 1/N_0$  (Eq. (3) from the main  
646 text) under the additional assumption that  $N_0$  is large.

647 Now we consider the effect of a mutation arising at  
648 some intermediate time  $t$  during a growth cycle. Since at  
649 this time there are  $N_{\text{wt}}(t)$  wild-type cells, the initial fre-  
650 quency of the mutant is  $1/N_{\text{wt}}(t)$ , and the amount of re-  
651 maining resources is  $R(t) = R_0 - (N_{\text{wt}}(t) - N_{\text{wt}}(0))/Y_{\text{wt}}$ .  
652 Therefore the frequency of the mutant at the end of this  
653 cycle is

$$x(t) = \frac{e^{s(t)}}{e^{s(t)} + N_{\text{wt}}(t) - 1}, \quad (\text{S67})$$

654 where  $s(t)$  is the selection coefficient for this mutant aris-  
655 ing at time  $t$ , assuming a growth cycle that starts when  
656 the mutation arises (so we use  $R(t)$  as the initial amount  
657 of resources and  $N_{\text{wt}}(t)$  as the initial population size).

658 Let  $p(t)$  be the probability that this mutant ultimately  
659 fixes. This is the probability that  $n$  mutant cells survive  
660 the transfer, multiplied by the probability those mutants  
661 fix, averaged over all possible  $n$ :

$$\begin{aligned} p(t) &= \sum_{n=0}^{N_0} \binom{N_0}{n} (x(t))^n (1 - x(t))^{N_0 - n} \left( \frac{1 - e^{-2ns(0)}}{1 - e^{-2N_0 s(0)}} \right) \\ &\approx \sum_{n=0}^{N_0} \binom{N_0}{n} (x(t))^n (1 - x(t))^{N_0 - n} \\ &\quad \cdot \left( \frac{n}{N_0} + n \left(1 - \frac{n}{N_0}\right) s(0) \right) \\ &= x(t) [1 + (N_0 - 1)s(0)(1 - x(t))] \\ &\approx \frac{1}{N_{\text{wt}}(t)} + \left( \frac{N_0 - 1}{N_{\text{wt}}(t)} \right) \left( \frac{N_{\text{wt}}(t) - 1}{N_{\text{wt}}(t)} \right) s(0) \\ &\quad + \left( \frac{N_{\text{wt}}(t) - 1}{[N_{\text{wt}}(t)]^2} \right) s(t), \end{aligned} \quad (\text{S68})$$

662 where we have invoked the weak-selection approxima-  
663 tion to the fixation probability (Eq. (S66)) on the sec-  
664 ond line, evaluated moments of the binomial distribution  
665 on the third line, and then expanded the frequency  $x(t)$   
666 (Eq. (S67)) to leading order in  $s(t)$  on the last line. By  
667 neglecting terms that are higher-order in  $1/N_{\text{wt}}(t)$  and  
668  $s(t)$ , we obtain

$$p(t) \approx \frac{1}{N_{\text{wt}}(t)} + \left( \frac{N_0 - 1}{N_{\text{wt}}(t)} \right) s(0). \quad (\text{S69})$$

669 Note that this only depends on the selection coefficient  
670 of the mutant starting at the beginning of the cycle; to  
671 leading order there is no dependence on the selection co-  
672 efficient during that first cycle  $s(t)$ . If we calculate the  
673 condition for selection-drift balance as before, we obtain  
674  $s(0) \approx 1/N_0$  as before. That is, the dependence on the  
675 wild-type population size at which the mutant first arises  
676  $N_{\text{wt}}(t)$  is irrelevant to the selection-drift balance. There-  
677 fore mutations arising during growth cycles have no effect  
678 on the selection-drift balance condition to leading order.

679 **S13. THE EVOLVED HALF-SATURATION**  
 680 **CONCENTRATION AT SELECTION-DRIFT**  
 681 **BALANCE**

In this section, we calculate the evolved half-saturation concentration  $K_{\text{evo}}$  as a function of environmental concentration  $R_0$  and effective population size  $N_e$ . We assume mutations have a maximum relative effect  $|\kappa_{\text{max}}| = |\Delta K/K_{\text{wt}}|$  on the half-saturation concentration, but no effect on maximum growth rate or biomass yield. Therefore the maximum possible selection coefficient for any mutant on the background of a wild-type trait  $K$  is thus

$$s_{\text{low}} = |\kappa_{\text{max}}| \left( \frac{\frac{K}{R_0}}{(1 + \kappa_{\text{max}})\frac{K}{R_0} + 1 + \frac{N_0}{R_0 Y}} \right) \cdot \log \left[ \left( 1 + \frac{R_0 Y}{N_0} \right) \left( 1 + \frac{1}{(1 + \kappa_{\text{max}})\frac{K}{R_0}} \right) \right], \quad (\text{S70})$$

682 where we have rewritten the selection coefficient  
 683 (Eq. (S47)) in terms of the ratio  $K/R_0$  between the  
 684 wild-type half-saturation concentration and the initial re-  
 685 source concentration. Note that we write  $Y$  for the wild-  
 686 type biomass yield, which remains unchanged throughout  
 687 evolution.

688 To simplify Eq. (S70), we assume that the maximum  
 689 mutation effect is small ( $|\kappa_{\text{max}}| \ll 1$ ), the value of the  
 690 half-saturation concentration  $K$  relative the initial re-  
 691 source concentration is small ( $K/R_0 \ll 1$ ), and the fold-  
 692 change over the growth cycle is large ( $R_0 Y/N_0 \gg 1$ ).  
 693 This is true for growth cycles in typical laboratory evolu-  
 694 tion experiments, with typical dilution factors between  
 695  $D = 100$  [37] and  $D = 1500$  [38]. We therefore approx-  
 696 imate the selection coefficient in Eq. (S70) by keeping  
 697 only leading-order terms in these parameters:

$$s_{\text{low}} \approx |\kappa_{\text{max}}| \frac{K}{R_0} \log \left( \frac{R_0 Y/N_0}{K/R_0} \right). \quad (\text{S71})$$

698 The evolved half-saturation concentration  $K_{\text{evo}}$  is de-  
 699 fined as the value of the half-saturation  $K$  such that the  
 700 selection coefficient for a mutation on this half-saturation  
 701 equals the fixation probability of a neutral mutation. We  
 702 must therefore also assume that the maximum strength  
 703 of selection, which occurs for large  $K$ , is greater than  
 704 the neutral fixation probability (Fig. S20A). In the limit  
 705 of small  $|\kappa_{\text{max}}|$  and large  $R_0 Y/N_0$ , the maximum selec-  
 706 tion coefficient is  $|\kappa_{\text{max}}| \log(R_0 Y/N_0)$ , and so this must  
 707 be greater than  $1/N_e$ . To solve for  $K_{\text{evo}}$ , we then set the  
 708 selection coefficient in Eq. (S71) equal to  $1/N_e$  (using  
 709 Eq. (3)) and solve to obtain

$$K_{\text{evo}} \approx - \frac{R_0}{N_e |\kappa_{\text{max}}| W_{-1} \left( - \frac{1}{N_e |\kappa_{\text{max}}| R_0 Y/N_0} \right)}, \quad (\text{S72})$$

710 where  $W_{-1}(z)$  is the  $-1$  branch of the Lambert  $W$  func-  
 711 tion, defined as the solution of the equation  $ye^y = z$  for

712  $-e^{-1} \leq z < 0$  [39]. The latter condition is met since the  
 713 argument of the  $W$  function,  $-1/(N_e |\kappa_{\text{max}}| R_0 Y/N_0)$  is  
 714 certainly less than zero, but also

$$- \frac{1}{N_e |\kappa_{\text{max}}| R_0 Y/N_0} \geq - \frac{1}{N_e |\kappa_{\text{max}}| e \log(R_0 Y/N_0)} > - \frac{1}{e}, \quad (\text{S73})$$

715 where on the first line we have used the fact that  
 716  $e \log(R_0 Y/N_0) \leq R_0 Y/N_0$  and on the second line we have  
 717 used  $N_e |\kappa_{\text{max}}| \log(R_0 Y/N_0) > 1$  from our previous as-  
 718 sumption that the maximum strength of selection is big-  
 719 ger than genetic drift. We can further simplify Eq. (S72)  
 720 using the approximation  $W_{-1}(z) \approx \log(-z)$  for  $|z| \ll 1$ ,  
 721 which gives us Eq. (4) in the main text.

722 We note that this calculation does not work for the  
 723 chemostat selection coefficient (Eq. (S59)) since it does  
 724 not depend on the wild-type trait  $K_{\text{wt}}$  outside of the  
 725 relative mutation effect  $\Delta K/K_{\text{wt}}$ . Therefore the selec-  
 726 tion coefficient does not decrease as  $K$  evolves lower, and  
 727 there is no selection-drift balance.

728 **S14. EVOLUTION TO SELECTION-DRIFT**  
 729 **BALANCE FOR THE SPECIFIC AFFINITY**

730 In this section we repeat our evolutionary analysis us-  
 731 ing the specific affinity  $a = g^{\text{max}}/K$ , instead of the half-  
 732 saturation concentration  $K$ , as the focal trait for muta-  
 733 tion and selection. First we simulate evolution in the  
 734 SSWM regime, then we predict the evolved trait from a  
 735 selection-drift balance condition and derive a scaling re-  
 736 lationship with resource concentration  $R_0$  and effective  
 737 population size  $N_e$ . In combination with the maximum  
 738 growth rate  $g^{\text{max}}$ , the specific affinity  $a$  gives an alter-  
 739 native parametrization of the Monod model of growth.  
 740 Equation (S52) decomposes the total selection coefficient  
 741  $s$  in batch culture, where the component  $s_{\text{lin}}$  captures the  
 742 trait differences in the specific affinity  $a = g^{\text{max}}/K$ .

We assume mutations have a relative effect  $\alpha$  on the specific affinity

$$a_{\text{mut}} = a \cdot (1 + \alpha), \quad (\text{S74})$$

743 but leave the maximum growth rate  $g^{\text{max}}$  and biomass  
 744 yield  $Y$  unchanged. The effect size  $\alpha$  is sampled at ran-  
 745 dom from a uniform distribution, with maximum value  
 746  $\alpha_{\text{max}} > 0$ . This means a single mutation can increase the  
 747 specific affinity at most by a fixed fraction  $\alpha_{\text{max}}$ . This  
 748 set of assumptions mirrors the evolutionary simulations  
 749 carried out for the half-saturation  $K$ . We simulate the  
 750 trait evolution over long times, where each new muta-  
 751 tion either fixes or goes extinct before the next mutation  
 752 arises.

Figure S23 shows that evolution of the specific affinity  $a = g^{\text{max}}/K$  leads to behavior that is analogous to



when mutations target the half-saturation concentration  $K$ : the specific affinity  $a$  evolves upwards over successive mutations, improving the growth rate at low concentration, but eventually the trait  $a$  stalls in adaptation around an upper limit. The limiting value depends on the effective population size  $N_e$  between transfers (compare panels in Fig. S23). Following the same reasoning as in Sec. S13, we define the evolved trait  $a_{\text{evo}}$  as the trait value where selection-drift balance is achieved:

$$s_{\text{lin}} = \frac{1}{N_e}. \quad (\text{S75})$$

Figure S23 shows that the simulated trajectories are predicted well by Eq. (S75), which we solve numerically for specific affinity  $a_{\text{evo}}$  at selection-drift balance.

We follow the same steps as in Sec. S13 to derive a similar scaling relationship for  $a_{\text{evo}}$  as a function of the resource concentration  $R_0$  and the effective population size  $N_e$ . The maximum possible selection coefficient for any mutation on the background of a wild-type trait  $a$  is

$$s_{\text{lin}} = \alpha_{\text{max}} \left( \frac{\frac{g^{\text{max}}}{aR_0}}{(1 + \alpha_{\text{max}}) \left(1 + \frac{N_0}{R_0 Y}\right) + \frac{g^{\text{max}}}{aR_0}} \right) \cdot \log \left[ \left(1 + \frac{R_0 Y}{N_0}\right) \left(1 + \frac{aR_0}{g^{\text{max}}} (1 + \alpha_{\text{max}})\right) \right], \quad (\text{S76})$$

where we have rewritten the selection component (Eq. S52c) in terms of the ratio  $g^{\text{max}}/(aR_0) = K/R_0$  between the wild-type traits and the initial resource concentration. To simplify Eq. (S76), we assume that the maximum mutation effect is small ( $\alpha_{\text{max}} \ll 1$ ), the fold-change over the growth cycle is large ( $R_0 Y/N_0 \gg 1$ ), and the evolved value of the specific affinity  $a$  is large relative to the initial resource concentration ( $g^{\text{max}}/(aR_0) \ll 1$ ). This last assumption is equivalent to assuming a highly-adapted half-saturation concentration ( $K/R_0 \ll 1$ ), just as we did in Sec. S13. We thus approximate the selection coefficient in Eq. (S76) by keeping only the leading-order terms in these parameters:

$$s_{\text{lin}} \approx \alpha_{\text{max}} \frac{g^{\text{max}}}{aR_0} \log \left( \frac{R_0 Y/N_0}{g^{\text{max}}/(aR_0)} \right). \quad (\text{S77})$$

The evolved specific affinity  $a_{\text{evo}}$  is defined as the value of the specific affinity such that the selection coefficient for a mutation on this trait value equals the fixation probability of a neutral mutation. Again, we must assume that the maximum strength of selection, which occurs for small  $a$ , is greater than the neutral fixation probability (Fig. S20B). In the limit of small  $\alpha_{\text{max}}$  and large  $R_0 Y/N_0$ , the maximum selection coefficient is  $\alpha_{\text{max}} \log(R_0 Y/N_0)$  so this must be greater than  $1/N_e$ . To calculate  $a_{\text{evo}}$ , we then set the selection coefficient in Eq. (S77) equal to  $1/N_e$  and solve to obtain

$$a_{\text{evo}} \approx -g^{\text{max}} \frac{N_e \alpha_{\text{max}}}{R_0} \cdot W_{-1} \left( -\frac{1}{N_e \alpha_{\text{max}} R_0 Y/N_0} \right), \quad (\text{S78})$$

where  $W_{-1}(z)$  is the  $-1$  branch of the Lambert  $W$  function, introduced above in Eq. (S72). Just as before, we confirm that the evolved trait  $a_{\text{evo}}$  is confined to this solution branch and use the approximation  $W_{-1}(z) \approx \log(-z)$  to arrive at the final scaling relationship

$$a_{\text{evo}} \approx g^{\text{max}} \frac{N_e \alpha_{\text{max}}}{R_0} \log \left( N_e \alpha_{\text{max}} \frac{R_0 Y}{N_0} \right), \quad (\text{S79})$$

which is the analogous result to Eq. (4) in the main text. How does the evolved specific affinity  $a_{\text{evo}}$  (Eq. (S78)) compare to the evolved half-saturation concentration  $K_{\text{evo}}$  (Eq. (S72))? They are mathematically equivalent if the mutation effects sizes  $\alpha_{\text{max}}$  and  $|\kappa_{\text{max}}|$  are equal, which holds in the limit where they are both small. That is, if we express the relation  $a_{\text{mut}} = a(1 + \alpha_{\text{max}})$  for the mutation effect on  $a$  as  $g_{\text{mut}}^{\text{max}}/K_{\text{mut}} = (g_{\text{wt}}^{\text{max}}/K_{\text{wt}})(1 + \alpha_{\text{max}})$ , and then use the fact that  $g^{\text{max}}$  is unchanged by the mutation ( $g_{\text{mut}}^{\text{max}} = g_{\text{wt}}^{\text{max}}$ ), we then get

$$K_{\text{mut}} = \frac{K_{\text{wt}}}{1 + \alpha_{\text{max}}} \approx K_{\text{wt}}(1 - \alpha_{\text{max}}), \quad (\text{S80})$$

which, compared with the definition of  $\kappa = (K_{\text{mut}} - K_{\text{wt}})/K_{\text{wt}}$ , shows that  $\alpha_{\text{max}} = |\kappa_{\text{max}}|$  when both are small.

Altogether this shows that focusing on specific affinity  $a$  leads to equivalent evolutionary outcomes as focusing on the half-saturation concentration  $K$ , including the dependence on the resource concentration  $R_0$  and the mode of population dynamics (fixed-bottleneck or fixed-dilution batch dynamics, or chemostat dynamics). This makes sense since mutations that affect  $a$  but leave  $g^{\text{max}}$  constant must therefore only affect  $K$ , and thus the only difference between these approaches is the choice of mathematical parameterization. We can also speculate what would happen if mutations affect both the maximum growth rate  $g^{\text{max}}$  and the specific affinity  $a$  simultaneously (but assuming no correlation in effects). We expect that the maximum growth rate will evolve to the highest physiologically-feasible value, which will serve as the effective maximum growth rate to convert between  $a$  and  $K$ . Intuitively, this would still lead to identical selection-drift balance for the half-saturation concentration  $K$  and the specific affinity  $a$ .

## S15. EFFECT OF EVOLVED HALF-SATURATION CONCENTRATION VALUES ON MEASUREMENT APPROACHES

In the main text we present a survey of empirical values for the half-saturation concentration  $K$ , as well as an evolutionary model suggesting that  $K$  should generally be much smaller than the concentration of the corresponding resource in the evolutionary environment. Here we explore what these values of  $K$  mean for three approaches to measuring  $K$  under laboratory conditions.

## 798 A. Inferring half-saturation concentrations under 799 chemostat growth

800 Arguably the most direct approach to measuring  $K$  is  
801 to use a chemostat (Sec. S5). This setup takes an inverse  
802 approach to the Monod model relation in Eq. (1): instead  
803 of varying the resource concentration  $R$  and measuring  
804 the growth rate  $g$ , as suggested by the functional form  
805 of the model, we vary the growth rate (by controlling  
806 the dilution rate  $d$ , which must equal the growth rate  $g$   
807 in steady state) and measure the corresponding resource  
808 concentration  $R$ . We first identify the maximum growth  
809 rate  $g^{\max}$  by gradually increasing the dilution rate  $d$  until  
810 the population collapses; the maximum dilution rate that  
811 the population can sustain equals the maximum growth  
812 rate  $g^{\max}$ . Then we set the dilution rate to half the maxi-  
813 mum growth rate ( $d = g^{\max}/2$ ) and measure the resource  
814 concentration at this state, which by definition of the  
815 Monod model (Eq. (1)) must equal the half-saturation  
816 concentration  $K$ .

817 In light of what we know about typical values of the  
818 half-saturation concentration  $K$ , what challenges does  
819 this pose for such measurements? We must either di-  
820 rectly measure resource concentrations in the medium  
821 around the value  $K$  (which may be difficult depending  
822 on the sensitivity of such a measurement), or infer the  
823 resource concentration from the biomass concentration  
824  $N^* = (R_{\text{source}} - K)Y$  (Eq. S29). In the latter case, we  
825 would also need to know the source concentration  $R_{\text{source}}$   
826 we are supplying to the culture as well as the yield  $Y$ .  
827 However, we are not limited by low biomass concentra-  
828 tions in the chemostat, as we can arbitrarily increase the  
829 biomass concentration by increasing the source concen-  
830 tration  $R_{\text{source}}$ . For example, for *E. coli* on glucose, the  
831 half-saturation concentration is  $K \sim 10$   $\mu\text{M}$  (Fig. 2B),  
832 the yield is  $Y = 3.3 \times 10^8$  cells/ $\mu\text{mol}$  [30], and a typical  
833 laboratory concentration of glucose to provide could be  
834  $R_{\text{source}} = 11000$   $\mu\text{M}$  (0.2% w/v). In this case the concen-  
835 tration of *E. coli* would be  $3.6 \times 10^9$  cells/mL, which is  
836 high enough to easily measure through different standard  
837 techniques. For example, this cell density corresponds to  
838 an optical density (OD) of approximately 3.6 (using 1 OD  
839 =  $10^9$  cells/mL, for wavelengths of 600 nm and a path  
840 length of 1 cm), which is easily measured in a standard  
841 spectrophotometer.

## 842 B. Inferring half-saturation concentrations under 843 batch growth using the initial growth rate

844 A second approach uses cultures under batch growth.  
845 This takes a direct approach to the Monod model com-  
846 pared to the chemostat: we vary the initial concentration  
847 of the resource over some range around the concentration  
848  $K$  and measure the initial growth rate of the biomass as  
849 a function of these concentrations. We then fit this data  
850 to the Monod model (Eq. (1)) and infer the concentra-  
851 tion  $K$ . Note that this assumes that the population can

852 rapidly adjust its growth rate to the external resource  
853 concentration, so that the measurement is not biased by  
854 the previous state of the culture (e.g., under starvation).

855 Therefore we need to perform this experiment with ini-  
856 tial resource concentrations  $R_0$  that are around the value  
857 of  $K$ . The total biomass concentration at the end of such  
858 a batch growth cycle would be  $KY + N_0$ , where  $N_0$  is the  
859 initial biomass concentration. Using the previous exam-  
860 ple of *E. coli* on glucose, the biomass concentration  $KY$   
861 is approximately  $3.3 \times 10^6$  cells/mL, which corresponds  
862 to an OD of  $3.3 \times 10^{-3}$ . However, to measure growth, we  
863 must start at a concentration at least 10–100 times lower  
864 than this to have a sufficiently large dynamic range of  
865 the biomass to accurately measure the growth rate. This  
866 range of concentrations is too low to be detected on typi-  
867 cal spectrophotometers, which usually have a lower limit  
868 of  $10^{-3}$  to  $10^{-2}$  OD, so only methods with greater sen-  
869 sitivity to low concentrations (e.g., colony counting on  
870 plates or luminescence) would be suitable. In this case,  
871 note that the difficulty with measuring  $K$  this way is not  
872 due to its magnitude relative to a typical glucose concen-  
873 tration  $R$ , but that the biomass produced by this resource  
874 concentration ( $KY$ ) is low compared to the lower limit  
875 of typical detection methods.

## 876 C. Inferring half-saturation concentrations under 877 batch dynamics using the deceleration into 878 starvation

879 The third approach also uses batch cultures, but in-  
880 stead of considering how the initial growth rate varies  
881 with initial resource concentration, we use a fixed initial  
882 resource concentration  $R_0$  and infer  $K$  from how growth  
883 rate spontaneously decelerates into starvation at the end  
884 of the growth cycle. Equation S11 defines the ODEs for  
885 batch growth with a wild-type and mutant strain. If we  
886 simplify this to a single strain, insert the Monod model  
887 for growth rate (Eq. (1)), and integrate the resource con-  
888 sumption equation (to express resource  $R(t)$  in terms of  
889 biomass  $N(t)$ , as in Eq. S12), we obtain a single non-  
890 linear ODE for the biomass concentration:

$$\frac{d}{dt}N(t) = g^{\max} \frac{R_0 - N(t)/Y}{R_0 - N(t)/Y + K} N(t). \quad (\text{S81})$$

891 In principle we can fit this ODE to time-series data for  
892 the biomass concentration  $N(t)$  (the growth curve) and  
893 infer the half-saturation concentration  $K$ .

894 Intuitively, though, this only works if the growth curve  
895 has enough data during the deceleration phase of growth  
896 where the half-saturation  $K$  is relevant; see Fig. S24 for  
897 a schematic example. Previous work has studied this  
898 as a problem of statistical estimation, calculating param-  
899 eter sensitivities to identify the optimum measure-  
900 ment concentration and discussing variable transforma-  
901 tions to simplify the regression (see Robinson [40] for an

overview). The basic conclusion is that the initial resource concentration  $R_0$  must be near the value of the half-saturation concentration  $K$  itself for the fit to work robustly.

We can justify the intuition for this conclusion as follows. If the initial resource concentration  $R_0$  is instead much greater than the half-saturation concentration  $K$ , then the fold-change during deceleration will be too small to provide sufficient dynamic range for a fit. That is, deceleration approximately begins at the time  $t_{\text{decel}}$  when  $R(t_{\text{decel}}) = K$ , so that the biomass concentration is  $N(t_{\text{decel}}) = N_0 + (R_0 - K)Y$ . Since the final biomass concentration at saturation is  $N(t_{\text{sat}}) = N_0 + R_0Y$ , the fold-change during deceleration is therefore

$$\begin{aligned} \frac{N(t_{\text{sat}})}{N(t_{\text{decel}})} &= \frac{N_0 + R_0Y}{N_0 + (R_0 - K)Y} \\ &= 1 + \frac{\frac{K}{R_0}}{1 - \frac{K}{R_0} + \frac{N_0}{R_0Y}}. \end{aligned} \quad (\text{S82})$$

However, if  $R_0$  is much larger than  $K$ , then this fold-change is approximately  $1 + K/R_0$ , meaning that it is very close to 1 (corresponding to no growth during decel-

eration). Visually, this appears as a growth curve with an abrupt transition from the maximum growth rate  $g^{\text{max}}$  to zero growth (inset of Fig. 4). Since typical concentrations of many resources (such as glucose) used in the laboratory are indeed much larger than the  $K$  half-saturation concentrations, this is why these growth curves usually do not contain useful data on the half-saturations  $K$ .

On the other hand, if  $R_0$  is much less than  $K$ , then the growth dynamics are approximately logistic:

$$\frac{d}{dt}N(t) \approx g^{\text{max}} \frac{R_0}{K} N(t) \left(1 - \frac{N(t)}{R_0Y}\right), \quad (\text{S83})$$

which we obtain similarly with Eq. (S81) but in the limit  $R_0 \ll K$ . In this case, one can only infer the combined parameter  $g^{\text{max}}R_0/K$  from the growth curve and not the half-saturation concentration  $K$  by itself. Therefore the half-saturation  $K$  can only be inferred from the growth curve if the initial concentration  $R_0$  is around the value of  $K$  itself. However, this is the same parameter regime as needed for the previous method of inferring  $K$  from the initial growth rates, and thus it poses the same practical challenges, such as sensitivity to very low biomass concentrations.

- 
- [1] R. V. O'Neill, D. L. DeAngelis, J. J. Pastor, B. J. Jackson, and W. M. Post. Multiple nutrient limitations in ecological models. *Ecol Modelling*, 46:147–163, 1989.
- [2] M. Zinn, B. Witholt, and T. Egli. Dual nutrient limited growth: models, experimental observations, and applications. *J Biotechnol*, 113:263–279, 2004.
- [3] Mak A. Saito, Tyler J. Goepfert, and Jason T. Ritt. Some thoughts on the concept of colimitation: Three definitions and the importance of bioavailability. *Limnology and Oceanography*, 53(1):276–290, 2008.
- [4] E. Sperfeld, D. Martin-Creuzburg, , and A. Wacker. Multiple resource limitation theory applied to herbivorous consumers: Liebig's minimum rule vs. interactive colimitation. *Ecol Lett*, 15:142–150, 2012.
- [5] Michael Manhart, Bharat V. Adkar, and Eugene I. Shakhnovich. Trade-offs between microbial growth phases lead to frequency-dependent and non-transitive selection. *Proceedings of the Royal Society B: Biological Sciences*, 285(1872), 2018.
- [6] M. Manhart and E. I. Shakhnovich. Growth tradeoffs produce complex microbial communities on a single limiting resource. *Nat Commun*, 9:3214, 2018.
- [7] Jie Lin, Michael Manhart, and Ariel Amir. Evolution of Microbial Growth Traits Under Serial Dilution. *Genetics*, 215(3), 2020.
- [8] R. H. MacArthur. Species packing and competitive equilibria for many species. *Theor Pop Biol*, 1:1–11, 1970.
- [9] F. F. Blackman. Optima and limiting factors. *Annals of Botany*, 19:281–295, 1905.
- [10] J. R. Casey and M. J. Follows. A steady-state model of microbial acclimation to substrate limitation. *PLoS Comput Biol*, 16:e1008140, 2020.
- [11] C. S. Holling. Some characteristics of simple types of predation and parasitism i. *The Canadian Entomologist*, 91:358–369, 1959.
- [12] J. Monod. The growth of bacterial cultures. *Annu Rev Microbiol*, 3:371–394, 1949.
- [13] M. R. Droop. Some thoughts on nutrient limitation in algae. *Journal of Phycology*, 9:264–272, 1973.
- [14] U. Sommer. A comparison of the Droop and the Monod models of nutrient limited growth applied to natural populations of phytoplankton. *Funct Ecol*, 5:535–544, 1991.
- [15] W. G. Sunda, K. W. Shertzer, and D. R. Hardison. Ammonium uptake and growth models in marine diatoms: Monod and Droop revisited. *Mar Ecol Prog Ser*, 386:29–41, 2009.
- [16] H. Wang, P. V. Garcia, S. Ahmed, and C. M. Heggerud. Mathematical comparison and empirical review of the Monod and Droop forms for resource-based population dynamics. *Ecol Model*, 466:109887, 2022.
- [17] L. Von Bertalanffy. Quantitative laws in metabolism and growth. *Q Rev Biol*, 32:217–231, 1957.
- [18] H. Moser. *The Dynamics of Bacterial Populations Maintained in the Chemostat*. Carnegie Institution of Washington, 1958.
- [19] S. F. M. Hart, D. Skelding, A. J. Waite, J. C. Burton, and W. Shou. High-throughput quantification of microbial birth and death dynamics using fluorescence microscopy. *Quant Biol*, 7:69–81, 2019.
- [20] Frank M. Stewart and Bruce R. Levin. Partitioning of Resources and the Outcome of Interspecific Competition: A Model and Some General Considerations. *The American Naturalist*, 107(954):171–198, 1973.
- [21] Meike T. Wortel. Evolutionary coexistence in a fluctuating environment. *Journal of Theoretical Biology*, 100:1–11, 1983.

- 1003 tuating environment by specialization on resource level. 1039  
1004 *BioRxiv*, preprint:2021.05.18.444718, 2021. 1040
- 1005 [22] S. J. Schink, E. Biselli, C. Ammar, and U. Gerland. 1041  
1006 Death rate of *E. coli* during starvation is set by main- 1042  
1007 tenance cost and biomass recycling. *Cell Syst*, 9:64–73, 1043  
1008 2019. 1044
- 1009 [23] P. van Bodegom. Microbial maintenance: A critical re- 1045  
1010 view on its quantification. *Microb Ecol*, 53:513–523, 2007. 1046
- 1011 [24] Pauli Virtanen, Ralf Gommers, Travis E. Oliphant, Matt 1047  
1012 Haberland, Tyler Reddy, David Cournapeau, Evgeni 1048  
1013 Burovski, Pearu Peterson, Warren Weckesser, Jonathan 1049  
1014 Bright, Stéfan J. van der Walt, Matthew Brett, Joshua 1050  
1015 Wilson, K. Jarrod Millman, Nikolay Mayorov, Andrew 1051  
1016 R. J. Nelson, Eric Jones, Robert Kern, Eric Larson, C J 1052  
1017 Carey, İlhan Polat, Yu Feng, Eric W. Moore, Jake Van- 1053  
1018 derPlas, Denis Laxalde, Josef Perktold, Robert Cim- 1054  
1019 man, Ian Henriksen, E. A. Quintero, Charles R. Har- 1055  
1020 ris, Anne M. Archibald, Antônio H. Ribeiro, Fabian Pe- 1056  
1021 dregosa, Paul van Mulbregt, and SciPy 1.0 Contributors. 1057  
1022 SciPy 1.0: Fundamental Algorithms for Scientific Com- 1058  
1023 puting in Python. *Nature Methods*, 17:261–272, 2020. 1059
- 1024 [25] Nicolai S. Panikov. *Microbial Growth Kinetics*. London: 1060  
1025 Chapman & Hall, 1995. 1061
- 1026 [26] D. Tilman. *Resource competition and community struc- 1062  
1027 ture*. Princeton University Press, Princeton, NJ, 1982. 1063
- 1028 [27] Joey R. Bernhardt, Pavel Kratina, Aaron Louis Pereira, 1064  
1029 Manu Tamminen, Mridul K. Thomas, and Anita Nar- 1065  
1030 wani. The evolution of competitive ability for essential 1066  
1031 resources. *Philosophical Transactions of the Royal Soci- 1067  
1032 ety B: Biological Sciences*, 375(1798):20190247, 2020. 1068
- 1033 [28] H W Jannasch. Growth characteristics of heterotrophic 1069  
1034 bacteria in seawater. *Journal of Bacteriology*, 95(2):722– 1070  
1035 723, 1968. 1071
- 1036 [29] Jeanne S. Poindexter. *Oligotropy*, pages 63–89. Springer 1072  
1037 US, 1981. 1073
- 1038 [30] Farida Vasi, Michael Travisano, and Richard E. Lenski. 1074  
1075 Long-Term Experimental Evolution in *Escherichia coli*.  
II. Changes in Life-History Traits During Adaptation  
to a Seasonal Environment. *The American Naturalist*,  
144(3):432–456, 1994.
- [31] E. Atolia, S. Cesar, H. A. Arjes, M. Rajendram, H. Shi,  
B. D. Knapp, S. Khare, A. Aranda-Díaz, R. E. Lenski,  
and K. C. Huang. Environmental and physiological fac-  
tors affecting high-throughput measurements of bacterial  
growth. *mBio*, 11:e01378–20, 2020.
- [32] S. Sharma and R. Steuer. Modelling microbial commu-  
nities using biochemical resource allocation analysis. *J R  
Soc Inter*, 16:20190474, 2019.
- [33] Daniel Dykhuizen and Daniel Hartl. Evolution of com-  
petitive ability in *Escherichia coli*. *Evolution*, 35:581,  
1981.
- [34] M. M. Desai, D. S. Fisher, and A. W. Murray. The speed  
of evolution and maintenance of variation in asexual popu-  
lations. *Curr Biol*, 17:385–394, 2007.
- [35] J. F. Crow and M. Kimura. *An Introduction to Popula-  
tion Genetics Theory*. Harper and Row, New York, 1970.
- [36] Motoo Kimura. On the Probability of Fixation of Mutant  
Genes in a Population. *Genetics*, 47(6):713–719, 1962.
- [37] R. E. Lenski, M. R. Rose, S. C. Simpson, and S. C.  
Tadler. Long-term experimental evolution in *Escherichia  
coli*. I. Adaptation and divergence during 2,000 genera-  
tions. *Am Nat*, 138:1315–1341, 1991.
- [38] Nittay Meroz, Nesli Tovi, Yael Sorokin, and Jonathan  
Friedman. Community composition of microbial mi-  
crocosms follows simple assembly rules at evolutionary  
timescales. *Nature Communications*, 12, 2021.
- [39] E. W. Weisstein. Lambert W-function. From  
MathWorld—A Wolfram Web Resource. <https://mathworld.wolfram.com/LambertW-Function.html>,  
2022. Accessed 2022-09-03.
- [40] Joseph A. Robinson. Determining microbial kinetic pa-  
rameters using nonlinear regression analysis. *Advances  
in Microbial Ecology*, 8:61–114, 1985.
